# Supplementary material for: Exercise as a model to identify microRNAs linked to human cognition: a role for microRNA-409 and microRNA-501
Source: Springer Nature journal article supplement (doi:10.1038/s41398-021-01627-w), 2021-10-08

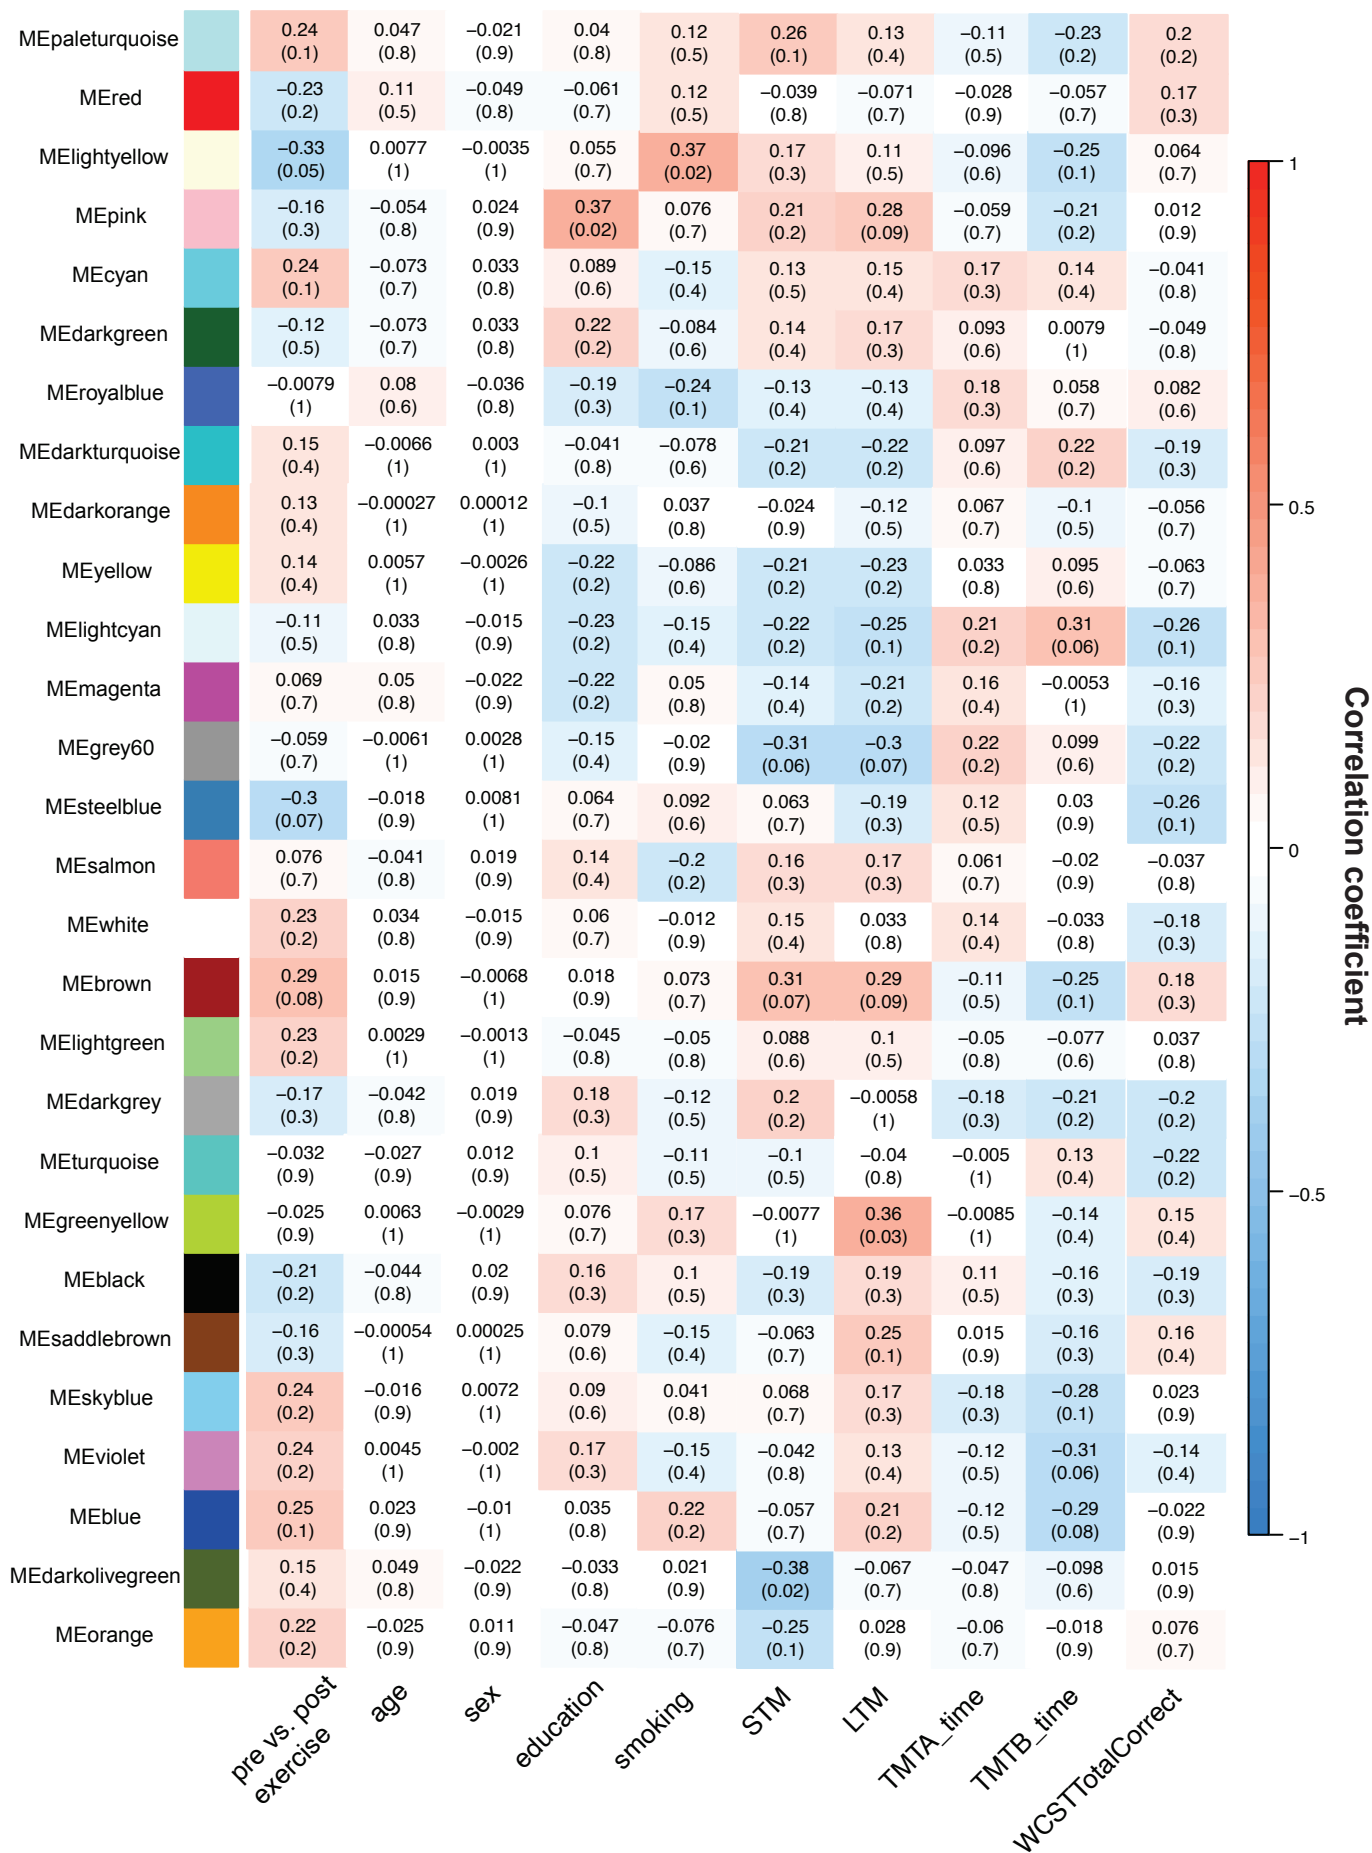

Supplement: MOESM4 [file 41398_2021_1627_MOESM4_ESM.pdf]
