# Supplementary material for: Exercise as a model to identify microRNAs linked to human cognition: a role for microRNA-409 and microRNA-501
Source: Springer Nature journal article supplement (doi:10.1038/s41398-021-01627-w), 2021-10-08

miR-409-5p down  
(1341)

miR-501-3p down  
(1911)

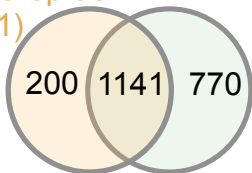

Supplement: MOESM6 [file 41398_2021_1627_MOESM6_ESM.pdf]
