# Supplementary material for: Exercise as a model to identify microRNAs linked to human cognition: a role for microRNA-409 and microRNA-501
Source: Transl Psychiatry. 2021 Oct 8;11:514. doi: 10.1038/s41398-021-01627-w (PMC8501071; doi:10.1038/s41398-021-01627-w)
Supplement: Supplementary file 7 — Supplemental table 1 [file 41398_2021_1627_MOESM7_ESM.xlsx]

## Sheet: Table S1
Supplemental table 1		Phenotypic information on the analyzed individuals (pre exercise)
Parameter	Mean (sd)
Age (years)	39.05 (10.10)
Weight, Kg	81.3 (13.73)
Higher Education (years)	17.11 (4.09)
Systolic blood pressure, mmHg	132.5 (12.65)
Diastolic blood pressure, mmHg	77.71 (8.88)
Puls, bpm	73.37
