# Supplementary material for: Exercise as a model to identify microRNAs linked to human cognition: a role for microRNA-409 and microRNA-501
Source: Transl Psychiatry. 2021 Oct 8;11:514. doi: 10.1038/s41398-021-01627-w (PMC8501071; doi:10.1038/s41398-021-01627-w)
Supplement: Supplementary file 10 — Supplemental table 4 [file 41398_2021_1627_MOESM10_ESM.xlsx]

## Sheet: Table S4
Supplemental table 4		Differentially expressed genes after anti-miR-409-5p treatment in primay neurons
Gene	baseMean	log2FoldChange	padj	symbol	entrez	minus log10 adj p
ENSMUSG00000064341	110309	0.735007	5.28e-36	ND1	17716	35.2774
ENSMUSG00000078578	3821.42	0.888945	1.24e-23	Ube2d3	66105	22.9066
ENSMUSG00000071267	752.066	1.0566	2.83e-23	Zfp942	73233	22.5482
ENSMUSG00000069662	7974.68	0.820976	6.62e-23	Marcks	17118	22.1791
ENSMUSG00000062014	9861.9	0.568551	1.23e-20	Gmfb	63985	19.9101
ENSMUSG00000027676	883.499	0.985563	2.38e-20	Ccdc39	51938	19.6234
ENSMUSG00000029823	3157.67	0.751481	7.87e-20	Luc7l2	192196	19.104
ENSMUSG00000031197	1995.2	0.759145	1.2e-19	Vbp1	22327	18.9208
ENSMUSG00000046785	8061.14	0.57598	1.2e-19	Epm2aip1	77781	18.9208
ENSMUSG00000033972	371.019	1.12113	8.34e-17	Zfp944	319615	16.0788
ENSMUSG00000033953	9374.11	0.580825	1.08e-16	Ppp3r1	19058	15.9666
ENSMUSG00000071172	2192.42	0.570096	1.4e-16	Srsf3	20383	15.8539
ENSMUSG00000031202	1260.58	0.84075	1.6e-16	Rab39b	67790	15.7959
ENSMUSG00000027206	3339.1	0.586757	1.64e-16	Cops2	12848	15.7852
ENSMUSG00000030759	3766.38	0.691873	7.33e-16	Far1	67420	15.1349
ENSMUSG00000073639	3984.45	0.579477	1.15e-15	Rab18	19330	14.9393
ENSMUSG00000053347	469.268	0.932588	2.14e-15	Zfp943	74670	14.6696
ENSMUSG00000009470	2841.73	0.661741	2.34e-15	Tnpo1	238799	14.6308
ENSMUSG00000035133	3693.5	0.606485	2.34e-15	Arhgap5	11855	14.6308
ENSMUSG00000059142	813.432	0.789726	2.34e-15	Zfp945	240041	14.6308
ENSMUSG00000036902	1961.09	0.678898	3.47e-15	Neto2	74513	14.4597
ENSMUSG00000012422	2381.44	0.593512	3.47e-15	Tmem167	66074	14.4597
ENSMUSG00000042460	1181.52	0.728089	4.29e-15	C1galt1	94192	14.3675
ENSMUSG00000022698	2723.92	0.748245	4.64e-15	Naa50	72117	14.3335
ENSMUSG00000021712	2637.33	0.614362	5.53e-15	Trim23	81003	14.2573
ENSMUSG00000036282	1275.98	0.821889	6.88e-15	Naa30	70646	14.1624
ENSMUSG00000006262	1476.12	0.830138	6.91e-15	Mob1b	68473	14.1605
ENSMUSG00000047037	2286.73	0.563222	7.67e-15	Nipa1	233280	14.1152
ENSMUSG00000017412	2072.67	0.638933	9.7e-15	Cacnb4	12298	14.0132
ENSMUSG00000018199	2859.2	0.730722	9.7e-15	Ro60	20822	14.0132
ENSMUSG00000026721	7973.06	0.662506	1.3e-14	Rabgap1l	29809	13.8861
ENSMUSG00000026384	2826.11	0.721134	3.79e-14	Ptpn4	19258	13.4214
ENSMUSG00000028719	2770.02	0.585044	3.79e-14	Cmpk1	66588	13.4214
ENSMUSG00000050334	2610	0.517806	4.14e-14	C130071C03Rik	320203	13.383
ENSMUSG00000096433	256.943	1.15764	7.28e-14	Zfp994	240038	13.1379
ENSMUSG00000035293	904.064	0.71931	7.91e-14	G2e3	217558	13.1018
ENSMUSG00000056260	636.077	0.855975	1.08e-13	Lrif1	321000	12.9666
ENSMUSG00000004364	4286.8	0.492794	1.32e-13	Cul3	26554	12.8794
ENSMUSG00000003948	3210.31	0.621339	1.66e-13	Mmd	67468	12.7799
ENSMUSG00000022105	2006.74	0.555258	2.33e-13	Rb1	19645	12.6326
ENSMUSG00000094483	14380.2	0.552125	2.36e-13	Purb	19291	12.6271
ENSMUSG00000020290	6699.31	0.573521	2.65e-13	Xpo1	103573	12.5768
ENSMUSG00000018379	5106.93	0.598397	2.96e-13	Srsf1	110809	12.5287
ENSMUSG00000061244	2447.59	0.565612	6.21e-13	Exoc5	105504	12.2069
ENSMUSG00000062949	857.39	0.684544	6.43e-13	Atp11c	320940	12.1918
ENSMUSG00000038702	867.067	0.637081	1.71e-12	Dsel	319901	11.767
ENSMUSG00000020463	1873.89	0.595936	1.84e-12	Ppp4r3b	104570	11.7352
ENSMUSG00000056579	4716.67	0.52161	2.1e-12	Tug1	544752	11.6778
ENSMUSG00000035597	1334.3	0.708923	2.1e-12	Prpf39	328110	11.6778
ENSMUSG00000027499	14786.3	0.458047	2.62e-12	Pkia	18767	11.5817
ENSMUSG00000020189	3429.06	0.56297	3.87e-12	Osbpl8	237542	11.4123
ENSMUSG00000027828	4878.65	0.374046	4.5e-12	Ssr3	67437	11.3468
ENSMUSG00000030729	18660.4	0.510676	4.55e-12	Pgm2l1	70974	11.342
ENSMUSG00000012405	2046.9	0.51726	4.55e-12	Rpl15	66480	11.342
ENSMUSG00000067194	8903.74	0.563573	4.85e-12	Eif1ax	66235	11.3143
ENSMUSG00000061273	2054.41	0.488301	5e-12	Mmgt1	236792	11.301
ENSMUSG00000073062	166.142	1.47742	5e-12	Zxdb	668166	11.301
ENSMUSG00000025860	1991.07	0.55963	5.19e-12	Xiap	11798	11.2848
ENSMUSG00000036894	1309.97	0.685316	6.13e-12	Rap2b	74012	11.2125
ENSMUSG00000026761	1342.6	0.606394	6.37e-12	Orc4	26428	11.1959
ENSMUSG00000031367	1860.59	0.709508	7.2e-12	Ap1s2	108012	11.1427
ENSMUSG00000027981	1300.04	0.558412	8.93e-12	Rnpc3	67225	11.0491
ENSMUSG00000026361	1261.9	0.703358	9.22e-12	Cdc73	214498	11.0353
ENSMUSG00000022865	12726.1	0.558041	1.07e-11	Cxadr	13052	10.9706
ENSMUSG00000040118	6593.37	0.54611	1.51e-11	Cacna2d1	12293	10.821
ENSMUSG00000019906	4439.74	0.51564	1.51e-11	Lin7a	108030	10.821
ENSMUSG00000037720	2939.48	0.534662	1.86e-11	Tmem33	67878	10.7305
ENSMUSG00000031176	3656.89	0.525942	1.87e-11	Dynlt3	67117	10.7282
ENSMUSG00000019818	1434.67	0.550764	1.87e-11	Cd164	53599	10.7282
ENSMUSG00000064351	194699	0.308578	2.01e-11	COX1	17708	10.6968
ENSMUSG00000031278	5868.73	0.493131	2.02e-11	Acsl4	50790	10.6946
ENSMUSG00000025979	2458.33	0.581161	2.18e-11	Mob4	19070	10.6615
ENSMUSG00000022533	3243.8	0.485717	2.28e-11	Atp13a3	224088	10.6421
ENSMUSG00000033184	3017.2	0.613146	2.5e-11	Tmed7	66676	10.6021
ENSMUSG00000032449	2505.74	0.56119	2.6e-11	Slc25a36	192287	10.585
ENSMUSG00000042208	3043.27	0.444276	2.6e-11	0610010F05Rik	71675	10.585
ENSMUSG00000040710	786.057	0.723336	3.05e-11	St8sia4	20452	10.5157
ENSMUSG00000072704	2280.92	0.602716	3.05e-11	Smim10l1	381820	10.5157
ENSMUSG00000027677	4440.48	0.536702	3.11e-11	Ttc14	67120	10.5072
ENSMUSG00000073678	5899.78	0.477733	3.19e-11	Pgap1	241062	10.4962
ENSMUSG00000032293	5102.87	0.454797	3.45e-11	Ireb2	64602	10.4622
ENSMUSG00000002617	908.489	0.708554	3.45e-11	Zfp40	22700	10.4622
ENSMUSG00000021816	11636.3	0.505786	3.48e-11	Ppp3cb	19056	10.4584
ENSMUSG00000046699	1633.99	0.676857	3.63e-11	Slitrk4	245446	10.4401
ENSMUSG00000028020	4258.85	0.468784	3.82e-11	Glrb	14658	10.4179
ENSMUSG00000050029	1202.26	0.658138	4.08e-11	Rap2c	72065	10.3893
ENSMUSG00000044501	193.116	1.29396	4.61e-11	Zfp758	224598	10.3363
ENSMUSG00000022797	9953.33	0.396891	4.61e-11	Tfrc	22042	10.3363
ENSMUSG00000042742	1052.15	0.778779	4.67e-11	Bmt2	101148	10.3307
ENSMUSG00000086503	11943.5	0.439719	4.76e-11	Xist	213742	10.3224
ENSMUSG00000031284	8858.97	0.502649	4.78e-11	Pak3	18481	10.3206
ENSMUSG00000042595	833.894	0.703432	4.96e-11	Fam199x	245622	10.3045
ENSMUSG00000037316	1220.66	0.547216	5.03e-11	Bag4	67384	10.2984
ENSMUSG00000026775	4059.34	0.463006	6.17e-11	Yme1l1	27377	10.2097
ENSMUSG00000029840	13669	0.535947	6.17e-11	Mtpn	14489	10.2097
ENSMUSG00000037458	9670.43	0.417091	6.35e-11	Azin1	54375	10.1972
ENSMUSG00000026434	5018.21	0.490254	6.38e-11	Nucks1	98415	10.1952
ENSMUSG00000020436	3804.93	0.500717	6.38e-11	Gabrg2	14406	10.1952
ENSMUSG00000064061	4692.94	0.502573	6.38e-11	Dzip3	224170	10.1952
ENSMUSG00000025939	2282.65	0.510841	6.96e-11	Ube2w	66799	10.1574
ENSMUSG00000024287	2042.42	0.529596	8.03e-11	Thoc1	225160	10.0953
ENSMUSG00000027351	3028.1	0.476329	8.94e-11	Spred1	114715	10.0487
ENSMUSG00000036093	1757.76	0.540508	9.04e-11	Arl5a	75423	10.0438
ENSMUSG00000090100	2069.72	0.584401	9.32e-11	Ttbk2	140810	10.0306
ENSMUSG00000005583	4582.43	0.498663	1.06e-10	Mef2c	17260	9.97469
ENSMUSG00000090000	1042.71	0.591936	1.08e-10	Ier3ip1	66191	9.96658
ENSMUSG00000028557	5578.96	0.545943	1.08e-10	Rnf11	29864	9.96658
ENSMUSG00000025958	1904.69	0.540047	1.14e-10	Creb1	12912	9.9431
ENSMUSG00000019775	1105.68	0.644928	1.2e-10	Rgs17	56533	9.92082
ENSMUSG00000038174	2299.29	0.64022	1.3e-10	Fam126b	213056	9.88606
ENSMUSG00000026824	2351.14	0.56505	1.52e-10	Kcnj3	16519	9.81816
ENSMUSG00000045210	2707.07	0.617925	1.63e-10	Vcpip1	70675	9.78781
ENSMUSG00000091264	3745.73	0.413739	1.64e-10	Smim13	108934	9.78516
ENSMUSG00000063297	7221.27	0.55679	1.78e-10	Luzp2	233271	9.74958
ENSMUSG00000028211	1526.69	0.599037	1.8e-10	Trp53inp1	60599	9.74473
ENSMUSG00000063663	1047.91	0.660865	2.03e-10	Brwd3	382236	9.6925
ENSMUSG00000047694	1687.52	0.493919	2.31e-10	Yipf6	77929	9.63639
ENSMUSG00000028381	2738.28	0.475679	2.31e-10	Ugcg	22234	9.63639
ENSMUSG00000031438	987.927	0.568634	2.41e-10	Rnf128	66889	9.61798
ENSMUSG00000085438	19306.8	0.402785	2.45e-10	1700020I14Rik	66602	9.61083
ENSMUSG00000008859	3315.93	0.467704	2.76e-10	Rala	56044	9.55909
ENSMUSG00000022788	3300.47	0.600019	2.95e-10	Fgd4	224014	9.53018
ENSMUSG00000025016	6061.95	0.472576	2.95e-10	Tm9sf3	107358	9.53018
ENSMUSG00000054604	2256.62	0.531423	3.02e-10	Cggbp1	106143	9.51999
ENSMUSG00000022523	2566.19	0.585309	3.17e-10	Fgf12	14167	9.49894
ENSMUSG00000039478	1825.21	0.639564	3.42e-10	Micu3	78506	9.46597
ENSMUSG00000044807	2163.03	0.429874	3.44e-10	Zfp354c	30944	9.46344
ENSMUSG00000028252	1389.9	0.646462	3.49e-10	Ccnc	51813	9.45717
ENSMUSG00000020300	3606.77	0.515021	3.49e-10	Cpeb4	67579	9.45717
ENSMUSG00000033964	1202.75	0.621121	3.75e-10	Zbtb41	226470	9.42597
ENSMUSG00000028180	6622.18	0.50014	3.75e-10	Zranb2	53861	9.42597
ENSMUSG00000026753	1944.08	0.469508	4.26e-10	Ppp6c	67857	9.37059
ENSMUSG00000030643	1574.56	0.602831	4.55e-10	Rab30	75985	9.34199
ENSMUSG00000032932	2561.29	0.437399	4.68e-10	Hspa13	110920	9.32975
ENSMUSG00000000560	18748.8	0.489337	4.75e-10	Gabra2	14395	9.32331
ENSMUSG00000026782	6437.44	0.43162	5.28e-10	Abi2	329165	9.27737
ENSMUSG00000040651	1489.39	0.638425	5.33e-10	Tasor	218850	9.27327
ENSMUSG00000041935	2593.24	0.512242	5.64e-10	AW549877	106064	9.24872
ENSMUSG00000028132	1730.66	0.546299	6.24e-10	Tmem56	99887	9.20482
ENSMUSG00000028134	4533.07	0.500097	6.46e-10	Ptbp2	56195	9.18977
ENSMUSG00000028403	2535.28	0.511766	6.51e-10	Zdhhc21	68268	9.18642
ENSMUSG00000027808	2303.36	0.466394	6.59e-10	Serp1	28146	9.18111
ENSMUSG00000031285	11979.2	0.394564	7.07e-10	Dcx	13193	9.15058
ENSMUSG00000052155	2771.92	0.531441	7.16e-10	Acvr2a	11480	9.14509
ENSMUSG00000051285	2241.52	0.507773	7.3e-10	Pcmtd1	319263	9.13668
ENSMUSG00000029211	2904.64	0.466983	7.44e-10	Gabra4	14397	9.12843
ENSMUSG00000071337	3883.17	0.524709	7.44e-10	Tia1	21841	9.12843
ENSMUSG00000043881	1367.21	0.651019	7.44e-10	Kbtbd7	211255	9.12843
ENSMUSG00000046096	1572.08	0.54666	7.51e-10	Mosmo	233812	9.12436
ENSMUSG00000007656	4105.44	0.404956	8.08e-10	Arpp19	59046	9.09259
ENSMUSG00000045767	4309.32	0.427158	8.08e-10	B230219D22Rik	78521	9.09259
ENSMUSG00000045589	8718.58	0.373912	8.43e-10	Frrs1l	230235	9.07417
ENSMUSG00000037400	5290.53	0.416001	1.03e-09	Atp11b	76295	8.98716
ENSMUSG00000075470	1744.63	0.458765	1.05e-09	Alg10b	380959	8.97881
ENSMUSG00000024259	2779.15	0.495495	1.13e-09	Slc25a46	67453	8.94692
ENSMUSG00000019966	864.259	0.62232	1.17e-09	Kitl	17311	8.93181
ENSMUSG00000020719	15153.9	0.358713	1.19e-09	Ddx5	13207	8.92445
ENSMUSG00000074829	365.382	0.809958	1.36e-09	2010315B03Rik	630836	8.86646
ENSMUSG00000025626	1420.12	0.483174	1.37e-09	Phf6	70998	8.86328
ENSMUSG00000034723	7551.1	0.363056	1.39e-09	Tmx4	52837	8.85699
ENSMUSG00000058624	6319.62	0.348115	1.44e-09	Gda	14544	8.84164
ENSMUSG00000022800	3666.01	0.431795	1.47e-09	Fyttd1	69823	8.83268
ENSMUSG00000039470	2378.81	0.487522	1.67e-09	Zdhhc2	70546	8.77728
ENSMUSG00000004771	4970.54	0.522892	1.71e-09	Rab11a	53869	8.767
ENSMUSG00000024097	2671.78	0.444164	1.71e-09	Srsf7	225027	8.767
ENSMUSG00000000058	572.567	0.822066	1.75e-09	Cav2	12390	8.75696
ENSMUSG00000056537	2898.93	0.482963	1.79e-09	Rlim	19820	8.74715
ENSMUSG00000060935	1094.56	0.667705	1.79e-09	Tmem263	103266	8.74715
ENSMUSG00000026159	4993.31	0.431135	1.8e-09	Agfg1	15463	8.74473
ENSMUSG00000026667	13826.6	0.325569	1.87e-09	Uhmk1	16589	8.72816
ENSMUSG00000021597	733.258	0.613975	1.89e-09	Slf1	105377	8.72354
ENSMUSG00000032097	4425.57	0.421888	1.94e-09	Ddx6	13209	8.7122
ENSMUSG00000030557	4356.94	0.47155	1.94e-09	Mef2a	17258	8.7122
ENSMUSG00000043929	392.421	0.787107	2.33e-09	Klhl15	236904	8.63264
ENSMUSG00000036469	3441.03	0.482593	2.45e-09	2021-03-01	72925	8.61083
ENSMUSG00000021596	2185.67	0.447441	2.59e-09	Mctp1	78771	8.5867
ENSMUSG00000024317	484.018	0.751527	2.62e-09	Rnf138	56515	8.5817
ENSMUSG00000043542	2278.26	0.549393	2.65e-09	Zc2hc1a	67306	8.57675
ENSMUSG00000031327	708.996	0.68121	2.83e-09	Chic1	12212	8.54821
ENSMUSG00000027805	16458.8	0.321158	2.87e-09	Pfn2	18645	8.54212
ENSMUSG00000028676	1010.9	0.612132	2.88e-09	Srsf10	14105	8.54061
ENSMUSG00000028546	1853.04	0.621608	2.9e-09	Elavl4	15572	8.5376
ENSMUSG00000048047	1160.99	0.544179	3.46e-09	Zbtb33	56805	8.46092
ENSMUSG00000037236	12326.5	0.45236	3.46e-09	Matr3	17184	8.46092
ENSMUSG00000044288	9649.36	0.370544	3.53e-09	Cnr1	12801	8.45223
ENSMUSG00000024480	481.503	0.767043	3.55e-09	Ap3s1	11777	8.44977
ENSMUSG00000031342	44719.8	0.377943	3.61e-09	Gpm6b	14758	8.44249
ENSMUSG00000028410	2848.88	0.377928	3.85e-09	Dnaja1	15502	8.41454
ENSMUSG00000030275	10631.6	0.395007	3.85e-09	Etnk1	75320	8.41454
ENSMUSG00000052144	921.229	0.553641	3.87e-09	Ppp4r2	232314	8.41229
ENSMUSG00000040929	3435.56	0.504744	4.08e-09	Rfx3	19726	8.38934
ENSMUSG00000021877	4622.44	0.356978	4.23e-09	Arf4	11843	8.37366
ENSMUSG00000053774	1974.1	0.523373	4.24e-09	Ubxn7	224111	8.37263
ENSMUSG00000071266	343.32	0.738492	4.35e-09	Zfp946	74149	8.36151
ENSMUSG00000025531	1891.99	0.601133	4.37e-09	Chm	12662	8.35952
ENSMUSG00000001774	1467.55	0.483591	4.47e-09	Chordc1	66917	8.34969
ENSMUSG00000063887	4951.11	0.408473	5.15e-09	Nlgn1	192167	8.28819
ENSMUSG00000020516	1654.1	0.436694	5.18e-09	Rps6kb1	72508	8.28567
ENSMUSG00000040855	4492.3	0.436994	5.49e-09	Reps2	194590	8.26043
ENSMUSG00000038535	973.982	0.533821	5.9e-09	Zfp280d	235469	8.22915
ENSMUSG00000039361	6421.15	0.377545	6.16e-09	Picalm	233489	8.21042
ENSMUSG00000025104	3777.01	0.453931	6.26e-09	Hdgfl3	29877	8.20343
ENSMUSG00000044067	2781.8	0.549021	6.26e-09	Gpr22	73010	8.20343
ENSMUSG00000022051	2519.02	0.368817	6.33e-09	Bnip3l	12177	8.1986
ENSMUSG00000074698	2106.82	0.403187	6.69e-09	Csnk2a1	12995	8.17457
ENSMUSG00000031517	57277.8	0.475338	6.88e-09	Gpm6a	234267	8.16241
ENSMUSG00000021929	4214.12	0.399831	7.49e-09	Kpna3	16648	8.12552
ENSMUSG00000047187	6315.14	0.445042	7.98e-09	Rab2a	59021	8.098
ENSMUSG00000048834	1988.74	0.518844	8.21e-09	Vstm2a	211739	8.08566
ENSMUSG00000062931	581.721	0.658687	8.58e-09	Zfp938	237411	8.06651
ENSMUSG00000047879	5653.78	0.345049	8.58e-09	Usp14	59025	8.06651
ENSMUSG00000020577	8052.4	0.298672	9.24e-09	Tspan13	66109	8.03433
ENSMUSG00000027763	1226.45	0.632437	9.59e-09	Mbnl1	56758	8.01818
ENSMUSG00000089824	513.524	0.625022	1.01e-08	Rbm12	75710	7.99568
ENSMUSG00000034780	1768.12	0.432258	1.07e-08	B3galt1	26877	7.97062
ENSMUSG00000003929	1278.27	0.4924	1.07e-08	Zfp81	224694	7.97062
ENSMUSG00000032740	4344.27	0.480697	1.08e-08	Ccdc88a	108686	7.96658
ENSMUSG00000017418	1873.37	0.480235	1.08e-08	Arl5b	75869	7.96658
ENSMUSG00000074212	2851.36	0.390559	1.09e-08	Dnajb14	70604	7.96257
ENSMUSG00000063632	2704.51	0.496894	1.12e-08	Sox11	20666	7.95078
ENSMUSG00000039270	6689.82	0.33192	1.16e-08	Megf9	230316	7.93554
ENSMUSG00000031601	2804.22	0.523622	1.22e-08	Cnot7	18983	7.91364
ENSMUSG00000037640	1486.55	0.413411	1.22e-08	Zfp60	22718	7.91364
ENSMUSG00000033417	1828.38	0.391512	1.27e-08	Cacul1	78832	7.8962
ENSMUSG00000046449	7590.14	0.425812	1.29e-08	Nexmif	245555	7.88941
ENSMUSG00000000600	1393.54	0.4864	1.29e-08	Krit1	79264	7.88941
ENSMUSG00000040455	1467.27	0.505869	1.31e-08	Usp45	77593	7.88273
ENSMUSG00000021969	1299.54	0.507684	1.31e-08	Zdhhc20	75965	7.88273
ENSMUSG00000003131	7591.47	0.355321	1.31e-08	Pafah1b2	18475	7.88273
ENSMUSG00000021733	2544.42	0.458887	1.31e-08	Slc4a7	218756	7.88273
ENSMUSG00000032745	2988.94	0.396674	1.37e-08	Gpbp1	73274	7.86328
ENSMUSG00000071862	1886.15	0.523869	1.42e-08	Lrrtm2	107065	7.84771
ENSMUSG00000031309	2307.83	0.394437	1.48e-08	Rps6ka3	110651	7.82974
ENSMUSG00000058799	2771.37	0.359581	1.5e-08	Nap1l1	53605	7.82391
ENSMUSG00000071072	680.011	0.6302	1.53e-08	Ptges3	56351	7.81531
ENSMUSG00000022789	7844.19	0.336272	1.58e-08	Dnm1l	74006	7.80134
ENSMUSG00000025862	2713.04	0.409265	1.66e-08	Stag2	20843	7.77989
ENSMUSG00000021546	4616.59	0.372159	1.68e-08	Hnrnpk	15387	7.77469
ENSMUSG00000045441	917.495	0.577797	1.81e-08	Gprin3	243385	7.74232
ENSMUSG00000020687	2680.21	0.431964	1.88e-08	Cdc27	217232	7.72584
ENSMUSG00000027365	2102.1	0.394052	2.07e-08	Trpm7	58800	7.68403
ENSMUSG00000038301	4841.73	0.370893	2.07e-08	Snx10	71982	7.68403
ENSMUSG00000066798	764.582	0.720196	2.26e-08	Zbtb6	241322	7.64589
ENSMUSG00000040459	3609.93	0.421541	2.35e-08	Arglu1	234023	7.62893
ENSMUSG00000024143	1916.21	0.370751	2.35e-08	Rhoq	104215	7.62893
ENSMUSG00000019817	1889.15	0.542405	2.4e-08	Plagl1	22634	7.61979
ENSMUSG00000036745	5140.09	0.377988	2.4e-08	Ttll7	70892	7.61979
ENSMUSG00000040037	10580.7	0.407947	2.4e-08	Negr1	320840	7.61979
ENSMUSG00000026977	2270.66	0.473775	2.48e-08	2021-03-07	57438	7.60555
ENSMUSG00000021770	5210.48	0.393941	2.53e-08	Samd8	67630	7.59688
ENSMUSG00000028277	3573.55	0.389846	2.63e-08	Ube2j1	56228	7.58004
ENSMUSG00000044071	1707.5	0.401236	2.63e-08	Tafa2	268354	7.58004
ENSMUSG00000039988	3841.6	0.369042	2.64e-08	Ankrd13c	433667	7.5784
ENSMUSG00000010803	2525.24	0.4968	2.65e-08	Gabra1	14394	7.57675
ENSMUSG00000029108	3025.72	0.509256	2.66e-08	Pcdh7	54216	7.57512
ENSMUSG00000063760	1680.75	0.590403	2.71e-08	Rnf217	268291	7.56703
ENSMUSG00000042063	973.333	0.502782	2.81e-08	Zfp386	56220	7.55129
ENSMUSG00000040760	4737.08	0.37732	2.84e-08	Appl1	72993	7.54668
ENSMUSG00000022403	6659.48	0.398234	2.84e-08	St13	70356	7.54668
ENSMUSG00000037234	3631.06	0.504865	2.85e-08	Hook3	320191	7.54516
ENSMUSG00000051223	6200.31	0.338365	3.04e-08	Bzw1	66882	7.51713
ENSMUSG00000025907	2524.35	0.392547	3.09e-08	Rb1cc1	12421	7.51004
ENSMUSG00000027770	3750.26	0.332615	3.09e-08	Dhx36	72162	7.51004
ENSMUSG00000043463	2455.9	0.473707	3.09e-08	Rab9b	319642	7.51004
ENSMUSG00000022270	1194.27	0.439631	3.09e-08	Retreg1	66270	7.51004
ENSMUSG00000026878	6423.29	0.303934	3.14e-08	Rab14	68365	7.50307
ENSMUSG00000073664	888.841	0.591652	3.2e-08	Nbeal1	269198	7.49485
ENSMUSG00000028382	941.39	0.621952	3.26e-08	Ptbp3	230257	7.48678
ENSMUSG00000071180	1417.77	0.496273	3.26e-08	Smim15	75616	7.48678
ENSMUSG00000003031	2828.54	0.501278	3.27e-08	Cdkn1b	12576	7.48545
ENSMUSG00000036990	2463.02	0.416322	3.72e-08	Otud4	73945	7.42946
ENSMUSG00000091337	7964.13	0.817156	3.96e-08	Eid1	58521	7.4023
ENSMUSG00000027782	3452.87	0.402367	4.17e-08	Kpna4	16649	7.37986
ENSMUSG00000049164	527.372	0.590841	4.17e-08	Zfp518a	72672	7.37986
ENSMUSG00000023068	3333.96	0.371808	4.4e-08	Nus1	52014	7.35655
ENSMUSG00000019888	462.696	0.685836	4.43e-08	Mgat4c	67569	7.3536
ENSMUSG00000053702	2411.75	0.509865	4.58e-08	Nebl	74103	7.33913
ENSMUSG00000030077	20838.2	0.412178	5.19e-08	Chl1	12661	7.28483
ENSMUSG00000020794	2289.29	0.431656	6.2e-08	Ube2g1	67128	7.20761
ENSMUSG00000028675	1904.74	0.395153	6.2e-08	Pnrc2	52830	7.20761
ENSMUSG00000027273	26681.9	0.324286	6.32e-08	Snap25	20614	7.19928
ENSMUSG00000025234	3173.78	0.34831	6.41e-08	Arih1	23806	7.19314
ENSMUSG00000051674	3808.51	0.351659	6.68e-08	Dcun1d4	100737	7.17522
ENSMUSG00000015733	7615.9	0.343122	6.87e-08	Capza2	12343	7.16304
ENSMUSG00000024068	2934.18	0.437129	6.98e-08	Spast	50850	7.15614
ENSMUSG00000038323	662.974	0.689312	6.99e-08	1700066M21Rik	73467	7.15552
ENSMUSG00000033014	2982.76	0.358847	7.29e-08	Trim33	94093	7.13727
ENSMUSG00000016534	3065.63	0.372776	7.41e-08	Lamp2	16784	7.13018
ENSMUSG00000011831	1830.5	0.396057	7.68e-08	Evi5	14020	7.11464
ENSMUSG00000027804	1716.96	0.412641	7.79e-08	Ppid	67738	7.10846
ENSMUSG00000034160	11235.6	0.289559	7.82e-08	Ogt	108155	7.10679
ENSMUSG00000029203	4139.82	0.364656	7.86e-08	Ube2k	53323	7.10458
ENSMUSG00000026064	589.754	0.71215	8.2e-08	Ptp4a1	19243	7.08619
ENSMUSG00000073295	1274.55	0.517134	9.44e-08	Nudt11	58242	7.02503
ENSMUSG00000049583	10977.6	0.386929	9.99e-08	Grm5	108071	7.00043
ENSMUSG00000031754	722.584	0.568107	1.02e-07	Nudt21	68219	6.9914
ENSMUSG00000040896	4390.82	0.314781	1.07e-07	Kcnd3	56543	6.97062
ENSMUSG00000033543	815.68	0.484312	1.16e-07	Gtf2a2	235459	6.93554
ENSMUSG00000036095	6528.92	0.410686	1.17e-07	Dgkb	217480	6.93181
ENSMUSG00000032262	2492.31	0.383819	1.17e-07	Elovl4	83603	6.93181
ENSMUSG00000063273	2199.14	0.416734	1.21e-07	Naa15	74838	6.91721
ENSMUSG00000036943	1076.23	0.4944	1.22e-07	Rab8b	235442	6.91364
ENSMUSG00000030629	1102.97	0.416118	1.23e-07	Zfand6	65098	6.91009
ENSMUSG00000018800	1902.2	0.450287	1.3e-07	Abca5	217265	6.88606
ENSMUSG00000020362	1923.88	0.452576	1.33e-07	Cnot6	104625	6.87615
ENSMUSG00000024276	1706.81	0.411254	1.39e-07	Zfp397	69256	6.85699
ENSMUSG00000021111	3928.6	0.308877	1.44e-07	Papola	18789	6.84164
ENSMUSG00000028986	4014.69	0.358366	1.45e-07	Klhl7	52323	6.83863
ENSMUSG00000021589	1375.66	0.438332	1.46e-07	Rhobtb3	73296	6.83565
ENSMUSG00000020590	3217.87	0.339915	1.46e-07	Snx13	217463	6.83565
ENSMUSG00000026107	1565.21	0.489329	1.47e-07	Nabp1	109019	6.83268
ENSMUSG00000009575	9837.28	0.278061	1.47e-07	Cbx5	12419	6.83268
ENSMUSG00000027823	2447.35	0.446272	1.49e-07	Gmps	229363	6.82681
ENSMUSG00000021669	1566.38	0.434629	1.49e-07	Col4a3bp	68018	6.82681
ENSMUSG00000064345	91401.5	0.814532	1.49e-07	ND2	17717	6.82681
ENSMUSG00000028522	922.363	0.546553	1.5e-07	Mier1	71148	6.82391
ENSMUSG00000064370	214030	0.271779	1.5e-07	CYTB	17711	6.82391
ENSMUSG00000044149	1141.96	0.436805	1.53e-07	Nkrf	77286	6.81531
ENSMUSG00000020745	24603.1	0.337512	1.58e-07	Pafah1b1	18472	6.80134
ENSMUSG00000042363	2898.89	0.337412	1.62e-07	Lgalsl	216551	6.79048
ENSMUSG00000025609	3057.38	0.330432	1.63e-07	Mkln1	27418	6.78781
ENSMUSG00000109321	175.651	1.02564	1.69e-07	A330076H08Rik	320026	6.77211
ENSMUSG00000019877	28902.2	0.367401	1.71e-07	Serinc1	56442	6.767
ENSMUSG00000020132	1552.07	0.463972	1.72e-07	Rab21	216344	6.76447
ENSMUSG00000028261	866.965	0.495156	1.76e-07	Ndufaf4	68493	6.75449
ENSMUSG00000008489	3604.7	0.429903	1.91e-07	Elavl2	15569	6.71897
ENSMUSG00000030226	4108.73	0.350266	1.91e-07	Lmo3	109593	6.71897
ENSMUSG00000073293	626.305	0.69278	1.98e-07	Nudt10	102954	6.70333
ENSMUSG00000026469	4980.86	0.323286	2.02e-07	Xpr1	19775	6.69465
ENSMUSG00000029571	5890.02	0.455004	2.04e-07	Tmem106b	71900	6.69037
ENSMUSG00000031333	1088.92	0.563668	2.06e-07	Abcb7	11306	6.68613
ENSMUSG00000030846	2543.05	0.447148	2.06e-07	Tial1	21843	6.68613
ENSMUSG00000025326	3835.4	0.898783	2.15e-07	Ube3a	22215	6.66756
ENSMUSG00000034297	2954.52	0.463386	2.15e-07	Med13	327987	6.66756
ENSMUSG00000021730	2178.78	0.476375	2.18e-07	Hcn1	15165	6.66154
ENSMUSG00000044647	4042.52	0.365506	2.18e-07	Csrnp3	77771	6.66154
ENSMUSG00000027104	3627.2	0.383182	2.18e-07	Atf2	11909	6.66154
ENSMUSG00000025529	887.627	0.511548	2.2e-07	Zfp711	245595	6.65758
ENSMUSG00000033676	13420.9	0.326364	2.2e-07	Gabrb3	14402	6.65758
ENSMUSG00000020954	2212.24	0.400577	2.23e-07	Strn3	94186	6.6517
ENSMUSG00000019132	8063.74	0.311651	2.24e-07	BC005537	79555	6.64975
ENSMUSG00000070923	2491.77	0.456607	2.36e-07	Klhl9	242521	6.62709
ENSMUSG00000052681	2667.47	0.473684	2.44e-07	Rap1b	215449	6.61261
ENSMUSG00000027177	2353.33	0.396704	2.45e-07	Hipk3	15259	6.61083
ENSMUSG00000023845	1820.09	0.504229	2.55e-07	Lnpep	240028	6.59346
ENSMUSG00000075318	13322.2	0.317333	2.56e-07	Scn2a	110876	6.59176
ENSMUSG00000020594	6071.27	0.338947	2.59e-07	Pum2	80913	6.5867
ENSMUSG00000040536	1499.24	0.448698	2.62e-07	Necab1	69352	6.5817
ENSMUSG00000041459	4430.31	0.416095	2.68e-07	Tardbp	230908	6.57187
ENSMUSG00000004319	7712.58	0.287676	2.69e-07	Clcn3	12725	6.57025
ENSMUSG00000022811	2927.93	0.381645	2.69e-07	Zfp148	22661	6.57025
ENSMUSG00000026739	968.265	0.467749	2.76e-07	Bmi1	12151	6.55909
ENSMUSG00000054693	2915.72	0.329647	2.86e-07	Adam10	11487	6.54363
ENSMUSG00000060681	5423.61	0.299162	2.9e-07	Slc9a6	236794	6.5376
ENSMUSG00000042444	2659.89	0.376562	2.91e-07	Mindy2	235461	6.53611
ENSMUSG00000040321	1271.61	0.415402	2.99e-07	Zfp770	228491	6.52433
ENSMUSG00000074781	3273.81	0.367787	3e-07	Ube2n	93765	6.52288
ENSMUSG00000029817	3039.15	0.351849	3.06e-07	Tra2a	101214	6.51428
ENSMUSG00000025240	2339.89	0.443323	3.08e-07	Sacm1l	83493	6.51145
ENSMUSG00000022507	2044.24	0.360342	3.28e-07	1810013L24Rik	69053	6.48413
ENSMUSG00000043004	24197.7	0.397339	3.33e-07	Gng2	14702	6.47756
ENSMUSG00000062373	1760.39	0.460986	3.36e-07	Tmem65	74868	6.47366
ENSMUSG00000031246	8262.5	0.952358	3.44e-07	Sh3bgrl	56726	6.46344
ENSMUSG00000042133	1885.91	0.482234	3.5e-07	Ppig	228005	6.45593
ENSMUSG00000059474	874.001	0.476142	3.5e-07	Mbtd1	103537	6.45593
ENSMUSG00000064363	67469.8	0.343071	3.54e-07	ND4	17719	6.451
ENSMUSG00000031600	2051.73	0.459954	3.79e-07	Vps37a	52348	6.42136
ENSMUSG00000035236	4305.62	0.791121	3.83e-07	Scai	320271	6.4168
ENSMUSG00000028484	5598.05	0.397172	3.87e-07	Psip1	101739	6.41229
ENSMUSG00000016921	3853.23	0.341058	3.95e-07	Srsf6	67996	6.4034
ENSMUSG00000005371	3600.16	0.336829	4.06e-07	Fbxo11	225055	6.39147
ENSMUSG00000048040	1168.4	1.22504	4.1e-07	Arxes2	76976	6.38722
ENSMUSG00000027993	12734.5	0.314575	4.27e-07	Trim2	80890	6.36957
ENSMUSG00000047368	1032.93	0.565541	4.37e-07	Abhd17b	226016	6.35952
ENSMUSG00000014226	2288.47	0.359716	4.41e-07	Cacybp	12301	6.35556
ENSMUSG00000037416	2709.29	0.380615	4.43e-07	Dmxl1	240283	6.3536
ENSMUSG00000055430	2360.8	0.361351	4.47e-07	Nap1l5	58243	6.34969
ENSMUSG00000033981	25708.8	0.371021	4.54e-07	Gria2	14800	6.34294
ENSMUSG00000038127	3397.79	0.390221	4.54e-07	Ccdc50	67501	6.34294
ENSMUSG00000022752	8618.1	0.363404	4.73e-07	Tomm70a	28185	6.32514
ENSMUSG00000037475	2808.65	0.462934	4.85e-07	Thoc2	331401	6.31426
ENSMUSG00000038538	2237.06	0.364468	4.85e-07	Ubn2	320538	6.31426
ENSMUSG00000057835	156.148	0.931392	4.85e-07	Zfp119a	104349	6.31426
ENSMUSG00000038128	9867.33	0.381269	4.88e-07	Camk4	12326	6.31158
ENSMUSG00000020149	6973.96	0.319108	4.9e-07	Rab1a	19324	6.3098
ENSMUSG00000017291	7819.09	0.433445	4.9e-07	Taok1	216965	6.3098
ENSMUSG00000022338	1465.22	0.392695	4.9e-07	Eny2	223527	6.3098
ENSMUSG00000031242	2375.33	0.467511	5e-07	2610002M06Rik	67028	6.30103
ENSMUSG00000021510	473.996	0.606141	5.15e-07	Zfp729a	212281	6.28819
ENSMUSG00000024294	6199.41	0.411436	5.15e-07	Mib1	225164	6.28819
ENSMUSG00000048022	1554.41	0.443046	5.19e-07	Tmem229a	319832	6.28483
ENSMUSG00000029238	3626.72	0.360955	5.25e-07	Clock	12753	6.27984
ENSMUSG00000017485	6558.81	0.294597	5.26e-07	Top2b	21974	6.27901
ENSMUSG00000022656	4569.59	0.338827	5.3e-07	Nectin3	58998	6.27572
ENSMUSG00000049047	424.789	0.647663	5.32e-07	Armcx3	71703	6.27409
ENSMUSG00000060510	2292.23	0.376143	5.32e-07	Zfp266	77519	6.27409
ENSMUSG00000049630	493.585	0.60156	5.5e-07	C1ql3	227580	6.25964
ENSMUSG00000019878	1365.33	0.37335	5.51e-07	Hsf2	15500	6.25885
ENSMUSG00000000787	7435.99	0.284839	5.58e-07	Ddx3x	13205	6.25337
ENSMUSG00000089774	1336.12	0.421821	5.67e-07	Slc5a3	53881	6.24642
ENSMUSG00000025899	1549.71	0.378975	5.81e-07	Alkbh8	67667	6.23582
ENSMUSG00000029212	14177.9	0.36695	5.97e-07	Gabrb1	14400	6.22403
ENSMUSG00000057561	1679.71	0.401573	5.97e-07	Eif1a	13664	6.22403
ENSMUSG00000025245	897.231	0.473229	6.05e-07	Lztfl1	93730	6.21824
ENSMUSG00000054814	3653.29	0.355979	6.07e-07	Usp46	69727	6.21681
ENSMUSG00000037808	646.458	0.585292	6.07e-07	Fam76b	72826	6.21681
ENSMUSG00000027599	2459.48	0.356512	6.35e-07	Armc1	74252	6.19723
ENSMUSG00000037434	1396.25	0.412535	6.38e-07	Slc30a1	22782	6.19518
ENSMUSG00000028232	1147.41	0.417192	6.38e-07	Tmem68	72098	6.19518
ENSMUSG00000047412	702.538	0.551481	6.38e-07	Zbtb44	235132	6.19518
ENSMUSG00000020152	9129.19	0.29599	6.38e-07	Actr2	66713	6.19518
ENSMUSG00000024072	1071.99	0.430677	6.41e-07	Yipf4	67864	6.19314
ENSMUSG00000025777	6877.86	0.340194	6.54e-07	Gdap1	14545	6.18442
ENSMUSG00000002413	3564.88	0.359353	6.63e-07	Braf	109880	6.17849
ENSMUSG00000025551	1518.52	0.431654	6.66e-07	Fgf14	14169	6.17653
ENSMUSG00000024491	1205.06	0.439142	6.89e-07	Rbm27	225432	6.16178
ENSMUSG00000022139	3668.64	0.45192	7.18e-07	Mbnl2	105559	6.14388
ENSMUSG00000031007	7628.59	0.361719	7.3e-07	Atp6ap2	70495	6.13668
ENSMUSG00000007617	2307.86	0.410573	7.3e-07	Homer1	26556	6.13668
ENSMUSG00000021700	12828.9	0.313595	7.43e-07	Rab3c	67295	6.12901
ENSMUSG00000022309	688.526	0.499578	8e-07	Angpt1	11600	6.09691
ENSMUSG00000039704	1983.7	0.411645	8e-07	Lmbrd2	320506	6.09691
ENSMUSG00000020950	2506.21	0.33777	8.1e-07	Foxg1	15228	6.09151
ENSMUSG00000013663	5602.7	0.429773	8.82e-07	Pten	19211	6.05453
ENSMUSG00000047141	853.911	0.587686	8.84e-07	Zfp654	72020	6.05355
ENSMUSG00000021248	2955.71	0.327873	8.85e-07	Tmed10	68581	6.05306
ENSMUSG00000062184	1202.38	0.40835	9e-07	Hs6st2	50786	6.04576
ENSMUSG00000069114	609.238	0.606965	9.06e-07	Zbtb10	229055	6.04287
ENSMUSG00000031201	1063.2	0.466067	9.15e-07	Brcc3	210766	6.03858
ENSMUSG00000016308	1309.68	0.390834	9.24e-07	Ube2a	22209	6.03433
ENSMUSG00000078861	188.852	0.898158	9.33e-07	Zfp931	353208	6.03012
ENSMUSG00000032253	2410.6	0.481227	9.33e-07	Phip	83946	6.03012
ENSMUSG00000028552	10331.6	0.336608	9.45e-07	Eps15	13858	6.02457
ENSMUSG00000031095	1412.14	0.386392	9.63e-07	Cul4b	72584	6.01637
ENSMUSG00000024172	1092.2	0.460843	9.63e-07	St6gal2	240119	6.01637
ENSMUSG00000062209	2056.56	0.434422	9.79e-07	Erbb4	13869	6.00922
ENSMUSG00000031715	785.989	0.545302	9.92e-07	Smarca5	93762	6.00349
ENSMUSG00000028156	1324.67	0.396082	1e-06	Eif4e	13684	6
ENSMUSG00000004360	3136.7	0.349539	1e-06	9330159F19Rik	212448	6
ENSMUSG00000037608	5183.27	0.338491	1.01e-06	Bclaf1	72567	5.99568
ENSMUSG00000033319	1193.25	0.416274	1.02e-06	Fem1c	240263	5.9914
ENSMUSG00000040520	1502.3	0.507911	1.02e-06	Manea	242362	5.9914
ENSMUSG00000022307	5440.63	0.315492	1.03e-06	Oxr1	170719	5.98716
ENSMUSG00000078185	564.958	0.579483	1.05e-06	Chml	12663	5.97881
ENSMUSG00000050953	4248.76	0.303111	1.05e-06	Gja1	14609	5.97881
ENSMUSG00000030465	32795	0.332766	1.08e-06	Psd3	234353	5.96658
ENSMUSG00000058093	386.371	0.594152	1.09e-06	Zfp729b	100416706	5.96257
ENSMUSG00000066232	5576.32	0.331705	1.1e-06	Ipo7	233726	5.95861
ENSMUSG00000014956	9356.28	0.737439	1.11e-06	Ppp1cb	19046	5.95468
ENSMUSG00000034021	3587.78	0.329775	1.13e-06	Pds5b	100710	5.94692
ENSMUSG00000056258	6860	0.300348	1.14e-06	Kcnq3	110862	5.9431
ENSMUSG00000022812	11898.6	0.309867	1.16e-06	Gsk3b	56637	5.93554
ENSMUSG00000040648	1166.06	0.412126	1.19e-06	Ppip5k2	227399	5.92445
ENSMUSG00000069132	248.343	0.86506	1.19e-06	Nxph2	18232	5.92445
ENSMUSG00000039782	1715.75	0.493787	1.19e-06	Cpeb2	231207	5.92445
ENSMUSG00000024581	5461.81	0.301025	1.22e-06	Napg	108123	5.91364
ENSMUSG00000029729	2472.17	0.359509	1.23e-06	Zkscan1	74570	5.91009
ENSMUSG00000026718	2689.89	0.308757	1.26e-06	Stam	20844	5.89963
ENSMUSG00000046442	15337.4	0.266856	1.29e-06	Ppm1e	320472	5.88941
ENSMUSG00000002107	23139.5	0.346312	1.3e-06	Celf2	14007	5.88606
ENSMUSG00000102976	309.84	0.873491	1.31e-06	Zc3h11a	70579	5.88273
ENSMUSG00000040022	2165.98	0.405483	1.32e-06	Rab11fip2	74998	5.87943
ENSMUSG00000031292	9447.03	0.294968	1.33e-06	Cdkl5	382253	5.87615
ENSMUSG00000020570	887.431	0.515053	1.33e-06	Sypl	19027	5.87615
ENSMUSG00000048355	941.266	0.574744	1.33e-06	Arxes1	76219	5.87615
ENSMUSG00000074746	2076.52	0.368584	1.33e-06	Pdzd8	107368	5.87615
ENSMUSG00000024091	3891.48	0.295479	1.34e-06	Vapa	30960	5.8729
ENSMUSG00000090063	539.758	0.53823	1.37e-06	Dlx6os1	320038	5.86328
ENSMUSG00000036402	1955.14	0.338024	1.49e-06	Gng12	14701	5.82681
ENSMUSG00000002997	2932.55	0.418292	1.58e-06	Prkar2b	19088	5.80134
ENSMUSG00000082229	2137.56	0.356859	1.68e-06	Nap1l2	17954	5.77469
ENSMUSG00000074415	1240.21	0.48402	1.7e-06	3110039I08Rik	73144	5.76955
ENSMUSG00000022200	2303.54	0.381713	1.72e-06	Golph3	66629	5.76447
ENSMUSG00000027834	3456.95	0.348501	1.73e-06	Serpini1	20713	5.76195
ENSMUSG00000026276	3157.62	0.327876	1.74e-06	2021-09-02	18000	5.75945
ENSMUSG00000042105	8545.98	0.289373	1.74e-06	Inpp5f	101490	5.75945
ENSMUSG00000030105	7188.51	0.304291	1.78e-06	Arl8b	67166	5.74958
ENSMUSG00000034349	819.676	0.454909	1.81e-06	Smc4	70099	5.74232
ENSMUSG00000024360	3544.73	0.292694	1.81e-06	Etf1	225363	5.74232
ENSMUSG00000020671	8287.24	0.350995	1.81e-06	Rab10	19325	5.74232
ENSMUSG00000028161	22114	0.33202	1.82e-06	Ppp3ca	19055	5.73993
ENSMUSG00000037857	2209.58	0.448683	1.83e-06	Nufip2	68564	5.73755
ENSMUSG00000026730	922.708	0.969277	1.9e-06	Pter	19212	5.72125
ENSMUSG00000031137	13976.1	0.246568	2.01e-06	Fgf13	14168	5.6968
ENSMUSG00000022292	838.255	0.521299	2.03e-06	Rrm2b	382985	5.6925
ENSMUSG00000036707	4875.95	0.299767	2.04e-06	Cab39	12283	5.69037
ENSMUSG00000028788	3797.26	0.285802	2.08e-06	Ptp4a2	19244	5.68194
ENSMUSG00000090946	777.387	0.458256	2.12e-06	Ccdc71l	72123	5.67366
ENSMUSG00000027132	247.098	0.735089	2.13e-06	Katnbl1	72425	5.67162
ENSMUSG00000022378	4540.26	0.315913	2.17e-06	Fam49b	223601	5.66354
ENSMUSG00000016559	3776.66	0.319588	2.26e-06	H3f3b	15081	5.64589
ENSMUSG00000040774	1065.17	0.387548	2.28e-06	Cept1	99712	5.64207
ENSMUSG00000027108	3227	0.334455	2.32e-06	Ola1	67059	5.63451
ENSMUSG00000029629	2621.69	0.410396	2.34e-06	Phf14	75725	5.63078
ENSMUSG00000022285	13369.8	0.348014	2.39e-06	Ywhaz	22631	5.6216
ENSMUSG00000005089	62025.8	0.284088	2.44e-06	Slc1a2	20511	5.61261
ENSMUSG00000038628	1805.05	0.331488	2.44e-06	Polr3k	67005	5.61261
ENSMUSG00000059003	3653.87	0.382821	2.45e-06	Grin2a	14811	5.61083
ENSMUSG00000055436	3782.41	0.355909	2.46e-06	Srsf11	69207	5.60906
ENSMUSG00000044349	6829.55	0.369392	2.47e-06	Snhg11	319317	5.6073
ENSMUSG00000039735	5761.13	0.358638	2.53e-06	Fnbp1l	214459	5.59688
ENSMUSG00000028207	4963.49	0.324677	2.53e-06	Asph	65973	5.59688
ENSMUSG00000042599	1519.7	0.422827	2.53e-06	Kdm7a	338523	5.59688
ENSMUSG00000027706	4525.67	0.37506	2.71e-06	Sec62	69276	5.56703
ENSMUSG00000036499	1738.15	0.394221	2.71e-06	Eea1	216238	5.56703
ENSMUSG00000039630	15983.6	0.25304	2.73e-06	Hnrnpu	51810	5.56384
ENSMUSG00000046994	1037.92	0.422341	2.8e-06	Mars2	212679	5.55284
ENSMUSG00000029684	1885.45	0.41267	2.8e-06	Wasl	73178	5.55284
ENSMUSG00000074733	719.788	0.483498	2.83e-06	Zfp950	414758	5.54821
ENSMUSG00000021719	4302.67	0.336584	2.85e-06	Rgs7bp	52882	5.54516
ENSMUSG00000046351	1713.71	0.404674	2.87e-06	Zfp322a	218100	5.54212
ENSMUSG00000035967	1445.26	0.383755	2.87e-06	Ints6l	236790	5.54212
ENSMUSG00000031885	1292.19	0.504072	2.87e-06	Cbfb	12400	5.54212
ENSMUSG00000069049	1432.95	0.389275	2.88e-06	Eif2s3y	26908	5.54061
ENSMUSG00000053477	26842.8	0.341676	2.95e-06	Tcf4	21413	5.53018
ENSMUSG00000028034	4504.55	0.402958	2.96e-06	Fubp1	51886	5.52871
ENSMUSG00000028248	6081.55	0.310932	2.96e-06	Pnisr	66625	5.52871
ENSMUSG00000030704	12955.2	0.366547	2.98e-06	Rab6a	19346	5.52578
ENSMUSG00000024935	2527.4	0.319247	2.98e-06	Slc1a1	20510	5.52578
ENSMUSG00000108621	783.217	0.494557	2.99e-06	Gm33989	102637087	5.52433
ENSMUSG00000048379	601.573	0.541273	3.01e-06	Socs4	67296	5.52143
ENSMUSG00000027957	565.896	0.605039	3.12e-06	Slc35a3	229782	5.50585
ENSMUSG00000004843	1777.74	0.364691	3.15e-06	Chmp2b	68942	5.50169
ENSMUSG00000024290	953.666	0.498655	3.15e-06	Rock1	19877	5.50169
ENSMUSG00000041716	316.037	0.719695	3.16e-06	Gm20604	100859931	5.50031
ENSMUSG00000071708	2262.05	0.370176	3.22e-06	Sms	20603	5.49214
ENSMUSG00000055022	25733.2	0.251597	3.25e-06	Cntn1	12805	5.48812
ENSMUSG00000048388	9811.97	0.259891	3.27e-06	Fam171b	241520	5.48545
ENSMUSG00000021687	8257.84	0.298691	3.36e-06	Scamp1	107767	5.47366
ENSMUSG00000032307	743.421	0.516035	3.41e-06	Ube2q2	109161	5.46725
ENSMUSG00000000581	1481.58	0.506784	3.43e-06	C1d	57316	5.46471
ENSMUSG00000033342	3092.34	0.424443	3.55e-06	Plppr5	75769	5.44977
ENSMUSG00000035898	1050.21	0.452962	3.56e-06	Uba6	231380	5.44855
ENSMUSG00000006699	10743.2	0.261855	3.71e-06	Cdc42	12540	5.43063
ENSMUSG00000027739	820.082	0.441763	3.72e-06	Rab33b	19338	5.42946
ENSMUSG00000058690	5830.56	0.322503	3.79e-06	Ccser2	72972	5.42136
ENSMUSG00000040423	1669.19	0.435222	3.92e-06	Rc3h1	381305	5.40671
ENSMUSG00000048482	1948.83	0.363409	4.04e-06	Bdnf	12064	5.39362
ENSMUSG00000028222	1697.17	0.357596	4.09e-06	Calb1	12307	5.38828
ENSMUSG00000019920	2104.87	0.415225	4.14e-06	Lims1	110829	5.383
ENSMUSG00000023025	1107.56	0.509306	4.26e-06	Larp4	207214	5.37059
ENSMUSG00000027630	2281.31	0.420414	4.3e-06	Tbl1xr1	81004	5.36653
ENSMUSG00000024993	1531.49	0.408022	4.41e-06	Fam45a	67894	5.35556
ENSMUSG00000063659	16650.8	0.286092	4.57e-06	Zbtb18	30928	5.34008
ENSMUSG00000069237	2150.03	0.392643	4.7e-06	Fam8a1	97863	5.3279
ENSMUSG00000041846	958.225	0.482253	4.73e-06	Ppp4r3a	68734	5.32514
ENSMUSG00000037826	986.054	0.410685	4.8e-06	Ppm1k	243382	5.31876
ENSMUSG00000056004	1328.91	0.404579	5e-06	9330182L06Rik	231014	5.30103
ENSMUSG00000026696	2097.24	0.383651	5e-06	Vamp4	53330	5.30103
ENSMUSG00000045180	3568.83	0.317848	5.06e-06	Shroom2	110380	5.29585
ENSMUSG00000027708	602.827	0.548161	5.06e-06	Dcun1d1	114893	5.29585
ENSMUSG00000026103	12043.1	0.29382	5.08e-06	Gls	14660	5.29414
ENSMUSG00000033111	965.331	0.416219	5.08e-06	3830406C13Rik	218734	5.29414
ENSMUSG00000090641	279.891	0.641492	5.08e-06	Zfp712	78251	5.29414
ENSMUSG00000005802	1469.12	0.379591	5.13e-06	Slc30a4	22785	5.28988
ENSMUSG00000032423	3158.06	0.846848	5.19e-06	Syncrip	56403	5.28483
ENSMUSG00000057134	1256.08	0.367204	5.3e-06	Ado	211488	5.27572
ENSMUSG00000042271	502.023	0.552596	5.38e-06	Nxt2	237082	5.26922
ENSMUSG00000024477	506.612	0.51945	5.44e-06	Pggt1b	225467	5.2644
ENSMUSG00000025935	1171.33	0.439299	5.5e-06	Tram1	72265	5.25964
ENSMUSG00000074093	971.518	0.389984	5.62e-06	Svip	75744	5.25026
ENSMUSG00000003746	726.712	0.492762	5.62e-06	Man1a	17155	5.25026
ENSMUSG00000042323	2953.99	0.343645	5.81e-06	Pbrm1	66923	5.23582
ENSMUSG00000007682	3819.84	0.329407	5.81e-06	Dio2	13371	5.23582
ENSMUSG00000063894	1096.39	0.388041	5.91e-06	Zkscan8	93681	5.22841
ENSMUSG00000027366	1526.38	0.412172	6.2e-06	Sppl2a	66552	5.20761
ENSMUSG00000045103	2248.37	0.388163	6.25e-06	Dmd	13405	5.20412
ENSMUSG00000092083	996.734	0.489974	6.3e-06	Kcnb2	98741	5.20066
ENSMUSG00000050192	1357.94	0.452816	6.59e-06	Eif5a2	208691	5.18111
ENSMUSG00000037062	4401.89	0.339421	6.65e-06	Sh3glb1	54673	5.17718
ENSMUSG00000000001	2543.79	0.284675	6.73e-06	Gnai3	14679	5.17198
ENSMUSG00000030002	2607	0.290372	7.09e-06	Dusp11	72102	5.14935
ENSMUSG00000021301	4284.67	0.349322	7.18e-06	Hecw1	94253	5.14388
ENSMUSG00000050310	1679.36	0.334437	7.21e-06	Rictor	78757	5.14206
ENSMUSG00000024241	2745.13	0.372596	7.23e-06	Sos1	20662	5.14086
ENSMUSG00000021945	4025.81	0.28879	7.31e-06	Zmym2	76007	5.13608
ENSMUSG00000020659	680.264	0.478528	7.35e-06	Cbll1	104836	5.13371
ENSMUSG00000026771	616.05	0.595918	7.39e-06	Spopl	76857	5.13136
ENSMUSG00000078851	619.781	0.45067	7.42e-06	Hist3h2a	319162	5.1296
ENSMUSG00000025094	112.047	1.05118	7.43e-06	Slc18a2	214084	5.12901
ENSMUSG00000013736	1107.54	0.366478	7.58e-06	Trnt1	70047	5.12033
ENSMUSG00000008575	9698.76	0.377077	7.64e-06	Nfib	18028	5.11691
ENSMUSG00000034317	167.992	0.841037	7.73e-06	Trim59	66949	5.11182
ENSMUSG00000027534	997.523	0.470635	7.94e-06	Snx16	74718	5.10018
ENSMUSG00000025323	789.326	0.537398	7.94e-06	Sp4	20688	5.10018
ENSMUSG00000024576	10737.3	0.341317	8.04e-06	Csnk1a1	93687	5.09474
ENSMUSG00000026349	2261.61	0.369634	8.05e-06	Ccnt2	72949	5.0942
ENSMUSG00000024695	3983.9	0.282364	8.05e-06	Zfp91	109910	5.0942
ENSMUSG00000057715	2137.54	0.415892	8.09e-06	A830018L16Rik	320492	5.09205
ENSMUSG00000031229	9941.31	0.348635	8.09e-06	Atrx	22589	5.09205
ENSMUSG00000044308	8729.92	0.282552	8.29e-06	Ubr3	68795	5.08145
ENSMUSG00000055373	2488.24	1.01375	8.29e-06	Fut9	14348	5.08145
ENSMUSG00000027660	2224.94	0.356144	8.39e-06	Skil	20482	5.07624
ENSMUSG00000067931	806.342	0.503324	8.89e-06	Zfp948	381066	5.0511
ENSMUSG00000059423	505.208	0.581884	8.95e-06	Zfp933	242747	5.04818
ENSMUSG00000036790	1305.01	0.392647	8.95e-06	Slitrk2	245450	5.04818
ENSMUSG00000011960	1749.06	0.341779	9e-06	Ccnt1	12455	5.04576
ENSMUSG00000001891	2511.06	0.281113	9.15e-06	Ugp2	216558	5.03858
ENSMUSG00000041180	1416.23	0.344077	9.7e-06	Hectd2	226098	5.01323
ENSMUSG00000020863	5951.14	0.289611	9.9e-06	Luc7l3	67684	5.00436
ENSMUSG00000037674	1560.23	0.402944	1.02e-05	Rfx7	319758	4.9914
ENSMUSG00000026915	4953.82	0.324523	1.05e-05	Strbp	20744	4.97881
ENSMUSG00000044365	441.62	0.566123	1.05e-05	Cxxc4	319478	4.97881
ENSMUSG00000056153	424.307	0.696107	1.06e-05	Socs6	54607	4.97469
ENSMUSG00000091896	929.525	0.466962	1.06e-05	Ube2d2a	56550	4.97469
ENSMUSG00000064329	1314.53	0.365622	1.08e-05	Scn1a	20265	4.96658
ENSMUSG00000062257	15381.6	0.296045	1.09e-05	Opcml	330908	4.96257
ENSMUSG00000056342	7054.63	0.295876	1.09e-05	Usp34	17847	4.96257
ENSMUSG00000024479	1631.17	0.38378	1.15e-05	Mal2	105853	4.9393
ENSMUSG00000034910	3362.49	0.284071	1.16e-05	Pygo1	72135	4.93554
ENSMUSG00000029569	658.181	0.449621	1.16e-05	Tmem168	101118	4.93554
ENSMUSG00000004980	14507.3	0.328874	1.17e-05	Hnrnpa2b1	53379	4.93181
ENSMUSG00000046314	943.291	0.474805	1.2e-05	Stxbp6	217517	4.92082
ENSMUSG00000052479	170.311	0.942876	1.23e-05	A330008L17Rik	234624	4.91009
ENSMUSG00000021796	2397.26	0.339115	1.24e-05	Bmpr1a	12166	4.90658
ENSMUSG00000031647	2263.6	0.370982	1.24e-05	Mfap3l	71306	4.90658
ENSMUSG00000058355	4920.61	0.299762	1.24e-05	Abce1	24015	4.90658
ENSMUSG00000056296	2036.38	0.378419	1.25e-05	Synpr	72003	4.90309
ENSMUSG00000032878	2828.87	0.32902	1.25e-05	Ccdc85a	216613	4.90309
ENSMUSG00000054387	2606.21	0.296428	1.28e-05	Mdm4	17248	4.89279
ENSMUSG00000028572	2030.9	0.337144	1.28e-05	Hook1	77963	4.89279
ENSMUSG00000032328	10749.9	0.628294	1.28e-05	Tmem30a	69981	4.89279
ENSMUSG00000024423	4234.35	0.287175	1.29e-05	Impact	16210	4.88941
ENSMUSG00000025894	829.804	0.403683	1.31e-05	Aasdhppt	67618	4.88273
ENSMUSG00000034120	2876.19	0.30721	1.32e-05	Srsf2	20382	4.87943
ENSMUSG00000068134	499.967	0.53147	1.35e-05	Zfp120	104348	4.86967
ENSMUSG00000019699	9476.25	0.235937	1.35e-05	Akt3	23797	4.86967
ENSMUSG00000097392	608.589	0.482783	1.37e-05	D930016D06Rik	100662	4.86328
ENSMUSG00000043154	1762.13	0.344968	1.38e-05	Ppp2r3a	235542	4.86012
ENSMUSG00000047996	116.131	1.21106	1.43e-05	Prrg1	546336	4.84466
ENSMUSG00000047446	1077.61	0.413787	1.43e-05	Arl4a	11861	4.84466
ENSMUSG00000070639	4570.89	0.262745	1.44e-05	Lrrc8b	433926	4.84164
ENSMUSG00000025666	1985.7	1.0036	1.45e-05	Tmem47	192216	4.83863
ENSMUSG00000021704	2076.89	0.34816	1.45e-05	Mtx3	382793	4.83863
ENSMUSG00000056073	2355.73	0.320735	1.45e-05	Grik2	14806	4.83863
ENSMUSG00000056124	6135.66	0.31091	1.47e-05	B4galt6	56386	4.83268
ENSMUSG00000024712	2049.6	0.295182	1.48e-05	Rfk	54391	4.82974
ENSMUSG00000020368	16216	0.292692	1.52e-05	Canx	12330	4.81816
ENSMUSG00000019861	2552.09	0.302177	1.53e-05	Gopc	94221	4.81531
ENSMUSG00000000276	2307.98	0.28011	1.56e-05	Dgke	56077	4.80688
ENSMUSG00000024759	1387.77	0.365475	1.58e-05	Atl3	109168	4.80134
ENSMUSG00000067879	4426.26	0.257526	1.58e-05	Vxn	76982	4.80134
ENSMUSG00000052748	264.265	0.619739	1.6e-05	Swt1	66875	4.79588
ENSMUSG00000074165	1205.55	0.405438	1.6e-05	Zfp788	67607	4.79588
ENSMUSG00000029403	3654.72	0.263218	1.62e-05	Cdkl2	53886	4.79048
ENSMUSG00000024597	1214.47	0.399996	1.65e-05	Slc12a2	20496	4.78252
ENSMUSG00000024383	1776.66	0.397361	1.68e-05	Map3k2	26405	4.77469
ENSMUSG00000007850	6089.66	0.337006	1.68e-05	Hnrnph1	59013	4.77469
ENSMUSG00000015189	2017.45	0.326834	1.69e-05	Casd1	213819	4.77211
ENSMUSG00000026034	2631.3	0.364913	1.69e-05	Clk1	12747	4.77211
ENSMUSG00000078307	1510.02	0.361608	1.69e-05	AI593442	330941	4.77211
ENSMUSG00000021549	1945.42	0.349615	1.74e-05	Rasa1	218397	4.75945
ENSMUSG00000057894	1185.01	0.35207	1.75e-05	Zfp329	67230	4.75696
ENSMUSG00000015214	1216.56	0.359277	1.78e-05	Mtmr1	53332	4.74958
ENSMUSG00000043252	1058.74	0.379345	1.78e-05	Tmem64	100201	4.74958
ENSMUSG00000024083	18163.7	0.240592	1.79e-05	Pja2	224938	4.74715
ENSMUSG00000032410	1615.15	0.349303	1.8e-05	Xrn1	24127	4.74473
ENSMUSG00000025321	1217.74	0.496268	1.81e-05	Itgb8	320910	4.74232
ENSMUSG00000048280	382.437	0.586662	1.82e-05	Zfp738	408068	4.73993
ENSMUSG00000020589	14520.2	0.221777	1.85e-05	Fam49a	76820	4.73283
ENSMUSG00000004151	574.533	0.513176	1.89e-05	Etv1	14009	4.72354
ENSMUSG00000028496	1875.89	0.337253	1.9e-05	Mllt3	70122	4.72125
ENSMUSG00000022674	897.766	0.980158	1.9e-05	Ube2v2	70620	4.72125
ENSMUSG00000008333	817.612	0.438709	1.91e-05	Snrpb2	20639	4.71897
ENSMUSG00000014905	678.869	0.541712	1.94e-05	Dnajb9	27362	4.7122
ENSMUSG00000060227	5064.85	0.341133	1.99e-05	Casc4	319996	4.70115
ENSMUSG00000058897	1710.87	0.312048	1.99e-05	Col25a1	77018	4.70115
ENSMUSG00000015342	570.27	0.54946	2.01e-05	Xk	22439	4.6968
ENSMUSG00000057406	5551.65	0.247093	2.01e-05	Nsd2	107823	4.6968
ENSMUSG00000040653	1411.14	0.370601	2.02e-05	Ppp1r14c	76142	4.69465
ENSMUSG00000021377	1083.33	0.41642	2.04e-05	Dek	110052	4.69037
ENSMUSG00000060988	520.788	0.590763	2.07e-05	Galnt13	271786	4.68403
ENSMUSG00000063694	177.842	0.755367	2.1e-05	Cycs	13063	4.67778
ENSMUSG00000010608	4238.01	0.298286	2.11e-05	Rbm25	67039	4.67572
ENSMUSG00000042197	2507.97	0.381209	2.14e-05	Zfp451	98403	4.66959
ENSMUSG00000032407	2695.59	0.334081	2.19e-05	U2surp	67958	4.65956
ENSMUSG00000005034	13218.2	0.291585	2.21e-05	Prkacb	18749	4.65561
ENSMUSG00000027122	1497.98	0.387034	2.23e-05	Arl14ep	212772	4.6517
ENSMUSG00000049606	2364.63	0.329164	2.28e-05	Zfp644	52397	4.64207
ENSMUSG00000059921	2975.93	0.279043	2.29e-05	Unc5c	22253	4.64016
ENSMUSG00000026643	3570.85	0.268589	2.33e-05	Nmt2	18108	4.63264
ENSMUSG00000032621	1768.88	0.314475	2.33e-05	Srek1	218543	4.63264
ENSMUSG00000069769	1768.33	0.406164	2.35e-05	Msi2	76626	4.62893
ENSMUSG00000017548	1039.98	0.380591	2.35e-05	Suz12	52615	4.62893
ENSMUSG00000055531	3829.52	0.720554	2.36e-05	Cpsf6	432508	4.62709
ENSMUSG00000032403	112.869	0.946556	2.37e-05	2300009A05Rik	69478	4.62525
ENSMUSG00000021693	4205.99	0.297784	2.38e-05	Kif2a	16563	4.62342
ENSMUSG00000069670	2318.78	0.301162	2.41e-05	Nkain2	432450	4.61798
ENSMUSG00000032349	3867.56	0.272995	2.42e-05	Elovl5	68801	4.61618
ENSMUSG00000054459	9692.38	0.24379	2.45e-05	Vsnl1	26950	4.61083
ENSMUSG00000022016	13291.6	0.293573	2.47e-05	Akap11	219181	4.6073
ENSMUSG00000028842	1425.5	0.360789	2.48e-05	Ago3	214150	4.60555
ENSMUSG00000036309	9316.57	0.249016	2.48e-05	Skp1a	21402	4.60555
ENSMUSG00000044768	812.804	0.416617	2.49e-05	D1Ertd622e	52392	4.6038
ENSMUSG00000054942	3656.25	0.282806	2.5e-05	Miga1	215708	4.60206
ENSMUSG00000073131	662.207	1.00597	2.58e-05	Vma21	67048	4.58838
ENSMUSG00000093536	474.626	0.506338	2.62e-05	Smim17	100042450	4.5817
ENSMUSG00000022361	2962.68	0.286706	2.65e-05	Zhx1	22770	4.57675
ENSMUSG00000042272	3932.36	0.292295	2.72e-05	Sestd1	228071	4.56543
ENSMUSG00000031673	3311.92	0.307031	2.72e-05	Cdh11	12552	4.56543
ENSMUSG00000008763	3789.17	0.280114	2.74e-05	Man1a2	17156	4.56225
ENSMUSG00000003847	2517.88	0.348655	2.76e-05	Nfat5	54446	4.55909
ENSMUSG00000050714	361.391	0.550744	2.81e-05	Zbtb26	320633	4.55129
ENSMUSG00000052137	296.309	0.667593	2.86e-05	Rbm12b2	77604	4.54363
ENSMUSG00000028228	572.269	0.49527	2.88e-05	Cpne3	70568	4.54061
ENSMUSG00000027620	5924.77	0.287033	2.9e-05	Rbm39	170791	4.5376
ENSMUSG00000020128	971.653	0.42203	2.93e-05	Vps54	245944	4.53313
ENSMUSG00000045205	674.28	0.438124	2.94e-05	Dpy19l4	381510	4.53165
ENSMUSG00000004798	5563.61	0.231463	2.98e-05	Ulk2	29869	4.52578
ENSMUSG00000026158	5360.45	0.627843	3.01e-05	Ogfrl1	70155	4.52143
ENSMUSG00000028212	189.264	0.779191	3.02e-05	Ccne2	12448	4.51999
ENSMUSG00000050697	1054.27	0.356697	3.03e-05	Prkaa1	105787	4.51856
ENSMUSG00000034098	1929.91	0.323086	3.06e-05	Fstl5	213262	4.51428
ENSMUSG00000027900	893.343	0.413887	3.09e-05	Dram2	67171	4.51004
ENSMUSG00000070709	281.66	0.61901	3.13e-05	Zfp974	73430	4.50446
ENSMUSG00000063108	1039.75	0.373121	3.13e-05	Zfp26	22688	4.50446
ENSMUSG00000026872	6117.22	0.353284	3.25e-05	Zeb2	24136	4.48812
ENSMUSG00000028360	2416.83	0.292386	3.27e-05	Slc44a5	242259	4.48545
ENSMUSG00000038679	2236.84	0.350917	3.27e-05	Trps1	83925	4.48545
ENSMUSG00000039770	1540.08	0.312964	3.36e-05	Ypel5	383295	4.47366
ENSMUSG00000039219	2201.85	0.335702	3.39e-05	Arid4b	94246	4.4698
ENSMUSG00000032727	834.57	0.481181	3.49e-05	Mier3	218613	4.45717
ENSMUSG00000026153	1420.21	0.352656	3.5e-05	Fam135a	68187	4.45593
ENSMUSG00000018481	4345.27	0.287661	3.5e-05	Appbp2	66884	4.45593
ENSMUSG00000020390	4159.09	0.327673	3.53e-05	Ube2b	22210	4.45223
ENSMUSG00000021613	2899.09	0.668894	3.53e-05	Hapln1	12950	4.45223
ENSMUSG00000022636	5070.46	0.349471	3.73e-05	Alcam	11658	4.42829
ENSMUSG00000059742	557.544	0.510664	3.77e-05	Kcnh7	170738	4.42366
ENSMUSG00000032375	1334.33	0.320387	3.79e-05	Aph1b	208117	4.42136
ENSMUSG00000041380	1835.76	0.322284	3.8e-05	Htr2c	15560	4.42022
ENSMUSG00000027002	23388.3	0.222027	3.8e-05	Nckap1	50884	4.42022
ENSMUSG00000021711	1614.36	0.321501	3.82e-05	Trappc13	66975	4.41794
ENSMUSG00000029672	1841.99	0.320246	3.83e-05	Fam3c	27999	4.4168
ENSMUSG00000057182	2879.55	0.312059	3.84e-05	Scn3a	20269	4.41567
ENSMUSG00000036779	1317.57	0.331415	3.85e-05	Tent4b	214627	4.41454
ENSMUSG00000022205	6069.91	0.319351	3.85e-05	Sub1	20024	4.41454
ENSMUSG00000068457	542.674	0.529658	3.86e-05	Uty	22290	4.41341
ENSMUSG00000021147	2856.43	0.273711	3.95e-05	Wdr37	207615	4.4034
ENSMUSG00000057113	1733.72	0.322812	3.97e-05	Npm1	18148	4.40121
ENSMUSG00000028399	5810.42	0.28663	4.13e-05	Ptprd	19266	4.38405
ENSMUSG00000014932	399.407	0.591183	4.14e-05	Yes1	22612	4.383
ENSMUSG00000051469	1483.06	0.333917	4.16e-05	Zfp24	59057	4.38091
ENSMUSG00000025665	787.57	0.433717	4.19e-05	Rps6ka6	67071	4.37779
ENSMUSG00000047139	6723.92	0.267539	4.19e-05	Cd24a	12484	4.37779
ENSMUSG00000043019	2399.64	0.274498	4.2e-05	Edem3	66967	4.37675
ENSMUSG00000030788	3475.79	0.296616	4.22e-05	Rnf141	67150	4.37469
ENSMUSG00000048347	455.612	0.567	4.26e-05	Pcdhb18	93889	4.37059
ENSMUSG00000055421	2680.79	0.328621	4.31e-05	Pcdh9	211712	4.36552
ENSMUSG00000050587	1554.36	0.334176	4.37e-05	Lrrc4c	241568	4.35952
ENSMUSG00000028577	2775.94	0.277372	4.42e-05	Plaa	18786	4.35458
ENSMUSG00000056145	1127.11	0.956199	4.45e-05	AI504432	229694	4.35164
ENSMUSG00000040151	3298.17	0.259361	4.45e-05	Hs2st1	23908	4.35164
ENSMUSG00000020385	1630.11	0.372032	4.45e-05	Clk4	12750	4.35164
ENSMUSG00000029290	1132.5	0.449098	4.48e-05	Zfp326	54367	4.34872
ENSMUSG00000024639	10093	0.280446	4.56e-05	Gnaq	14682	4.34104
ENSMUSG00000050967	2364.04	0.277243	4.6e-05	Creg2	263764	4.33724
ENSMUSG00000041763	2948.69	0.307667	4.76e-05	Tpp2	22019	4.32239
ENSMUSG00000020273	815.513	0.39342	4.76e-05	Papolg	216578	4.32239
ENSMUSG00000044150	292.226	0.646945	4.83e-05	Bclaf3	382252	4.31605
ENSMUSG00000032076	13595.8	0.265792	4.83e-05	Cadm1	54725	4.31605
ENSMUSG00000027829	1409.6	0.36142	4.84e-05	Ccnl1	56706	4.31515
ENSMUSG00000052656	1671.99	0.319735	4.87e-05	Rnf103	22644	4.31247
ENSMUSG00000027550	632.304	0.439354	4.97e-05	Lrrcc1	71710	4.30364
ENSMUSG00000037075	1423.49	0.310385	5.02e-05	Rnf139	75841	4.2993
ENSMUSG00000031703	7202.59	0.267782	5.1e-05	Itfg1	71927	4.29243
ENSMUSG00000021427	4816.22	0.26577	5.12e-05	Ssr1	107513	4.29073
ENSMUSG00000034761	1795.82	0.318022	5.13e-05	Map4k5	399510	4.28988
ENSMUSG00000066595	655.608	0.442051	5.3e-05	Flvcr1	226844	4.27572
ENSMUSG00000034551	204.561	0.714849	5.31e-05	Hdx	245596	4.27491
ENSMUSG00000073563	1891.39	0.327037	5.31e-05	Csnk1g3	70425	4.27491
ENSMUSG00000039100	10540	0.211986	5.44e-05	2021-03-06	223455	4.2644
ENSMUSG00000010175	1146.21	0.342339	5.64e-05	Prox1	19130	4.24872
ENSMUSG00000033849	774.074	0.453889	5.69e-05	B3galt2	26878	4.24489
ENSMUSG00000021188	1593.81	0.29337	5.69e-05	Trip11	109181	4.24489
ENSMUSG00000022261	1563.03	0.35731	5.73e-05	Sdc2	15529	4.24185
ENSMUSG00000060373	3587.88	0.24551	5.82e-05	Hnrnpc	15381	4.23508
ENSMUSG00000021709	1893.44	0.347633	5.84e-05	Erbin	59079	4.23359
ENSMUSG00000028243	1889.47	0.33535	5.85e-05	Ubxn2b	68053	4.23284
ENSMUSG00000026594	2938.24	0.278165	5.96e-05	Ralgps2	78255	4.22475
ENSMUSG00000004591	789.223	0.399567	6.02e-05	Pkn2	109333	4.2204
ENSMUSG00000071533	772.312	0.401272	6.13e-05	Pcnp	76302	4.21254
ENSMUSG00000020309	279.026	0.687053	6.15e-05	Chac2	68044	4.21112
ENSMUSG00000062901	2465.17	0.301426	6.16e-05	Klhl24	75785	4.21042
ENSMUSG00000015568	11149.4	0.252944	6.28e-05	Lpl	16956	4.20204
ENSMUSG00000030967	2044.74	0.291308	6.34e-05	Zranb1	360216	4.19791
ENSMUSG00000020053	232.904	0.625951	6.36e-05	Igf1	16000	4.19654
ENSMUSG00000031696	9699.47	0.218322	6.45e-05	Vps35	65114	4.19044
ENSMUSG00000022055	14497.1	0.222086	6.6e-05	Nefl	18039	4.18046
ENSMUSG00000029669	691.8	0.454222	6.6e-05	Tspan12	269831	4.18046
ENSMUSG00000033760	473.401	0.466888	6.85e-05	Rbm4b	66704	4.16431
ENSMUSG00000024811	8496.06	0.243086	6.88e-05	Tnks2	74493	4.16241
ENSMUSG00000027806	1499.07	0.38172	6.99e-05	Tsc22d2	72033	4.15552
ENSMUSG00000032030	2182.41	0.30717	6.99e-05	Cul5	75717	4.15552
ENSMUSG00000020137	402.686	0.537756	7.14e-05	Thap2	66816	4.1463
ENSMUSG00000021189	984.281	0.414913	7.2e-05	Atxn3	110616	4.14267
ENSMUSG00000110444	183.826	0.738357	7.26e-05	Gm10033	378466	4.13906
ENSMUSG00000030760	542.487	0.438427	7.39e-05	Acer3	66190	4.13136
ENSMUSG00000045284	1251.03	0.356227	7.5e-05	Dcaf12l1	245404	4.12494
ENSMUSG00000033900	6241.49	0.250319	7.5e-05	Map9	213582	4.12494
ENSMUSG00000045991	655.792	0.453754	7.5e-05	Onecut2	225631	4.12494
ENSMUSG00000027011	2476.25	0.260014	7.52e-05	Ube2e3	22193	4.12378
ENSMUSG00000052581	198.724	0.701285	7.6e-05	Lrrtm4	243499	4.11919
ENSMUSG00000046873	1588.12	0.354345	7.74e-05	Mbtps2	270669	4.11126
ENSMUSG00000069094	1351.74	0.334538	7.81e-05	Pde7a	18583	4.10735
ENSMUSG00000055447	5853.81	0.282743	7.97e-05	Cd47	16423	4.09854
ENSMUSG00000017776	5565.48	0.232609	8.04e-05	Crk	12928	4.09474
ENSMUSG00000040297	1686.66	0.331555	8.1e-05	Suco	226551	4.09151
ENSMUSG00000028518	1453.69	0.301865	8.19e-05	Prkaa2	108079	4.08672
ENSMUSG00000000838	2257.45	0.747462	8.29e-05	Fmr1	14265	4.08145
ENSMUSG00000063568	2932.36	0.2902	8.29e-05	Jazf1	231986	4.08145
ENSMUSG00000022858	659.539	0.444046	8.34e-05	Tra2b	20462	4.07883
ENSMUSG00000021870	2375.68	0.283479	8.37e-05	Slmap	83997	4.07727
ENSMUSG00000032186	25405.9	0.280754	8.37e-05	Tmod2	50876	4.07727
ENSMUSG00000058835	4061.47	0.30581	8.54e-05	Abi1	11308	4.06854
ENSMUSG00000038602	2313.77	0.267184	8.93e-05	Slc35f1	215085	4.04915
ENSMUSG00000024293	468.509	0.450812	8.93e-05	Esco1	77805	4.04915
ENSMUSG00000028291	1674.34	0.326061	8.94e-05	Akirin2	433693	4.04866
ENSMUSG00000021936	7746.22	0.255971	9.06e-05	Mapk8	26419	4.04287
ENSMUSG00000074909	1716.17	0.274245	9.09e-05	Ranbp6	240614	4.04144
ENSMUSG00000028879	5267.7	0.250396	9.13e-05	Stx12	100226	4.03953
ENSMUSG00000007613	659.446	0.43954	9.32e-05	Tgfbr1	21812	4.03058
ENSMUSG00000032393	6790.1	0.227645	9.38e-05	Dpp8	74388	4.0278
ENSMUSG00000034636	11685.6	0.229177	9.39e-05	Zyg11b	414872	4.02733
ENSMUSG00000036371	6934.12	0.330451	9.39e-05	Serbp1	66870	4.02733
ENSMUSG00000027193	1536.16	0.290579	9.64e-05	Api5	11800	4.01592
ENSMUSG00000000078	1673.12	0.318204	9.65e-05	Klf6	23849	4.01547
ENSMUSG00000054263	924.177	0.40532	9.69e-05	Lifr	16880	4.01368
ENSMUSG00000020102	2861.36	0.67767	9.81e-05	Slc16a7	20503	4.00833
ENSMUSG00000014592	7010.99	0.267746	9.97e-05	Camta1	100072	4.0013
ENSMUSG00000029787	2167.5	0.277954	0.00010057	Avl9	78937	3.99753
ENSMUSG00000041570	8926.2	0.259324	0.000100911	Camsap2	67886	3.99606
ENSMUSG00000079083	409.606	0.528725	0.000103785	Jrkl	77532	3.98387
ENSMUSG00000037652	2923.91	0.293651	0.0001049	Phc3	241915	3.97922
ENSMUSG00000075703	2937.49	0.274811	0.000105473	Selenoi	28042	3.97686
ENSMUSG00000025544	2995.86	0.244201	0.000106313	Tm9sf2	68059	3.97341
ENSMUSG00000027346	3124.25	0.362417	0.000107868	Gpcpd1	74182	3.96711
ENSMUSG00000053199	2096.68	0.287592	0.000107868	Arhgap20	244867	3.96711
ENSMUSG00000026781	1974.83	0.343865	0.000109004	Acbd5	74159	3.96256
ENSMUSG00000036053	2633.04	0.275546	0.000109179	Fmnl2	71409	3.96186
ENSMUSG00000064115	5012.7	0.755583	0.000113327	Cadm2	239857	3.94567
ENSMUSG00000039178	1213.87	0.316856	0.00011405	Tbc1d19	67249	3.9429
ENSMUSG00000027589	1672.37	0.399593	0.000114781	Pcmtd2	245867	3.94013
ENSMUSG00000027520	2912.72	0.349887	0.000115463	Zdbf2	73884	3.93756
ENSMUSG00000024750	2838.06	0.309554	0.000117492	Zfand5	22682	3.92999
ENSMUSG00000049076	2884.48	0.283403	0.000118247	Acap2	78618	3.92721
ENSMUSG00000049929	92.7737	0.95042	0.000119795	Lpar4	78134	3.92156
ENSMUSG00000028565	2910.83	0.308199	0.000122532	Nfia	18027	3.91175
ENSMUSG00000024077	2790.07	0.261475	0.000122626	Strn	268980	3.91142
ENSMUSG00000001017	3113.64	0.270945	0.00012409	Chtop	66511	3.90626
ENSMUSG00000041408	1866.1	0.293997	0.000125402	Wapl	218914	3.9017
ENSMUSG00000020962	743.751	0.370191	0.000126695	Gtf2a1	83602	3.89724
ENSMUSG00000036097	1635.54	0.31093	0.000126695	Slf2	226151	3.89724
ENSMUSG00000032413	1356.4	0.323397	0.000126716	Rasa2	114713	3.89717
ENSMUSG00000036503	2060.5	0.266598	0.000127966	Rnf13	24017	3.89291
ENSMUSG00000025656	10924.8	0.23582	0.000128781	Arhgef9	236915	3.89015
ENSMUSG00000056268	458.643	0.452528	0.000128813	Dennd1b	329260	3.89004
ENSMUSG00000027598	1778.17	0.308251	0.000131065	Itch	16396	3.88251
ENSMUSG00000030795	4232.89	0.272008	0.000131065	Fus	233908	3.88251
ENSMUSG00000029213	1416.27	0.311698	0.000131621	Commd8	27784	3.88067
ENSMUSG00000046876	1930.53	0.395705	0.000131621	Atxn1	20238	3.88067
ENSMUSG00000058446	2611.23	0.330128	0.000135579	Znrf2	387524	3.86781
ENSMUSG00000061080	18711.1	0.267496	0.000135946	Lsamp	268890	3.86663
ENSMUSG00000020664	4105.55	0.255283	0.000136085	Dld	13382	3.86619
ENSMUSG00000031731	4276.92	0.239695	0.000136123	Ap1g1	11765	3.86607
ENSMUSG00000041058	1373.58	0.378103	0.000138289	Wwp1	107568	3.85921
ENSMUSG00000064368	39607.8	0.769378	0.000138289	ND6	17722	3.85921
ENSMUSG00000044934	433.528	0.473664	0.000138843	Zfp367	238673	3.85748
ENSMUSG00000022905	4449.71	0.239878	0.000143245	Kpna1	16646	3.84392
ENSMUSG00000025592	896.789	0.846656	0.000144159	Dach2	93837	3.84116
ENSMUSG00000025423	1571.31	0.297883	0.000144159	Pias2	17344	3.84116
ENSMUSG00000024286	4039.32	0.22486	0.000144933	Ccny	67974	3.83883
ENSMUSG00000054099	265.421	0.630659	0.000148064	Slc25a40	319653	3.82955
ENSMUSG00000046798	589.31	0.43333	0.000150749	Cldn12	64945	3.82175
ENSMUSG00000002222	4324.26	0.258137	0.000152338	Rmnd5a	68477	3.81719
ENSMUSG00000027162	6417.74	0.664815	0.000153476	Lin7c	22343	3.81396
ENSMUSG00000040242	1463.5	0.307628	0.00015539	Fgfr1op2	67529	3.80858
ENSMUSG00000030452	850.231	0.374646	0.000156626	Nipa2	93790	3.80514
ENSMUSG00000067928	510.166	0.44257	0.000158219	Zfp760	240034	3.80074
ENSMUSG00000090935	515.167	0.438898	0.000158845	Synj2bp	24071	3.79903
ENSMUSG00000005610	37105.3	0.185166	0.000159778	Eif4g2	13690	3.79648
ENSMUSG00000053025	21071.8	0.190906	0.000160392	Sv2b	64176	3.79482
ENSMUSG00000022686	510.158	0.493942	0.000160732	B3gnt5	108105	3.7939
ENSMUSG00000038733	5342.26	0.229079	0.000163227	Wdr26	226757	3.78721
ENSMUSG00000025037	1238.67	0.306179	0.000163993	Maoa	17161	3.78517
ENSMUSG00000024472	1772.05	0.268495	0.000167374	Dcp2	70640	3.77631
ENSMUSG00000032336	13829.8	0.243034	0.000167511	Nptn	20320	3.77596
ENSMUSG00000017707	7943.98	0.209533	0.000167511	Serinc3	26943	3.77596
ENSMUSG00000022255	2990.64	0.265325	0.000167511	Mtdh	67154	3.77596
ENSMUSG00000032525	5555.08	0.257263	0.000171131	Nktr	18087	3.76667
ENSMUSG00000025937	430.646	0.477995	0.000173181	Lactb2	212442	3.7615
ENSMUSG00000043207	1063.89	0.327529	0.000173526	Zmpste24	230709	3.76064
ENSMUSG00000015932	7022.26	0.234399	0.000174547	Dstn	56431	3.75809
ENSMUSG00000042348	1312.47	0.300374	0.000174791	Arl15	218639	3.75748
ENSMUSG00000039166	501.911	0.445558	0.000175275	Akap7	432442	3.75628
ENSMUSG00000078546	92.7598	0.922059	0.000175275	Zfp995	70081	3.75628
ENSMUSG00000036257	3490.45	0.279725	0.000177524	Pnpla8	67452	3.75074
ENSMUSG00000022974	1911.79	0.275926	0.00018123	Paxbp1	67367	3.74177
ENSMUSG00000005506	7634.59	0.228526	0.000181301	Celf1	13046	3.7416
ENSMUSG00000042050	363.556	0.473154	0.00018178	Wdr60	217935	3.74045
ENSMUSG00000027746	1987.78	0.287371	0.000183178	Ufm1	67890	3.73713
ENSMUSG00000027506	1054.58	0.333198	0.000184043	Tpd52	21985	3.73508
ENSMUSG00000026502	1437.58	0.28017	0.000185811	Desi2	78825	3.73093
ENSMUSG00000041633	366.7	0.490367	0.000187119	Kctd12b	207474	3.72788
ENSMUSG00000037119	2544.11	0.248287	0.000188697	Fam91a1	210998	3.72424
ENSMUSG00000041245	1558.87	0.294211	0.000189419	Wnk3	279561	3.72258
ENSMUSG00000054408	1368.53	0.318644	0.000191974	Spcs3	76687	3.71676
ENSMUSG00000021775	572.666	0.428088	0.000192306	Nr1d2	353187	3.71601
ENSMUSG00000027201	1505.05	0.318218	0.000194726	Myef2	17876	3.71058
ENSMUSG00000044147	1400.44	0.285217	0.000195181	Arf6	11845	3.70956
ENSMUSG00000029267	736.113	0.480865	0.000196331	Mtf2	17765	3.70701
ENSMUSG00000022342	874.27	0.354721	0.000200017	Kcnv1	67498	3.69893
ENSMUSG00000094936	143.799	0.739959	0.000200378	Rbm4	19653	3.69815
ENSMUSG00000031701	5236.24	0.222044	0.00020133	Dnaja2	56445	3.69609
ENSMUSG00000042104	1037.82	0.376336	0.00020133	Uggt2	66435	3.69609
ENSMUSG00000024298	2445.23	0.294247	0.000204069	Zfp871	208292	3.69022
ENSMUSG00000031626	4798.14	0.22099	0.000204235	Sorbs2	234214	3.68987
ENSMUSG00000035762	601.218	0.419279	0.000204821	Tmem161b	72745	3.68863
ENSMUSG00000028035	1645.37	0.288206	0.000207575	Dnajb4	67035	3.68282
ENSMUSG00000035992	1618.12	0.344731	0.000208365	Fnip1	216742	3.68118
ENSMUSG00000055296	2542.61	0.263627	0.000208623	Tmem245	242474	3.68064
ENSMUSG00000044098	785.849	0.354565	0.000209362	Rsbn1	229675	3.6791
ENSMUSG00000044408	853.544	0.411757	0.000211383	Sptssa	104725	3.67493
ENSMUSG00000030265	3066.46	0.630597	0.000212494	Kras	16653	3.67265
ENSMUSG00000032018	3285.49	0.242844	0.000212494	Sc5d	235293	3.67265
ENSMUSG00000068479	543.502	0.404386	0.000213819	Mfap1a	67532	3.66995
ENSMUSG00000026585	10988.4	0.206518	0.000215492	Kifap3	16579	3.66657
ENSMUSG00000030232	1189.46	0.334987	0.000219127	Aebp2	11569	3.6593
ENSMUSG00000019998	4946.62	0.289707	0.000219127	Stx7	53331	3.6593
ENSMUSG00000005871	42402.9	0.265031	0.000219127	Apc	11789	3.6593
ENSMUSG00000047786	1839.5	0.303991	0.000221036	Lix1	66643	3.65554
ENSMUSG00000060475	768.439	0.372719	0.000222532	Wtap	60532	3.65261
ENSMUSG00000038212	1129.33	0.37472	0.000225149	Mfsd14b	66631	3.64753
ENSMUSG00000040818	846.55	0.360055	0.000225351	Dennd6a	211922	3.64714
ENSMUSG00000040396	1645.79	0.278176	0.000225395	Abhd13	68904	3.64706
ENSMUSG00000024614	1764.68	0.677921	0.000226811	Tmx3	67988	3.64434
ENSMUSG00000013662	5340.19	0.246912	0.000227594	Atad1	67979	3.64284
ENSMUSG00000097061	565.133	0.414281	0.000228245	9330151L19Rik	414085	3.6416
ENSMUSG00000036916	790.405	0.379446	0.000230224	Zfp280c	208968	3.63785
ENSMUSG00000001986	2503.84	0.251058	0.000234235	Gria3	53623	3.63035
ENSMUSG00000032238	618.574	0.406003	0.000234734	Rora	19883	3.62942
ENSMUSG00000040865	1462.56	0.296544	0.000238208	Ino80d	227195	3.62304
ENSMUSG00000015749	4860	0.249878	0.00024306	Anp32e	66471	3.61429
ENSMUSG00000033623	2922.49	0.292232	0.000244586	Pcgf3	69587	3.61157
ENSMUSG00000035840	368.565	0.519924	0.000244586	Lysmd3	80289	3.61157
ENSMUSG00000033883	1318.47	0.312255	0.000248879	Zfp267	241944	3.60401
ENSMUSG00000024146	1146.47	0.30955	0.000252232	Cript	56724	3.5982
ENSMUSG00000010290	1280.56	0.297625	0.000253036	AI597479	98404	3.59682
ENSMUSG00000027184	12672.4	0.257292	0.000255039	Caprin1	53872	3.59339
ENSMUSG00000025903	465.908	1.50747	0.000257169	Lypla1	18777	3.58978
ENSMUSG00000034647	3317.99	0.35669	0.00026086	Ankrd12	106585	3.58359
ENSMUSG00000002996	1302.15	0.311381	0.000261675	Hbp1	73389	3.58224
ENSMUSG00000021282	5408.82	0.211766	0.000263268	Eif5	217869	3.5796
ENSMUSG00000005656	1512.01	0.289845	0.000266113	Snx6	72183	3.57493
ENSMUSG00000029405	4339.63	0.238297	0.000269401	G3bp2	23881	3.5696
ENSMUSG00000022119	2169.76	0.311044	0.000272652	Rbm26	74213	3.56439
ENSMUSG00000048249	387.852	0.463307	0.000273915	Crebrf	77128	3.56238
ENSMUSG00000041762	1266.73	0.327637	0.000275858	Gpr155	68526	3.55931
ENSMUSG00000052299	2883.7	0.246297	0.000278229	Ltn1	78913	3.5556
ENSMUSG00000009207	1472.39	0.789092	0.000279735	Lnpk	69605	3.55325
ENSMUSG00000025630	3643.97	0.243932	0.000281258	Hprt	15452	3.5509
ENSMUSG00000027852	3948.67	0.239081	0.000282305	Nras	18176	3.54928
ENSMUSG00000021548	1403.32	0.290473	0.000283753	Ccnh	66671	3.54706
ENSMUSG00000021112	1043.27	0.348228	0.00028768	Mpp5	56217	3.54109
ENSMUSG00000000568	4973.24	0.263207	0.00029703	Hnrnpd	11991	3.5272
ENSMUSG00000028256	302.1	0.503545	0.000298144	Odf2l	52184	3.52557
ENSMUSG00000021500	2818	0.230729	0.000299125	Ddx46	212880	3.52415
ENSMUSG00000022206	1466.88	0.338417	0.00030478	Npr3	18162	3.51601
ENSMUSG00000027347	2859.71	0.262967	0.00030979	Rasgrp1	19419	3.50893
ENSMUSG00000036112	2173.15	0.249782	0.000311212	Metap2	56307	3.50694
ENSMUSG00000043991	1293.89	0.377212	0.000314981	Pura	19290	3.50172
ENSMUSG00000025757	4576.09	0.275338	0.000319303	Hspa4l	18415	3.4958
ENSMUSG00000019802	2018.51	0.267085	0.000319303	Sec63	140740	3.4958
ENSMUSG00000039789	614.791	0.397346	0.000319303	Zfp597	71063	3.4958
ENSMUSG00000048279	4383.97	0.289973	0.000320049	Sacs	50720	3.49478
ENSMUSG00000000355	1312.79	0.291637	0.000320298	Mcts1	68995	3.49445
ENSMUSG00000060002	880.997	0.821077	0.00032741	Chpt1	212862	3.48491
ENSMUSG00000028165	1086.05	0.323662	0.000329402	Cisd2	67006	3.48227
ENSMUSG00000067242	2772.66	0.250036	0.00033103	Lgi1	56839	3.48013
ENSMUSG00000028221	1353.7	0.385257	0.000331039	Pip4p2	72519	3.48012
ENSMUSG00000022141	2146.55	0.288873	0.000331669	Nipbl	71175	3.4793
ENSMUSG00000031302	1977.4	0.27827	0.000333205	Nlgn3	245537	3.47729
ENSMUSG00000041817	2251.27	0.375316	0.000333409	Fam169a	320557	3.47702
ENSMUSG00000020063	374.979	0.447837	0.000334073	Sirt1	93759	3.47616
ENSMUSG00000027130	1602.74	0.275821	0.000337261	Slc12a6	107723	3.47203
ENSMUSG00000052372	317.342	0.631037	0.000342117	Il1rapl1	331461	3.46583
ENSMUSG00000060882	2482.15	0.31212	0.000342117	Kcnd2	16508	3.46583
ENSMUSG00000026986	651.842	0.397821	0.000342399	Hnmt	140483	3.46547
ENSMUSG00000026484	1421.35	0.381883	0.000343286	Rnf2	19821	3.46434
ENSMUSG00000026767	2186.57	0.304343	0.000346966	Mindy3	66960	3.45971
ENSMUSG00000017421	4636.98	0.232509	0.000347057	Zfp207	22680	3.4596
ENSMUSG00000027035	4769.23	0.232057	0.000348201	Cers6	241447	3.45817
ENSMUSG00000035623	2641.24	0.289241	0.000348895	Rsf1	233532	3.45731
ENSMUSG00000036298	1695.85	0.305789	0.00035309	Slc2a13	239606	3.45211
ENSMUSG00000041483	1312.82	0.319936	0.000354902	Zfp281	226442	3.44989
ENSMUSG00000046523	1335.32	0.338899	0.000355278	Kctd4	67516	3.44943
ENSMUSG00000040265	4303.26	0.258945	0.000357553	Dnm3	103967	3.44666
ENSMUSG00000024411	4079.17	0.244151	0.00035913	Aqp4	11829	3.44475
ENSMUSG00000025982	11508.4	0.216402	0.00035979	Sf3b1	81898	3.44395
ENSMUSG00000062098	2811.46	0.2338	0.00036051	Btbd3	228662	3.44308
ENSMUSG00000040649	3769.47	0.314121	0.000367315	Rimklb	108653	3.43496
ENSMUSG00000025893	272.907	0.524062	0.000369167	Kbtbd3	69149	3.43278
ENSMUSG00000001260	398.857	0.458643	0.000372371	Gabrg1	14405	3.42902
ENSMUSG00000004698	2677.17	0.255943	0.00037447	Hdac9	79221	3.42658
ENSMUSG00000019943	22035.1	0.230496	0.00038233	Atp2b1	67972	3.41756
ENSMUSG00000029328	4435.13	0.261205	0.00038604	Hnrnpdl	50926	3.41337
ENSMUSG00000043391	3038.33	0.230337	0.00038604	2510009E07Rik	72190	3.41337
ENSMUSG00000046230	1374.58	0.371921	0.00038604	Vps13a	271564	3.41337
ENSMUSG00000001998	604.499	0.371198	0.000387161	Ap4e1	108011	3.41211
ENSMUSG00000032757	565.982	0.416333	0.000387161	Bet1	12068	3.41211
ENSMUSG00000022122	3050.22	0.250938	0.000387161	Ednrb	13618	3.41211
ENSMUSG00000038172	1186.55	0.285142	0.000389693	Ttc39b	69863	3.40928
ENSMUSG00000055480	250.492	0.558851	0.000389693	Zfp458	238690	3.40928
ENSMUSG00000063406	587.387	0.919567	0.000391165	Tmed5	73130	3.40764
ENSMUSG00000057363	741.439	0.336557	0.000391752	Uxs1	67883	3.40699
ENSMUSG00000024234	671.387	0.400161	0.000392196	Mtpap	67440	3.4065
ENSMUSG00000037996	9574.83	0.227833	0.000392222	Slc24a2	76376	3.40647
ENSMUSG00000042155	3971.44	0.214433	0.000395676	Klhl23	277396	3.40266
ENSMUSG00000020859	12578.3	0.216323	0.00039732	Spag9	70834	3.40086
ENSMUSG00000050079	1124.22	0.309939	0.000399242	Rspry1	67610	3.39876
ENSMUSG00000056870	107.333	0.951247	0.000403031	Gulp1	70676	3.39466
ENSMUSG00000021379	400.233	0.471543	0.000405455	Id4	15904	3.39206
ENSMUSG00000042590	3383.54	0.239352	0.000406432	Ipo11	76582	3.39101
ENSMUSG00000043313	449.829	0.415648	0.000410368	Pcdhb19	93890	3.38683
ENSMUSG00000031232	918.644	0.320256	0.000418657	Magt1	67075	3.37814
ENSMUSG00000031290	1203.64	0.763276	0.000419461	Lrch2	210297	3.37731
ENSMUSG00000056812	6080.03	0.234579	0.00041984	St8sia3	20451	3.37692
ENSMUSG00000008226	593.195	0.36492	0.000420103	Scrn3	74616	3.37664
ENSMUSG00000009030	944.131	0.330849	0.000425589	Pdcl	67466	3.37101
ENSMUSG00000035476	772.228	0.37037	0.000426408	Tab3	66724	3.37017
ENSMUSG00000051185	1247.13	0.386413	0.000433118	Fam174a	67698	3.36339
ENSMUSG00000018068	1158.83	0.291241	0.000437783	Ints2	70422	3.35874
ENSMUSG00000052726	338.776	0.55526	0.000437877	Kcnt2	240776	3.35865
ENSMUSG00000009628	243.235	0.581994	0.000439355	Tex15	104271	3.35718
ENSMUSG00000039753	1779.51	0.316401	0.000443486	Fbxl5	242960	3.35312
ENSMUSG00000019256	839.571	0.35316	0.000443991	Ahr	11622	3.35263
ENSMUSG00000028780	649.008	0.377211	0.000445435	Sema3c	20348	3.35122
ENSMUSG00000029655	1537.36	0.317307	0.000447615	N4bp2l2	381695	3.3491
ENSMUSG00000066613	206.569	0.5835	0.000453732	Zfp932	69504	3.3432
ENSMUSG00000062929	3381.86	0.558676	0.000456913	Cfl2	12632	3.34017
ENSMUSG00000042042	435.05	0.420271	0.000458847	Csgalnact2	78752	3.33833
ENSMUSG00000049421	1879.56	0.25188	0.000459741	Zfp260	26466	3.33749
ENSMUSG00000021268	87314.1	0.236959	0.000460419	Meg3	17263	3.33685
ENSMUSG00000025949	1962.43	0.275544	0.000462576	Pikfyve	18711	3.33482
ENSMUSG00000015222	62158.6	0.223572	0.000463694	Map2	17756	3.33377
ENSMUSG00000049176	4291.33	0.213758	0.000463694	Frmpd4	333605	3.33377
ENSMUSG00000037395	740.93	0.364558	0.000464344	Rcor3	214742	3.33316
ENSMUSG00000033904	1057.37	0.303675	0.000465227	Ccp110	101565	3.33234
ENSMUSG00000005087	879.384	0.348448	0.000468537	Cd44	12505	3.32926
ENSMUSG00000033799	1596.2	0.291225	0.000470347	Tasor2	105203	3.32758
ENSMUSG00000034653	1029.91	0.342069	0.000470347	Ythdc2	240255	3.32758
ENSMUSG00000068798	818.487	0.345926	0.000476736	Rap1a	109905	3.32172
ENSMUSG00000039585	5762.37	0.266213	0.000485911	Myo9a	270163	3.31344
ENSMUSG00000023883	2353.03	0.263661	0.000488651	Phf10	72057	3.311
ENSMUSG00000061136	2117.93	0.336594	0.000492351	Prpf40a	56194	3.30773
ENSMUSG00000031198	994.644	0.347666	0.000497481	Fundc2	67391	3.30322
ENSMUSG00000021832	2980.25	0.251753	0.00049896	Psmc6	67089	3.30193
ENSMUSG00000020311	1483.35	0.284117	0.0005044	Erlec1	66753	3.29722
ENSMUSG00000087141	2020.74	0.273075	0.000515009	Plcxd2	433022	3.28819
ENSMUSG00000066324	5096.73	0.666711	0.000522571	Impad1	242291	3.28185
ENSMUSG00000027881	1666.95	0.297632	0.000523647	Prpf38b	66921	3.28096
ENSMUSG00000024095	2283.43	0.251293	0.000525968	Hnrnpll	72692	3.27904
ENSMUSG00000063531	2015.54	0.291673	0.000526869	Sema3e	20349	3.2783
ENSMUSG00000024231	2526.18	0.247527	0.000526869	Cul2	71745	3.2783
ENSMUSG00000028060	1849.06	0.24667	0.000536411	Khdc4	74200	3.2705
ENSMUSG00000021745	6102.8	0.21413	0.000540553	Ptprg	19270	3.26716
ENSMUSG00000018846	5349.11	0.556913	0.000542256	Pank3	211347	3.2658
ENSMUSG00000032050	3147.54	0.281315	0.000546983	Rdx	19684	3.26203
ENSMUSG00000000266	988.289	0.32044	0.000557125	Mid2	23947	3.25405
ENSMUSG00000040928	1371.33	0.277039	0.000564599	S100pbp	74648	3.24826
ENSMUSG00000095432	347.638	0.467374	0.000567421	Zfp748	212276	3.24609
ENSMUSG00000025931	4814.33	0.194539	0.000569072	Paqr8	74229	3.24483
ENSMUSG00000038121	1559.51	0.264882	0.000572135	Fam210a	108654	3.2425
ENSMUSG00000021824	1204.62	0.280139	0.000573889	Ap3m1	55946	3.24117
ENSMUSG00000062797	639.712	0.396959	0.00057454	Hikeshi	67669	3.24068
ENSMUSG00000024943	1099.12	0.325736	0.000575595	Smc5	226026	3.23988
ENSMUSG00000033487	2814.94	0.260296	0.000576156	Fndc3a	319448	3.23946
ENSMUSG00000022664	1213.71	0.303966	0.00057728	Slc35a5	74102	3.23861
ENSMUSG00000056216	1219.06	0.299172	0.000579724	Cebpg	12611	3.23678
ENSMUSG00000059839	378.319	0.433035	0.000579724	Zfp874b	408067	3.23678
ENSMUSG00000063317	3021.6	0.238187	0.000580363	Usp31	76179	3.2363
ENSMUSG00000028098	1435.76	0.269194	0.000580651	Rnf115	67845	3.23608
ENSMUSG00000054414	841.942	0.344329	0.000581212	Slc30a7	66500	3.23567
ENSMUSG00000031010	10799.4	0.217557	0.000581461	Usp9x	22284	3.23548
ENSMUSG00000025103	1757.82	0.291299	0.000584472	Btbd1	83962	3.23324
ENSMUSG00000020015	3316.91	0.2323	0.000584472	Cdk17	237459	3.23324
ENSMUSG00000020650	539.239	0.432227	0.000587515	Bcap29	12033	3.23098
ENSMUSG00000033186	1173.75	0.770698	0.000593768	Mzt1	76789	3.22638
ENSMUSG00000020521	534.887	0.391174	0.000595011	Rnft1	76892	3.22548
ENSMUSG00000058571	495.557	0.395199	0.0005973	Gpc6	23888	3.22381
ENSMUSG00000008658	4138.36	0.289322	0.000600648	Rbfox1	268859	3.22138
ENSMUSG00000031644	1594.51	0.306364	0.000604049	Nek1	18004	3.21893
ENSMUSG00000028483	948.903	0.315658	0.000607031	Snapc3	77634	3.21679
ENSMUSG00000023150	3969.08	0.224356	0.000608196	Ivns1abp	117198	3.21596
ENSMUSG00000018196	1995.77	0.249456	0.000608312	Glrx2	69367	3.21587
ENSMUSG00000063626	2670.53	0.278735	0.000617425	Unc5d	210801	3.20942
ENSMUSG00000029422	2497.1	0.261471	0.000620404	Rsrc2	208606	3.20733
ENSMUSG00000029878	874.754	0.337547	0.000624913	Dbpht2	386753	3.20418
ENSMUSG00000024261	6643.73	0.54119	0.000624913	Syt4	20983	3.20418
ENSMUSG00000036810	832.793	0.345599	0.000630769	Cnep1r1	382030	3.20013
ENSMUSG00000028274	976.298	0.348557	0.000638982	Rngtt	24018	3.19451
ENSMUSG00000034252	2342.39	0.244744	0.00064009	Senp6	215351	3.19376
ENSMUSG00000026834	256.044	0.585851	0.000641241	Acvr1c	269275	3.19298
ENSMUSG00000020634	919.674	0.310939	0.000643506	Ubxn2a	217379	3.19145
ENSMUSG00000051890	493.411	0.39654	0.000651765	Klhdc1	271005	3.18591
ENSMUSG00000022321	1751.12	0.244246	0.000655858	Cdh10	320873	3.18319
ENSMUSG00000035649	1941.98	0.296374	0.000670218	Zcchc7	319885	3.17378
ENSMUSG00000054679	1027.74	0.342177	0.000673988	Srsf12	272009	3.17135
ENSMUSG00000031591	1703.74	0.261071	0.00068084	Asah1	11886	3.16695
ENSMUSG00000059146	13200.3	0.197578	0.000685805	Ntrk3	18213	3.1638
ENSMUSG00000020458	25838.6	0.197876	0.000690706	Rtn4	68585	3.16071
ENSMUSG00000057329	425.272	0.441652	0.000693161	Bcl2	12043	3.15917
ENSMUSG00000068205	2193.29	0.256557	0.000693161	Macrod2	72899	3.15917
ENSMUSG00000025892	1959.59	0.275796	0.000699578	Gria4	14802	3.15516
ENSMUSG00000006818	5462.62	0.204089	0.000705881	Sod2	20656	3.15127
ENSMUSG00000062078	8481.95	0.650002	0.000715673	Qk	19317	3.14529
ENSMUSG00000066456	1409.28	0.279894	0.000719721	Hmgn3	94353	3.14284
ENSMUSG00000028030	1243.8	0.286452	0.000728793	Tbck	271981	3.1374
ENSMUSG00000046311	1089.02	0.33151	0.000728793	Zfp62	22720	3.1374
ENSMUSG00000027438	19667.6	0.190199	0.000731243	Napb	17957	3.13594
ENSMUSG00000007653	3694.76	0.230726	0.000735268	Gabrb2	14401	3.13355
ENSMUSG00000036885	1744.83	0.242933	0.000742478	Arhgef26	622434	3.12932
ENSMUSG00000036087	1002.05	0.349056	0.000748123	Slain2	75991	3.12603
ENSMUSG00000050890	849.55	0.334776	0.000757283	Pdik1l	230809	3.12074
ENSMUSG00000039485	9153.54	0.191756	0.000757283	Tspyl4	72480	3.12074
ENSMUSG00000022299	340.145	0.472305	0.000757283	Slc25a32	69906	3.12074
ENSMUSG00000037984	12124.9	0.229035	0.000762183	Neurod6	11922	3.11794
ENSMUSG00000047146	1924.9	0.290425	0.000766887	Tet1	52463	3.11527
ENSMUSG00000022231	1248.84	0.277309	0.000770745	Sema5a	20356	3.11309
ENSMUSG00000047213	2731.21	0.595496	0.000772231	Ythdf3	229096	3.11225
ENSMUSG00000000561	1386.42	0.259497	0.000772231	Wdr77	70465	3.11225
ENSMUSG00000034342	3897.78	0.200683	0.000773265	Cbl	12402	3.11167
ENSMUSG00000036438	16520.6	0.204585	0.000788317	Calm2	12314	3.1033
ENSMUSG00000022708	31325.1	0.28951	0.000793269	Zbtb20	56490	3.10058
ENSMUSG00000034560	1648.5	0.256937	0.000794761	Washc4	319277	3.09976
ENSMUSG00000021109	2656.67	0.301678	0.000799236	Hif1a	15251	3.09732
ENSMUSG00000037818	556.976	0.380898	0.000802878	Abhd18	269423	3.09535
ENSMUSG00000037795	826.512	0.333538	0.000802878	N4bp2	333789	3.09535
ENSMUSG00000052572	17577.9	0.187524	0.000802878	Dlg2	23859	3.09535
ENSMUSG00000038344	570.671	0.390155	0.000813049	Txlng	353170	3.08988
ENSMUSG00000032913	1272.73	0.281685	0.000822245	Lrig2	269473	3.085
ENSMUSG00000047648	426.002	0.458946	0.000822245	Fbxo30	71865	3.085
ENSMUSG00000022228	935.238	0.298301	0.000830725	Zscan26	432731	3.08054
ENSMUSG00000060301	1160.41	0.293845	0.000836236	2610008E11Rik	72128	3.07767
ENSMUSG00000039419	4663.62	0.218216	0.00083933	Cntnap2	66797	3.07607
ENSMUSG00000054752	2279.33	0.609542	0.000840158	Fsd1l	319636	3.07564
ENSMUSG00000029167	1544.21	0.305686	0.000844368	Ppargc1a	19017	3.07347
ENSMUSG00000042410	2386.7	0.276447	0.000844965	Agps	228061	3.07316
ENSMUSG00000026219	7705.37	0.195712	0.000852575	Trip12	14897	3.06927
ENSMUSG00000038187	1812.93	0.248612	0.000861629	Btbd10	68815	3.06468
ENSMUSG00000053062	2345.45	0.23277	0.000872154	Jam2	67374	3.05941
ENSMUSG00000038084	6414.75	0.203375	0.000873708	Opa1	74143	3.05863
ENSMUSG00000074748	9468.2	0.212447	0.000876813	Atxn7l3b	382423	3.05709
ENSMUSG00000078435	261.528	0.513394	0.000885543	AU041133	216177	3.05279
ENSMUSG00000033411	968.546	0.388329	0.000886983	Ctdspl2	329506	3.05208
ENSMUSG00000035851	1634.57	0.269123	0.00089416	Ythdc1	231386	3.04858
ENSMUSG00000026889	1533.64	0.273719	0.000896246	Rbm18	67889	3.04757
ENSMUSG00000036977	381.472	0.429034	0.000896246	Anapc10	68999	3.04757
ENSMUSG00000052917	1215.03	0.327209	0.000897673	Senp7	66315	3.04688
ENSMUSG00000035093	3479.08	0.233653	0.000899226	Secisbp2l	70354	3.04613
ENSMUSG00000028033	6478.44	0.200533	0.000902503	Kcnq5	226922	3.04455
ENSMUSG00000061778	893.291	0.328545	0.000902503	Mospd2	76763	3.04455
ENSMUSG00000034610	1103.52	0.284599	0.000919465	Tut4	230594	3.03646
ENSMUSG00000029276	285.05	0.493776	0.000926404	Glmn	170823	3.0332
ENSMUSG00000024378	6155.39	0.243085	0.000928261	Stard4	170459	3.03233
ENSMUSG00000006586	1768.47	0.30998	0.000930519	Runx1t1	12395	3.03127
ENSMUSG00000063047	420.629	0.396166	0.000932291	Zfp780b	338354	3.03045
ENSMUSG00000027787	991.194	0.288863	0.000934103	Nmd3	97112	3.02961
ENSMUSG00000020122	2370.56	0.278	0.000940178	Egfr	13649	3.02679
ENSMUSG00000000197	4647.39	0.199089	0.000940785	Nalcn	338370	3.02651
ENSMUSG00000022679	3179.6	0.314344	0.000941872	Mpv17l	93734	3.02601
ENSMUSG00000040850	2408.61	0.226799	0.000944179	Psme4	103554	3.02495
ENSMUSG00000014907	351.894	0.424883	0.000946524	Naf1	234344	3.02387
ENSMUSG00000035864	28914.1	0.19657	0.000958928	Syt1	20979	3.01821
ENSMUSG00000031870	708.167	0.361929	0.000969549	Pgr	18667	3.01343
ENSMUSG00000064367	108093	0.572942	0.000969854	ND5	17721	3.01329
ENSMUSG00000035847	16929.6	0.498225	0.000976678	Ids	15931	3.01025
ENSMUSG00000051951	4989.14	0.247008	0.000981192	Xkr4	497097	3.00825
ENSMUSG00000046985	1579.08	0.246428	0.000995144	Tapt1	231225	3.00211
ENSMUSG00000074994	1052.51	0.305225	0.000997566	Qser1	99003	3.00106
ENSMUSG00000028524	5541.82	0.224996	0.00100093	Sgip1	73094	2.9996
ENSMUSG00000002428	499.884	0.4085	0.00100175	Hltf	20585	2.99924
ENSMUSG00000093930	65224.6	0.226572	0.00101233	Hmgcs1	208715	2.99468
ENSMUSG00000025059	937.525	0.321453	0.00101512	Gk	14933	2.99348
ENSMUSG00000039967	2522.43	0.258364	0.00102019	Zfp292	30046	2.99132
ENSMUSG00000040640	8144.91	0.210282	0.00102019	Erc2	238988	2.99132
ENSMUSG00000035725	612.055	0.365576	0.00102099	Prkx	19108	2.99098
ENSMUSG00000036167	947.106	0.349759	0.00103409	Pphln1	223828	2.98544
ENSMUSG00000100826	2630.92	1.12744	0.00103626	Ipw	16353	2.98453
ENSMUSG00000110185	646.751	0.820662	0.00103626	Igip	109169	2.98453
ENSMUSG00000033931	708.36	0.33688	0.00104718	Rbm34	52202	2.97998
ENSMUSG00000022253	1177.38	0.282263	0.00105017	Nadk2	68646	2.97874
ENSMUSG00000036676	320.999	0.474485	0.00106037	Tmtc3	237500	2.97454
ENSMUSG00000006373	11642.5	0.208975	0.00106213	Pgrmc1	53328	2.97382
ENSMUSG00000101970	241.71	0.524689	0.0010793	1810026B05Rik	69170	2.96686
ENSMUSG00000032925	2559.78	0.283716	0.00108189	Itgbl1	223272	2.96582
ENSMUSG00000024431	1357.89	0.283778	0.00108959	Nr3c1	14815	2.96274
ENSMUSG00000074024	98.6173	0.809176	0.00109134	4632427E13Rik	666737	2.96204
ENSMUSG00000041268	14160.6	0.196389	0.00110247	Dmxl2	235380	2.95763
ENSMUSG00000024758	43876.1	0.174899	0.00110345	Rtn3	20168	2.95725
ENSMUSG00000026393	881.912	0.325808	0.0011081	Nek7	59125	2.95542
ENSMUSG00000022462	2126.39	0.280127	0.0011081	Slc38a2	67760	2.95542
ENSMUSG00000027479	8270.25	0.195929	0.00113702	Mapre1	13589	2.94423
ENSMUSG00000039879	802.643	0.313185	0.00119555	Heca	380629	2.92243
ENSMUSG00000034488	4246.89	0.549547	0.00120482	Edil3	13612	2.91908
ENSMUSG00000038039	2365.61	0.288936	0.00120811	Gcc2	70297	2.91789
ENSMUSG00000028124	1277.49	0.343071	0.00121676	Gclm	14630	2.91479
ENSMUSG00000059173	9789.24	0.196918	0.00122777	Pde1a	18573	2.91088
ENSMUSG00000040782	396.203	0.414192	0.00125397	Cop1	26374	2.90171
ENSMUSG00000039456	1218.1	0.273209	0.00125429	Morc3	338467	2.9016
ENSMUSG00000042834	13580.2	0.221869	0.00126577	Nrep	27528	2.89765
ENSMUSG00000035798	2884.84	0.264984	0.00127902	Zdhhc17	320150	2.89312
ENSMUSG00000020078	1658.69	0.247202	0.00128049	Vps26a	30930	2.89262
ENSMUSG00000045106	312.128	0.44985	0.00128158	Ccdc73	211936	2.89225
ENSMUSG00000026787	3623.25	0.220563	0.00129893	Gad2	14417	2.88641
ENSMUSG00000075376	2518.34	0.657312	0.00131229	Rc3h2	319817	2.88197
ENSMUSG00000022201	12400.9	0.242379	0.00131575	Zfr	22763	2.88083
ENSMUSG00000087694	178.416	0.603693	0.00131603	A530058N18Rik	320846	2.88073
ENSMUSG00000069206	190.182	0.575772	0.00132651	Zfp874a	238692	2.87729
ENSMUSG00000039239	901.641	0.293625	0.00133176	Tgfb2	21808	2.87557
ENSMUSG00000034998	358.115	0.441591	0.00133176	Foxn2	14236	2.87557
ENSMUSG00000058291	1042.02	0.278659	0.00133425	Zfp68	24135	2.87476
ENSMUSG00000054720	956.283	0.277459	0.00134376	Lrrc8c	100604	2.87168
ENSMUSG00000023074	229.124	0.511437	0.00136308	Mospd1	70380	2.86548
ENSMUSG00000040268	2105.49	0.243988	0.00137419	Plekha1	101476	2.86195
ENSMUSG00000029920	1443.57	0.278232	0.00137426	Smarcad1	13990	2.86193
ENSMUSG00000029156	2432.28	0.235531	0.00137526	Sgcb	24051	2.86161
ENSMUSG00000034593	17887.8	0.19248	0.0013753	Myo5a	17918	2.8616
ENSMUSG00000059811	1841.42	0.256236	0.00138611	Atl2	56298	2.8582
ENSMUSG00000018548	9615.04	0.196955	0.00138853	Trim37	68729	2.85744
ENSMUSG00000035958	532.852	0.360187	0.00139463	Tdp2	56196	2.85554
ENSMUSG00000029265	2236.29	0.610696	0.00139571	Dr1	13486	2.85521
ENSMUSG00000057181	3081.04	0.20126	0.00139724	5730455P16Rik	70591	2.85473
ENSMUSG00000027427	779.012	0.303205	0.00140471	Polr3f	70408	2.85241
ENSMUSG00000041649	503.359	0.405307	0.0014062	Klf8	245671	2.85195
ENSMUSG00000030551	722.776	0.349936	0.00142832	Nr2f2	11819	2.84517
ENSMUSG00000061544	222.59	0.526653	0.00142933	Zfp229	381067	2.84487
ENSMUSG00000030421	1223.49	0.28059	0.00143597	Uri1	19777	2.84286
ENSMUSG00000022837	768.876	0.302702	0.00144907	Iqcb1	320299	2.83891
ENSMUSG00000026960	327.871	0.526557	0.00147022	Arl6ip6	65103	2.83262
ENSMUSG00000005362	1543.86	0.240936	0.00147771	Crbn	58799	2.83041
ENSMUSG00000053536	3017.23	0.203024	0.00148501	Cstf2t	83410	2.82827
ENSMUSG00000034663	397.643	0.434963	0.00148554	Bmp2k	140780	2.82812
ENSMUSG00000022744	1888.7	0.26702	0.00149098	Cldnd1	224250	2.82653
ENSMUSG00000022601	1080.45	0.299272	0.00149419	Zbtb11	271377	2.8256
ENSMUSG00000044667	22695.3	0.226434	0.00149997	Plppr4	229791	2.82392
ENSMUSG00000025128	6689.84	0.256451	0.00150191	Bhlhe22	59058	2.82336
ENSMUSG00000070544	4089.22	0.252763	0.00150881	Top1	21969	2.82136
ENSMUSG00000020326	3645.2	0.25584	0.00153519	Ccng1	12450	2.81384
ENSMUSG00000021027	6397.1	0.228334	0.00153519	Ralgapa1	56784	2.81384
ENSMUSG00000033577	2566.49	0.2164	0.0015408	Myo6	17920	2.81225
ENSMUSG00000020986	5889.08	0.205506	0.00154148	Sec23a	20334	2.81206
ENSMUSG00000027692	10834	0.196384	0.00155674	Tnik	665113	2.80778
ENSMUSG00000028341	8787.27	0.187597	0.00155759	Nr4a3	18124	2.80755
ENSMUSG00000034480	662.832	0.372314	0.0015626	Diaph2	54004	2.80615
ENSMUSG00000042298	2526.41	0.23836	0.00157444	Ttc19	72795	2.80287
ENSMUSG00000051166	2602.89	0.23568	0.00159104	Eml5	319670	2.79832
ENSMUSG00000026028	6410.29	0.195143	0.00160119	Trak2	70827	2.79556
ENSMUSG00000017831	1899.47	0.284697	0.00160119	Rab5a	271457	2.79556
ENSMUSG00000019951	2420.04	0.222406	0.00160499	Uhrf1bp1l	75089	2.79453
ENSMUSG00000037072	6037.75	0.194955	0.00161601	Selenof	93684	2.79156
ENSMUSG00000041328	1472.67	0.275301	0.00161601	Pcf11	74737	2.79156
ENSMUSG00000022136	1798.57	0.250819	0.00161601	Dnajc3	100037258	2.79156
ENSMUSG00000021413	3509.32	0.226707	0.00161601	Prpf4b	19134	2.79156
ENSMUSG00000059486	1276.96	0.277912	0.00162204	Kbtbd2	210973	2.78994
ENSMUSG00000006423	636.47	0.337068	0.00162221	C330007P06Rik	77644	2.78989
ENSMUSG00000100252	243.176	0.485092	0.00162221	Mir124-2hg	70441	2.78989
ENSMUSG00000028550	709.91	0.322771	0.00163426	Atg4c	242557	2.78668
ENSMUSG00000019857	445.327	0.399171	0.00163551	Asf1a	66403	2.78635
ENSMUSG00000051177	4676.62	0.216972	0.00164456	Plcb1	18795	2.78395
ENSMUSG00000039607	827.339	0.362697	0.00167453	Rbms3	207181	2.77611
ENSMUSG00000090015	235.795	0.582933	0.00169165	Gm15446	100642166	2.77169
ENSMUSG00000055026	653.899	0.326422	0.00169165	Gabrg3	14407	2.77169
ENSMUSG00000041685	953.611	0.672193	0.00169165	Fcho2	218503	2.77169
ENSMUSG00000024098	1795.38	0.258195	0.00169818	Twsg1	65960	2.77002
ENSMUSG00000026623	4533.84	0.226166	0.00172693	Lpgat1	226856	2.76273
ENSMUSG00000018427	1314.9	0.259266	0.00172712	Ypel2	77864	2.76268
ENSMUSG00000031200	124.458	0.742791	0.00173569	Mtcp1	17763	2.76053
ENSMUSG00000042408	2056.71	0.22623	0.00174687	Zmym6	100177	2.75774
ENSMUSG00000041040	2193.32	0.227448	0.00175891	Fam117b	72750	2.75476
ENSMUSG00000097825	106.019	0.790927	0.00175914	9630001P10Rik	319251	2.7547
ENSMUSG00000020580	4696.58	0.241149	0.00176302	Rock2	19878	2.75374
ENSMUSG00000001280	1243.36	0.284137	0.00176302	Sp1	20683	2.75374
ENSMUSG00000028820	6944.63	0.209563	0.00176997	Sfpq	71514	2.75203
ENSMUSG00000026409	1236.23	0.254463	0.00178233	Pfkfb2	18640	2.74901
ENSMUSG00000079509	500.348	0.381694	0.00178639	Zfx	22764	2.74802
ENSMUSG00000021051	3454.07	0.199565	0.00179367	Ppp2r5e	26932	2.74626
ENSMUSG00000087620	498.363	0.365616	0.00179997	5330434G04Rik	100043213	2.74474
ENSMUSG00000021209	1682.73	0.256937	0.00180067	Ppp4r4	74521	2.74457
ENSMUSG00000024109	16292.7	0.450976	0.0018013	Nrxn1	18189	2.74441
ENSMUSG00000024283	2910.34	0.214048	0.00180564	Wac	225131	2.74337
ENSMUSG00000097589	199.267	0.559858	0.00180877	Dleu2	668253	2.74262
ENSMUSG00000025986	2328.47	0.228544	0.00181156	Slc39a10	227059	2.74195
ENSMUSG00000029838	13918	0.265394	0.00181964	Ptn	19242	2.74001
ENSMUSG00000021519	431.483	0.368388	0.00182104	Mterf3	66410	2.73968
ENSMUSG00000001833	9266.93	0.468072	0.00182147	2021-09-07	235072	2.73958
ENSMUSG00000002265	12872.9	0.189628	0.00182803	Peg3	18616	2.73802
ENSMUSG00000032570	8994.38	0.207887	0.00185543	Atp2c1	235574	2.73156
ENSMUSG00000020608	1322.04	0.287319	0.00185543	Smc6	67241	2.73156
ENSMUSG00000020070	3091.44	0.238923	0.00187768	Rufy2	70432	2.72638
ENSMUSG00000032116	2096.89	0.229729	0.00187768	Stt3a	16430	2.72638
ENSMUSG00000063362	1188.96	0.289639	0.00188386	Alg11	207958	2.72495
ENSMUSG00000053253	3335.03	0.211133	0.00189855	Ndfip2	76273	2.72158
ENSMUSG00000053819	2970.78	0.225609	0.00192799	Camk2d	108058	2.7149
ENSMUSG00000024122	4031.65	0.185706	0.00192799	Pdpk1	18607	2.7149
ENSMUSG00000022124	2025.28	0.265579	0.00193776	Fbxl3	50789	2.7127
ENSMUSG00000016493	149.886	0.627814	0.00195049	Cd46	17221	2.70986
ENSMUSG00000063015	3632.03	0.230473	0.00196564	Ccni	12453	2.7065
ENSMUSG00000079555	151.533	0.619506	0.00196863	Haus3	231123	2.70584
ENSMUSG00000040537	6447.56	0.212455	0.00197155	Adam22	11496	2.70519
ENSMUSG00000035770	6418.31	0.180703	0.00197766	Dync1li2	234663	2.70385
ENSMUSG00000059890	4630.08	0.18466	0.00199229	Ube4a	140630	2.70065
ENSMUSG00000026748	1637.03	0.245711	0.00199491	Plxdc2	67448	2.70008
ENSMUSG00000024515	1319.76	0.240771	0.00202874	Smad4	17128	2.69277
ENSMUSG00000026014	4027.38	0.25087	0.00203076	Raph1	77300	2.69234
ENSMUSG00000042901	745.665	0.30891	0.00203076	Aida	108909	2.69234
ENSMUSG00000041124	2014.99	0.221462	0.00203076	Msantd4	78100	2.69234
ENSMUSG00000054843	4430.95	0.208388	0.00203076	Atrnl1	226255	2.69234
ENSMUSG00000040372	338.225	0.422293	0.00206713	Gpr63	81006	2.68463
ENSMUSG00000005312	6158.47	0.199455	0.00208409	Ubqln1	56085	2.68108
ENSMUSG00000067942	605.92	0.350016	0.00211913	Zfp160	224585	2.67384
ENSMUSG00000020074	3006.07	0.228563	0.00212023	Ccar1	67500	2.67362
ENSMUSG00000027797	24976.6	0.186702	0.00213478	Dclk1	13175	2.67065
ENSMUSG00000025199	1307.04	0.264128	0.00214217	Chuk	12675	2.66915
ENSMUSG00000053641	2233.48	0.226638	0.00214511	Dennd4a	102442	2.66855
ENSMUSG00000034724	1789.83	0.572852	0.00215336	Cnot6l	231464	2.66688
ENSMUSG00000072964	3990.08	0.18773	0.00218734	Bhlhb9	70237	2.66008
ENSMUSG00000021072	1833.19	0.564691	0.00219171	Tmx1	72736	2.65922
ENSMUSG00000020027	1090.21	0.262309	0.00219992	Socs2	216233	2.65759
ENSMUSG00000075700	5445.92	0.561999	0.00221357	Selenot	69227	2.65491
ENSMUSG00000071302	326.068	0.453295	0.00223194	2610044O15Rik8	72139	2.65132
ENSMUSG00000039913	1559.7	0.256697	0.00224901	Pak7	241656	2.64801
ENSMUSG00000028389	739.629	0.313112	0.00224942	Zfp37	22696	2.64793
ENSMUSG00000037111	4268.98	0.189769	0.0023299	Setd7	73251	2.63266
ENSMUSG00000059897	275.047	0.449665	0.0023326	Zfp930	234358	2.63216
ENSMUSG00000068748	29480	0.234944	0.00233958	Ptprz1	19283	2.63086
ENSMUSG00000064325	726.989	0.309545	0.00233958	Hhip	15245	2.63086
ENSMUSG00000054976	1459.09	0.581575	0.0023514	Nyap2	241134	2.62867
ENSMUSG00000003226	5570.23	0.222188	0.00237455	Ranbp2	19386	2.62442
ENSMUSG00000035696	1598.23	0.241325	0.00240302	Rnf38	73469	2.61924
ENSMUSG00000028289	1566.78	0.249659	0.0024166	Epha7	13841	2.6168
ENSMUSG00000040550	1393.31	0.257811	0.00243807	Otud6b	72201	2.61295
ENSMUSG00000019894	5395.18	0.18309	0.00243887	Slc6a15	103098	2.61281
ENSMUSG00000029647	1055.06	0.275305	0.00244281	Pan3	72587	2.61211
ENSMUSG00000029245	5636.7	0.202824	0.00245206	Epha5	13839	2.61047
ENSMUSG00000016200	1084.89	0.272464	0.00247394	Syt14	329324	2.60661
ENSMUSG00000056763	877.463	0.357408	0.0024849	Cspp1	211660	2.60469
ENSMUSG00000007812	1080.33	0.257889	0.0024849	Zfp655	72611	2.60469
ENSMUSG00000031357	1202.02	0.322364	0.00250507	Syap1	67043	2.60118
ENSMUSG00000098557	2015.82	0.82609	0.00250507	Kctd12	239217	2.60118
ENSMUSG00000020817	5823.71	0.186335	0.00252777	Rabep1	54189	2.59726
ENSMUSG00000015243	2941.54	0.19524	0.00253698	Abca1	11303	2.59568
ENSMUSG00000027272	2600.82	0.219871	0.00254059	Ubr1	22222	2.59507
ENSMUSG00000073792	335.872	0.433255	0.00254059	Alg6	320438	2.59507
ENSMUSG00000041417	6683.59	0.197084	0.0025428	Pik3r1	18708	2.59469
ENSMUSG00000026004	306.679	0.425072	0.00254766	Kansl1l	68691	2.59386
ENSMUSG00000042473	419.092	0.39938	0.00256526	Tbc1d8b	245638	2.59087
ENSMUSG00000050505	3113.49	0.198372	0.00257256	Pcdh20	219257	2.58963
ENSMUSG00000045414	359.217	0.408139	0.00258327	Dipk2a	68861	2.58783
ENSMUSG00000033031	304.375	0.443994	0.00259753	Cip2a	224171	2.58544
ENSMUSG00000062627	1044	0.333344	0.00260594	Mysm1	320713	2.58404
ENSMUSG00000034591	2443.51	0.248722	0.00260673	Slc41a2	338365	2.5839
ENSMUSG00000026675	2398.05	0.206711	0.00261324	Hsd17b7	15490	2.58282
ENSMUSG00000036437	666.535	0.302787	0.00263006	Npy1r	18166	2.58003
ENSMUSG00000032360	220.206	0.500739	0.00264725	Hcrtr2	387285	2.5772
ENSMUSG00000055723	1449.01	0.256479	0.00265788	Rras2	66922	2.57546
ENSMUSG00000005698	1682.36	0.226146	0.00267872	Ctcf	13018	2.57207
ENSMUSG00000031467	2445.38	0.225681	0.00268241	Agpat5	52123	2.57148
ENSMUSG00000071359	2153.1	0.256023	0.00268275	Tbpl1	237336	2.57142
ENSMUSG00000025451	2042.34	0.276503	0.002715	Paip1	218693	2.56623
ENSMUSG00000030016	4096.47	0.21144	0.00272238	Zfp638	18139	2.56505
ENSMUSG00000024511	599.126	0.358241	0.00272245	Rab27b	80718	2.56504
ENSMUSG00000027009	402.865	0.41694	0.0027624	Itga4	16401	2.55871
ENSMUSG00000040570	1967.14	0.227744	0.00281629	Rundc3b	242819	2.55032
ENSMUSG00000045427	1400.26	0.255737	0.00283679	Hnrnph2	56258	2.54717
ENSMUSG00000041225	1883.95	0.217351	0.00286382	Arhgap12	75415	2.54305
ENSMUSG00000022008	1479.4	0.255523	0.00286443	Gpalpp1	67467	2.54296
ENSMUSG00000033392	15093.9	0.176849	0.00286443	Clasp2	76499	2.54296
ENSMUSG00000072501	2390.73	0.25663	0.00286824	Phf20l1	239510	2.54238
ENSMUSG00000033282	1094.62	0.269479	0.00286988	Rpgrip1l	244585	2.54214
ENSMUSG00000047534	149.511	0.652848	0.00287797	Mis18bp1	217653	2.54091
ENSMUSG00000030753	3096.48	0.189162	0.00290782	Thap12	72981	2.53643
ENSMUSG00000009907	1260.87	0.246239	0.00291244	Vps4b	20479	2.53574
ENSMUSG00000027176	1222.08	0.275994	0.00292327	Cstf3	228410	2.53413
ENSMUSG00000027189	9554.12	0.166991	0.00293371	Trim44	80985	2.53258
ENSMUSG00000026764	37070.4	0.174993	0.00294287	Kif5c	16574	2.53123
ENSMUSG00000027180	2389.28	0.254988	0.00294287	Fbxo3	57443	2.53123
ENSMUSG00000024782	2585.85	0.204676	0.00294287	Ak3	56248	2.53123
ENSMUSG00000022749	1123.75	0.252222	0.00298274	Tbc1d23	67581	2.52538
ENSMUSG00000040123	877.636	0.271964	0.00301484	Zmym5	219105	2.52074
ENSMUSG00000014813	396.565	0.379611	0.00302444	Stc1	20855	2.51936
ENSMUSG00000052504	645.849	0.318067	0.00303653	Epha3	13837	2.51762
ENSMUSG00000021987	4312.36	0.210521	0.0030648	Mtmr6	219135	2.5136
ENSMUSG00000037685	9423.09	0.185262	0.00308494	Atp8a1	11980	2.51075
ENSMUSG00000029208	1664.58	0.259697	0.0031042	Guf1	231279	2.50805
ENSMUSG00000029234	1052.07	0.262273	0.0031042	Tmem165	21982	2.50805
ENSMUSG00000036099	2896.86	0.190656	0.0031042	Vezt	215008	2.50805
ENSMUSG00000026341	2825.1	0.192403	0.00311513	Actr3	74117	2.50652
ENSMUSG00000037965	1427.52	0.261931	0.00313226	Zc3h7a	106205	2.50414
ENSMUSG00000031878	1364.39	0.2487	0.00314725	Nae1	234664	2.50207
ENSMUSG00000021116	1298.55	0.24776	0.00316891	Eif2s1	13665	2.49909
ENSMUSG00000027792	163.865	0.553067	0.00317511	Bche	12038	2.49824
ENSMUSG00000032551	259.245	0.459374	0.00320371	1110059G10Rik	66202	2.49435
ENSMUSG00000025220	9358.76	0.16656	0.00320752	Oga	76055	2.49383
ENSMUSG00000064373	1646.99	0.235127	0.00321521	Selenop	20363	2.49279
ENSMUSG00000028414	2640.38	0.19981	0.00323623	Fktn	246179	2.48996
ENSMUSG00000038047	317.73	0.428179	0.00328014	Haus6	230376	2.48411
ENSMUSG00000048216	1705.9	0.222548	0.00328014	Gpr85	64450	2.48411
ENSMUSG00000060090	470.847	0.371184	0.0032813	Rp2	19889	2.48395
ENSMUSG00000049321	641.847	0.29794	0.00328437	Zfp2	22678	2.48355
ENSMUSG00000049001	447.921	0.389405	0.00328647	Ndnf	68169	2.48327
ENSMUSG00000042505	188.394	0.553069	0.00330985	Sdhaf3	71238	2.48019
ENSMUSG00000024583	2356.19	0.204334	0.00332697	Txnl1	53382	2.47795
ENSMUSG00000067336	7220.38	0.501548	0.00333859	Bmpr2	12168	2.47644
ENSMUSG00000067430	825.969	0.282708	0.00335365	Zfp763	73451	2.47448
ENSMUSG00000022995	5848.29	0.196461	0.00335474	Enah	13800	2.47434
ENSMUSG00000028578	217.891	0.53723	0.0033938	Caap1	67770	2.46931
ENSMUSG00000021578	2124.06	0.230452	0.0033985	Ccdc127	67433	2.46871
ENSMUSG00000095139	403.716	0.448984	0.00339886	Pou3f2	18992	2.46867
ENSMUSG00000026235	9767.04	0.166386	0.0034047	Epha4	13838	2.46792
ENSMUSG00000032384	1989.35	0.22087	0.00340486	Csnk1g1	214897	2.4679
ENSMUSG00000033943	3606.41	0.218997	0.0034174	Mga	29808	2.4663
ENSMUSG00000047242	1239.81	0.251698	0.0034239	Taf9b	407786	2.46548
ENSMUSG00000032386	1481.14	0.249221	0.00342509	Trip4	56404	2.46533
ENSMUSG00000008976	1061.56	0.302643	0.00344427	Gabpa	14390	2.4629
ENSMUSG00000055078	8431.2	0.163864	0.00345061	Gabra5	110886	2.4621
ENSMUSG00000027822	792.224	0.280721	0.00345677	Slc33a1	11416	2.46133
ENSMUSG00000089862	549.471	0.373215	0.00346498	Umad1	100036521	2.4603
ENSMUSG00000026904	5647.35	0.224396	0.0035924	Slc4a10	94229	2.44462
ENSMUSG00000023307	1286.21	0.254017	0.00361405	2021-03-05	69104	2.44201
ENSMUSG00000022151	849.838	0.279382	0.00363232	Ttc33	67515	2.43982
ENSMUSG00000020841	7429.89	0.186281	0.00364776	Cpd	12874	2.43797
ENSMUSG00000078622	2999.02	0.197492	0.0036567	Ccdc47	67163	2.43691
ENSMUSG00000086429	227.96	1.44508	0.00366862	Gt(ROSA)26Sor	14910	2.4355
ENSMUSG00000049470	10042	0.179754	0.00367345	Aff4	93736	2.43493
ENSMUSG00000031529	7432.05	0.173316	0.00369306	Tnks	21951	2.43261
ENSMUSG00000028249	5735.66	0.195724	0.00369639	Sdcbp	53378	2.43222
ENSMUSG00000053907	4758.42	0.186265	0.00370771	Mat2a	232087	2.43089
ENSMUSG00000025658	3528.8	0.223941	0.00374533	Cnksr2	245684	2.42651
ENSMUSG00000057614	7549.42	0.444246	0.00374533	Gnai1	14677	2.42651
ENSMUSG00000028426	7164.5	0.186872	0.00377128	Rad23b	19359	2.42351
ENSMUSG00000045967	3536.68	0.199278	0.00378284	Gpr158	241263	2.42218
ENSMUSG00000017686	2645.43	0.198618	0.00378284	Rhot1	59040	2.42218
ENSMUSG00000071281	434.676	0.367882	0.00378284	Zfp65	235907	2.42218
ENSMUSG00000036291	617.579	0.349569	0.00381376	Ap5m1	74385	2.41865
ENSMUSG00000022914	3640.62	0.200979	0.00383712	Brwd1	93871	2.41599
ENSMUSG00000026017	623.514	0.356423	0.00388683	Carf	241066	2.4104
ENSMUSG00000029064	24389.7	0.169877	0.00391748	Gnb1	14688	2.40699
ENSMUSG00000017376	1445.56	0.24209	0.00392246	Nlk	18099	2.40644
ENSMUSG00000032244	8150.32	0.189721	0.00393591	Fem1b	14155	2.40496
ENSMUSG00000032625	1633.32	0.246984	0.00399475	Thsd7a	330267	2.39851
ENSMUSG00000040339	2898.11	0.226753	0.00400963	Fam102b	329739	2.3969
ENSMUSG00000024976	2544.98	0.255875	0.00404766	Shoc2	56392	2.3928
ENSMUSG00000041431	67.151	0.881699	0.00405972	Ccnb1	268697	2.3915
ENSMUSG00000034755	1319.09	0.599678	0.00409144	Pcdh11x	245578	2.38812
ENSMUSG00000074637	1064	0.296577	0.00409144	Sox2	20674	2.38812
ENSMUSG00000058748	321.273	0.432067	0.00409144	Zfp958	233987	2.38812
ENSMUSG00000015653	223.784	0.513187	0.00410018	Steap2	74051	2.3872
ENSMUSG00000035045	661.036	0.302801	0.00412204	Zc3h12b	547176	2.38489
ENSMUSG00000031099	1589.99	0.251292	0.00412972	Smarca1	93761	2.38408
ENSMUSG00000020925	705.132	0.281927	0.00412972	Ccdc43	52715	2.38408
ENSMUSG00000026499	1352.92	0.248883	0.00424642	Acbd3	170760	2.37198
ENSMUSG00000042523	3662.58	0.172033	0.00425106	Dnal1	105000	2.3715
ENSMUSG00000003452	2026.76	0.571302	0.00426378	Bicd1	12121	2.37021
ENSMUSG00000049420	719.547	0.282555	0.00426378	Tmem200a	77220	2.37021
ENSMUSG00000091183	71.4405	0.812759	0.0042729	Gm5141	380850	2.36928
ENSMUSG00000035310	482.702	0.340032	0.00428869	Lin54	231506	2.36768
ENSMUSG00000044167	1717.08	0.241446	0.00429504	Foxo1	56458	2.36703
ENSMUSG00000040040	632.1	0.295319	0.0042978	Ift88	21821	2.36675
ENSMUSG00000078517	2022.27	0.22262	0.00433757	Emc1	230866	2.36275
ENSMUSG00000033499	4413.12	0.189517	0.00436061	Larp4b	217980	2.36045
ENSMUSG00000029169	3927.51	0.20778	0.00441544	Dhx15	13204	2.35503
ENSMUSG00000022247	648.337	0.296611	0.00444812	Brix1	67832	2.35182
ENSMUSG00000079065	789.886	0.321938	0.00444878	BC005561	100042165	2.35176
ENSMUSG00000023169	5682.59	0.179721	0.00448647	Slc38a1	105727	2.3481
ENSMUSG00000020948	539.349	0.321525	0.00449338	Klhl28	66689	2.34743
ENSMUSG00000036197	488.027	0.333555	0.00450243	Gxylt1	223827	2.34655
ENSMUSG00000023961	453.052	0.343289	0.00451301	Enpp4	224794	2.34553
ENSMUSG00000060427	421.573	0.358253	0.00452584	Zfp868	234362	2.3443
ENSMUSG00000032064	2059.85	0.219109	0.00453368	Dixdc1	330938	2.34355
ENSMUSG00000033460	2177.17	0.201753	0.00454601	Armcx1	78248	2.34237
ENSMUSG00000030061	2306.86	0.218889	0.00457301	Uba3	22200	2.3398
ENSMUSG00000013878	238.601	0.477012	0.00459618	Rnf170	77733	2.3376
ENSMUSG00000019841	7382.01	0.215685	0.00470971	Rev3l	19714	2.32701
ENSMUSG00000038546	2025.09	0.196558	0.00472031	Ranbp9	56705	2.32603
ENSMUSG00000059920	387.935	0.355838	0.00472031	4930453N24Rik	67609	2.32603
ENSMUSG00000067851	5132.25	0.1958	0.00472594	Arfgef1	211673	2.32551
ENSMUSG00000071253	1343.53	0.235371	0.00474537	Slc25a16	73132	2.32373
ENSMUSG00000018377	1147.66	0.250894	0.00476187	Vezf1	22344	2.32222
ENSMUSG00000022186	21708.8	0.152576	0.00478658	Oxct1	67041	2.31997
ENSMUSG00000041684	1117.62	0.24772	0.00479417	Bivm	246229	2.31929
ENSMUSG00000027531	1605.66	0.223928	0.00482515	Impa1	55980	2.31649
ENSMUSG00000057766	639.859	0.341	0.00483801	Ankrd29	225187	2.31533
ENSMUSG00000060771	777.87	0.320717	0.00485913	Tsga10	211484	2.31344
ENSMUSG00000015882	1059.85	0.607799	0.00486055	Lcorl	209707	2.31331
ENSMUSG00000055733	2023.23	0.304343	0.00487264	Nap1l3	54561	2.31224
ENSMUSG00000041986	5485.67	0.17683	0.00493082	Elmod1	270162	2.30708
ENSMUSG00000036641	693.975	0.29101	0.00494002	Ccdc148	227933	2.30627
ENSMUSG00000048661	1062.73	0.248605	0.00495898	Lemd3	380664	2.30461
ENSMUSG00000028926	5714.69	0.1882	0.00504343	Cdk14	18647	2.29727
ENSMUSG00000026436	656.1	0.35366	0.00504643	Elk4	13714	2.29702
ENSMUSG00000096916	284.438	0.439951	0.00505535	Zfp850	100043772	2.29625
ENSMUSG00000021930	1753.28	0.293675	0.00512329	Spryd7	66674	2.29045
ENSMUSG00000030861	2155.78	0.271552	0.00512598	Acadsb	66885	2.29022
ENSMUSG00000099696	186.192	0.508832	0.0051331	2900052N01Rik	73040	2.28962
ENSMUSG00000037286	1082.34	0.240667	0.00519494	Stag1	20842	2.28442
ENSMUSG00000043885	2925.23	0.204223	0.00520411	Slc36a4	234967	2.28365
ENSMUSG00000017677	3239.15	0.210222	0.00520694	Wsb1	78889	2.28342
ENSMUSG00000051098	2022.02	0.559599	0.0052467	Mblac2	72852	2.28011
ENSMUSG00000026374	3284.95	0.177668	0.00526495	Tsn	22099	2.27861
ENSMUSG00000024188	4656.27	0.164627	0.00526495	Luc7l	66978	2.27861
ENSMUSG00000000804	4173.62	0.202123	0.0052896	Usp32	237898	2.27658
ENSMUSG00000041658	2355.33	0.207714	0.00529344	Rragb	245670	2.27626
ENSMUSG00000027965	115.678	0.638928	0.0052938	Olfm3	229759	2.27623
ENSMUSG00000089857	272.935	0.416658	0.00534387	Zfp882	382019	2.27214
ENSMUSG00000051379	2253.97	0.222545	0.00535828	Flrt3	71436	2.27097
ENSMUSG00000073643	1746.44	0.219675	0.00538472	Wdfy1	69368	2.26884
ENSMUSG00000020366	6476.76	0.166965	0.00546433	Mapk9	26420	2.26246
ENSMUSG00000030067	918.361	0.265358	0.00546782	Foxp1	108655	2.26219
ENSMUSG00000029291	10075.5	0.170831	0.00551681	Rufy3	52822	2.25831
ENSMUSG00000066392	3049.2	0.204086	0.00551681	Nrxn3	18191	2.25831
ENSMUSG00000035566	5489.86	0.190537	0.00551988	Pcdh17	219228	2.25807
ENSMUSG00000055320	2022.68	0.209882	0.00553476	Tead1	21676	2.2569
ENSMUSG00000027665	2041.36	0.233426	0.00560942	Pik3ca	18706	2.25108
ENSMUSG00000047414	1732.81	0.256652	0.00560942	Flrt2	399558	2.25108
ENSMUSG00000031628	1813.17	0.237939	0.00567643	Casp3	12367	2.24593
ENSMUSG00000034158	2614.81	0.529358	0.00569229	Lrrc58	320184	2.24471
ENSMUSG00000025962	531.1	0.308821	0.00572939	Fastkd2	75619	2.24189
ENSMUSG00000057396	308.39	0.409868	0.00573391	Zfp759	268670	2.24155
ENSMUSG00000020922	1108.18	0.241018	0.00573992	Lsm12	268490	2.24109
ENSMUSG00000021537	1085.61	0.271026	0.00573992	Cetn3	12626	2.24109
ENSMUSG00000005360	25804.7	0.140361	0.00573992	Slc1a3	20512	2.24109
ENSMUSG00000058503	714.254	0.276502	0.00574257	Fam133b	68152	2.24089
ENSMUSG00000028528	11433.7	0.171479	0.00576529	Dnajc6	72685	2.23918
ENSMUSG00000036815	1377.52	0.234722	0.00579631	Dpp10	269109	2.23685
ENSMUSG00000024603	4714.55	0.181124	0.00581258	Dctn4	67665	2.23563
ENSMUSG00000060733	1138.45	0.242733	0.00581975	Ipmk	69718	2.2351
ENSMUSG00000024404	2154.38	0.193628	0.00586724	Riok3	66878	2.23157
ENSMUSG00000087370	3662.37	0.517359	0.005871	Tmem170b	621976	2.23129
ENSMUSG00000040473	325.536	0.410207	0.00588843	Cfap69	207686	2.23
ENSMUSG00000022451	1209.81	0.22845	0.00589493	Twf1	19230	2.22952
ENSMUSG00000028282	572.914	0.300413	0.00590561	Casp8ap2	26885	2.22874
ENSMUSG00000069135	552.54	0.303667	0.00590561	Fgfr1op	75296	2.22874
ENSMUSG00000071855	615.616	0.30076	0.00592134	Ccdc112	240261	2.22758
ENSMUSG00000041923	2514.67	0.201984	0.00593216	Nol4	319211	2.22679
ENSMUSG00000042032	2210.08	0.202332	0.00598867	Mat2b	108645	2.22267
ENSMUSG00000053825	8759.93	0.165424	0.00599674	Ppfia2	327814	2.22209
ENSMUSG00000030245	1236.95	0.226322	0.00602259	Golt1b	66964	2.22022
ENSMUSG00000025066	2541.1	0.211444	0.00602259	Sfr1	67788	2.22022
ENSMUSG00000049252	2071.56	0.221266	0.00609324	Lrp1b	94217	2.21515
ENSMUSG00000040021	2555.15	0.244594	0.00609332	Lats1	16798	2.21515
ENSMUSG00000020328	545.124	0.301884	0.00610483	Nudcd2	52653	2.21433
ENSMUSG00000037362	2024	0.217815	0.00611518	Ccn3	18133	2.21359
ENSMUSG00000020612	19711.6	0.186058	0.00615601	Prkar1a	19084	2.2107
ENSMUSG00000059974	3602.13	0.180107	0.00627551	Ntm	235106	2.20235
ENSMUSG00000024789	1586.36	0.209217	0.00629421	Jak2	16452	2.20106
ENSMUSG00000024780	1514.28	0.244495	0.0063015	Cdc37l1	67072	2.20056
ENSMUSG00000039987	848.017	0.258505	0.00638655	Phtf2	68770	2.19473
ENSMUSG00000036192	316.809	0.425596	0.00639956	Rorb	225998	2.19385
ENSMUSG00000062397	4786.85	0.169237	0.00642766	Zfp706	68036	2.19195
ENSMUSG00000066415	1193.89	0.237325	0.0064419	Msl2	77853	2.19099
ENSMUSG00000027751	1354.2	0.234521	0.00646042	Supt20	56790	2.18974
ENSMUSG00000071252	521.756	0.312947	0.00650823	2210408I21Rik	72371	2.18654
ENSMUSG00000033419	20711.8	0.145166	0.00651375	Snap91	20616	2.18617
ENSMUSG00000018442	1112.05	0.26712	0.00652421	Derl2	116891	2.18547
ENSMUSG00000048222	263.421	0.418808	0.00653816	Mfap1b	100034361	2.18454
ENSMUSG00000062470	106.22	0.640428	0.00656196	Fbxl12os	66662	2.18297
ENSMUSG00000041439	2722.93	0.18911	0.00659798	Mfsd6	98682	2.18059
ENSMUSG00000032009	4274.39	0.174403	0.00664127	Sesn3	75747	2.17775
ENSMUSG00000021171	2397.6	0.19846	0.00664759	Esyt2	52635	2.17734
ENSMUSG00000022829	1915.41	0.224635	0.00665223	Stxbp5l	207227	2.17703
ENSMUSG00000038658	1866.96	0.218185	0.00665223	Ric1	226089	2.17703
ENSMUSG00000018589	981.533	0.254149	0.00665609	Glra2	237213	2.17678
ENSMUSG00000030655	7691.86	0.168695	0.00668749	Smg1	233789	2.17474
ENSMUSG00000025920	4807.36	0.19064	0.0067365	Stau2	29819	2.17157
ENSMUSG00000028273	1903.86	0.213424	0.0067365	Pdlim5	56376	2.17157
ENSMUSG00000035151	617.452	0.31383	0.00674607	Elmod2	244548	2.17095
ENSMUSG00000015341	637.947	0.30593	0.00675806	Golga7	57437	2.17018
ENSMUSG00000012429	283.875	0.398554	0.00675806	Mplkip	66308	2.17018
ENSMUSG00000032667	1787.92	0.205089	0.00701774	Pon2	330260	2.1538
ENSMUSG00000037253	1668.51	0.223243	0.00703318	Mex3c	240396	2.15285
ENSMUSG00000008730	2618.11	0.218765	0.00703922	Hipk1	15257	2.15248
ENSMUSG00000057551	1067.77	0.234265	0.00705741	Zfp317	244713	2.15135
ENSMUSG00000038095	4435.51	0.204745	0.00706942	Sbno1	243272	2.15062
ENSMUSG00000038736	527.84	0.304579	0.0071536	Nudcd1	67429	2.14548
ENSMUSG00000021134	4799.67	0.18154	0.0071592	Srsf5	20384	2.14514
ENSMUSG00000040351	2572.43	0.218924	0.00716321	Ankib1	70797	2.14489
ENSMUSG00000025981	301.022	0.389979	0.00717412	Coq10b	67876	2.14423
ENSMUSG00000027858	276.481	0.408228	0.00717412	Tspan2	70747	2.14423
ENSMUSG00000059588	185.749	0.509485	0.0071899	Calcrl	54598	2.14328
ENSMUSG00000022897	2610.68	0.19027	0.0071899	Dyrk1a	13548	2.14328
ENSMUSG00000025912	152.682	0.586268	0.00721212	Mybl1	17864	2.14194
ENSMUSG00000068250	707.102	0.263994	0.00722058	Amn1	232566	2.14143
ENSMUSG00000006010	1909.13	0.203604	0.00731411	Odr4	226499	2.13584
ENSMUSG00000109901	515.088	0.387573	0.00737301	Chmp1b	67064	2.13236
ENSMUSG00000058331	72.6543	0.749593	0.0073935	Zfp85	22746	2.13115
ENSMUSG00000051527	1042.05	0.260824	0.00739922	Usp29	57775	2.13081
ENSMUSG00000063253	716.513	0.261083	0.00739927	Scoc	56367	2.13081
ENSMUSG00000039697	2709.84	0.225908	0.0074584	Ncoa7	211329	2.12735
ENSMUSG00000027652	4379.88	0.165876	0.00750374	Ralgapb	228850	2.12472
ENSMUSG00000022020	135.924	0.549338	0.00758626	Naa16	66897	2.11997
ENSMUSG00000034218	767.397	0.262676	0.00759114	Atm	11920	2.11969
ENSMUSG00000015002	2639.89	0.194855	0.00761246	Efr3a	76740	2.11847
ENSMUSG00000090110	107.24	0.614348	0.0077832	Cmc4	105886298	2.10884
ENSMUSG00000027835	362.231	0.445733	0.0077832	Pdcd10	56426	2.10884
ENSMUSG00000004110	8340.58	0.17031	0.00779898	Cacna1e	12290	2.10796
ENSMUSG00000052906	506.229	0.685729	0.00798087	Ubxn8	108159	2.09795
ENSMUSG00000018189	785.264	0.254985	0.0080772	Uchl5	56207	2.09274
ENSMUSG00000032905	3745.21	0.181137	0.0080772	Atg12	67526	2.09274
ENSMUSG00000038459	1419.22	0.215131	0.00808862	Abhd17c	70178	2.09213
ENSMUSG00000038280	1587.97	0.23785	0.00812504	Ostm1	14628	2.09017
ENSMUSG00000025813	2217.93	0.212906	0.00817705	Homer2	26557	2.0874
ENSMUSG00000030615	517.496	0.313829	0.00822953	Tmem126a	66271	2.08463
ENSMUSG00000026600	1549.45	0.245266	0.00828419	Soat1	20652	2.08175
ENSMUSG00000048490	1250.35	0.265603	0.00841153	Nrip1	268903	2.07512
ENSMUSG00000020620	1221.84	0.223454	0.00841976	Abca8b	27404	2.0747
ENSMUSG00000030313	1780.83	0.232947	0.00845851	Dennd5b	320560	2.07271
ENSMUSG00000037315	456.279	0.316676	0.00846693	Jade3	382207	2.07227
ENSMUSG00000021843	3521.54	0.193974	0.00849841	Ktn1	16709	2.07066
ENSMUSG00000090112	2511.49	0.18773	0.00854181	Shprh	268281	2.06845
ENSMUSG00000036769	700.315	0.287961	0.00867041	Wdr44	72404	2.06196
ENSMUSG00000025742	552.72	0.287342	0.00878468	Prps2	110639	2.05627
ENSMUSG00000069072	4959.23	0.158757	0.00879072	Slc7a14	241919	2.05598
ENSMUSG00000021113	515.389	0.294116	0.00880975	Snapc1	75627	2.05504
ENSMUSG00000027959	146.427	0.515494	0.0088199	Sass6	72776	2.05454
ENSMUSG00000050312	327.518	0.419385	0.0088634	Nsun3	106338	2.0524
ENSMUSG00000027522	1709.55	0.200102	0.00893084	Stx16	228960	2.04911
ENSMUSG00000037605	2600.24	0.207242	0.00896916	Adgrl3	319387	2.04725
ENSMUSG00000090031	143.738	0.664933	0.00904145	4732440D04Rik	654788	2.04376
ENSMUSG00000026163	10708	0.146446	0.00908274	Sphkap	77629	2.04178
ENSMUSG00000020029	3120.9	0.226805	0.00908274	Nudt4	71207	2.04178
ENSMUSG00000038784	1307.7	0.229296	0.00908366	Cnot4	53621	2.04174
ENSMUSG00000028995	2999.12	0.188384	0.00912461	Fam126a	84652	2.03979
ENSMUSG00000038965	1707.25	0.205106	0.00917114	Ube2l3	22195	2.03758
ENSMUSG00000024601	805.887	0.246717	0.00919621	Isoc1	66307	2.03639
ENSMUSG00000035764	1539.49	0.209722	0.00920247	Fbxo45	268882	2.0361
ENSMUSG00000025964	4361.34	0.176063	0.00921557	Adam23	23792	2.03548
ENSMUSG00000022960	600.917	0.278201	0.00926963	Donson	60364	2.03294
ENSMUSG00000028698	4461.18	0.153724	0.00929807	Pik3r3	18710	2.03161
ENSMUSG00000050965	10717.6	0.154044	0.00933672	Prkca	18750	2.02981
ENSMUSG00000063358	19272.3	0.141769	0.00958993	Mapk1	26413	2.01818
ENSMUSG00000021779	676.128	0.270277	0.00959471	Thrb	21834	2.01797
ENSMUSG00000021364	1369.61	0.218302	0.00961112	Elovl2	54326	2.01723
ENSMUSG00000046138	1855.71	0.205906	0.00966069	9930021J03Rik	240613	2.01499
ENSMUSG00000049717	613.232	0.276129	0.00975595	Lig4	319583	2.01073
ENSMUSG00000039519	497.291	0.294465	0.00976121	Cyp7b1	13123	2.0105
ENSMUSG00000041390	242.27	0.448786	0.00979368	Mdfic	16543	2.00905
ENSMUSG00000028347	3726.09	0.211709	0.00981209	Tmeff1	230157	2.00824
ENSMUSG00000037465	1250.52	0.218104	0.00983669	Klf10	21847	2.00715
ENSMUSG00000028771	1719.1	0.223715	0.00983807	Ptpn12	19248	2.00709
ENSMUSG00000035572	992.436	0.231741	0.00983852	Dcaf10	242418	2.00707
ENSMUSG00000071660	1073.84	0.234239	0.00986416	Ttc9c	70387	2.00594
ENSMUSG00000026491	1499.37	0.201978	0.0098928	Ahctf1	226747	2.00468
ENSMUSG00000094870	1038.61	0.278212	0.00993835	Zfp131	72465	2.00269
ENSMUSG00000024924	6402.68	0.149702	0.00998484	Vldlr	22359	2.00066
ENSMUSG00000027433	2805.99	0.179692	0.0100628	Xrn2	24128	1.99728
ENSMUSG00000020464	928.787	0.253763	0.0100628	Pnpt1	71701	1.99728
ENSMUSG00000079658	3480.67	0.478016	0.0102287	Eloc	67923	1.99018
ENSMUSG00000024054	1452.35	0.227528	0.0102287	Smchd1	74355	1.99018
ENSMUSG00000054469	1740.84	0.206087	0.0102518	Lclat1	225010	1.9892
ENSMUSG00000016150	2547.07	0.221403	0.0103766	Tenm1	23963	1.98394
ENSMUSG00000003418	173.167	0.50721	0.0103966	St8sia6	241230	1.98311
ENSMUSG00000027016	1215.74	0.213976	0.0104	Zfp385b	241494	1.98297
ENSMUSG00000036550	5008.12	0.162182	0.010441	Cnot1	234594	1.98126
ENSMUSG00000029366	956.437	0.236122	0.010531	Dck	13178	1.97753
ENSMUSG00000022329	751.095	0.298498	0.0105383	Stk3	56274	1.97723
ENSMUSG00000019873	1203.89	0.265919	0.0105526	Reep3	28193	1.97664
ENSMUSG00000021893	2169.84	0.178298	0.0105772	Capn7	12339	1.97563
ENSMUSG00000035367	95.7492	0.623787	0.0106097	Rmi1	74386	1.9743
ENSMUSG00000033054	732.988	0.26154	0.0107785	Npat	244879	1.96744
ENSMUSG00000027827	707.676	0.285245	0.0108526	Kcnab1	16497	1.96447
ENSMUSG00000026565	753.638	0.27827	0.0108556	Pou2f1	18986	1.96435
ENSMUSG00000026005	732.115	0.29007	0.0109362	Rpe	66646	1.96113
ENSMUSG00000057914	1440.49	0.204403	0.0109362	Cacnb2	12296	1.96113
ENSMUSG00000027001	441.587	0.354185	0.0109362	Dusp19	68082	1.96113
ENSMUSG00000024975	2872.17	0.195642	0.0109362	Pdcd4	18569	1.96113
ENSMUSG00000045140	204.173	0.436574	0.0110973	Pigw	70325	1.95478
ENSMUSG00000037822	3811.21	0.16589	0.0111602	Smim14	68552	1.95233
ENSMUSG00000034248	643.892	0.267034	0.0112049	Slc25a37	67712	1.95059
ENSMUSG00000005533	1381.01	0.215563	0.0112637	Igf1r	16001	1.94832
ENSMUSG00000025060	2788.98	0.18052	0.011284	Slk	20874	1.94754
ENSMUSG00000050558	181.837	0.460025	0.0113315	Prokr2	246313	1.94571
ENSMUSG00000040370	627.517	0.288824	0.0113315	Etfrf1	67636	1.94571
ENSMUSG00000039191	184.425	0.482412	0.011388	Rbpj	19664	1.94355
ENSMUSG00000047036	3164.06	0.175289	0.0113908	Zfp445	235682	1.94344
ENSMUSG00000007989	1905.89	0.197711	0.0113938	Fzd3	14365	1.94333
ENSMUSG00000048495	310.42	0.375786	0.0114031	Tyw5	68736	1.94298
ENSMUSG00000047496	681.091	0.27451	0.0114301	Rnf152	320311	1.94195
ENSMUSG00000033671	2273.34	0.182593	0.0114555	Cep350	74081	1.94098
ENSMUSG00000040943	1501.01	0.24046	0.0114555	Tet2	214133	1.94098
ENSMUSG00000036840	532.955	0.291538	0.0114555	Siah1a	20437	1.94098
ENSMUSG00000036712	1521.98	0.223561	0.0114555	Cyld	74256	1.94098
ENSMUSG00000068823	4642.38	0.16096	0.0115053	Csde1	229663	1.9391
ENSMUSG00000030386	232.275	0.419415	0.0117292	Zfp606	67370	1.93073
ENSMUSG00000058589	8369.44	0.154635	0.0117883	Anks1b	77531	1.92855
ENSMUSG00000061603	8468.29	0.167969	0.0118136	Akap6	238161	1.92762
ENSMUSG00000022280	1457.85	0.204716	0.0119004	Rnf19a	30945	1.92444
ENSMUSG00000064138	1345.28	0.233175	0.0119011	Fam172a	68675	1.92441
ENSMUSG00000027012	6074.18	0.170327	0.0119712	Dync1i2	13427	1.92186
ENSMUSG00000040044	1435.42	0.198996	0.0119712	Orc3	50793	1.92186
ENSMUSG00000040028	2326.74	0.206094	0.0119865	Elavl1	15568	1.92131
ENSMUSG00000032902	2176.79	0.176297	0.0120206	Slc16a1	20501	1.92008
ENSMUSG00000034640	898.875	0.26601	0.0120963	Tiparp	99929	1.91735
ENSMUSG00000027285	624.716	0.270913	0.0121079	Haus2	66296	1.91693
ENSMUSG00000069495	1438.59	0.226178	0.0121169	Epc2	227867	1.91661
ENSMUSG00000037999	1039.22	0.227173	0.0121169	Arap2	212285	1.91661
ENSMUSG00000049225	1707.86	0.193483	0.0122264	Pdp1	381511	1.9127
ENSMUSG00000030393	907.327	0.247074	0.012379	Zik1	22775	1.90731
ENSMUSG00000030660	737.797	0.275671	0.0124579	Pik3c2a	18704	1.90455
ENSMUSG00000024908	3056.66	0.165711	0.0124883	Ppp6r3	52036	1.9035
ENSMUSG00000028226	1352.88	0.218284	0.0124978	Mmp16	17389	1.90317
ENSMUSG00000034557	2105.47	0.177659	0.0125167	Zfyve9	230597	1.90251
ENSMUSG00000060149	155.075	0.490044	0.0125251	BC002059	213811	1.90222
ENSMUSG00000029385	2156.77	0.187015	0.012717	Ccng2	12452	1.89562
ENSMUSG00000020397	285.084	0.406488	0.012717	Med7	66213	1.89562
ENSMUSG00000040016	441.862	0.299468	0.0129228	Ptger3	19218	1.88864
ENSMUSG00000009905	828.251	0.24409	0.0129441	Kdsr	70750	1.88793
ENSMUSG00000021732	257.752	0.397823	0.0129441	Fgf10	14165	1.88793
ENSMUSG00000027778	597.749	0.261783	0.0130077	Ift80	68259	1.8858
ENSMUSG00000024145	174.162	0.458977	0.0130562	Pigf	18701	1.88418
ENSMUSG00000029617	1096.83	0.208795	0.0130872	Ccz1	231874	1.88315
ENSMUSG00000025266	9930.62	0.152621	0.0131005	Gnl3l	237107	1.88271
ENSMUSG00000042743	2559.11	0.175423	0.0131097	Sgtb	218544	1.88241
ENSMUSG00000033352	7220.4	0.142105	0.0131217	Map2k4	26398	1.88201
ENSMUSG00000049658	1691.25	0.208214	0.0131221	Bdp1	544971	1.882
ENSMUSG00000019790	4528.5	0.186708	0.0131463	Stxbp5	78808	1.8812
ENSMUSG00000075595	1922.84	0.19994	0.0131802	Zfp652	268469	1.88008
ENSMUSG00000038760	258.653	0.406703	0.013184	Trhr	22045	1.87995
ENSMUSG00000002733	751.298	0.257321	0.0132992	Plekha3	83435	1.87617
ENSMUSG00000062743	97.4344	0.618301	0.0133371	Zfp677	210503	1.87494
ENSMUSG00000022604	439.697	0.309282	0.0133515	Cep97	74201	1.87447
ENSMUSG00000072623	1210.05	0.215651	0.0134449	Zfp9	22750	1.87144
ENSMUSG00000029178	1407.25	0.237784	0.0134641	Klf3	16599	1.87082
ENSMUSG00000026319	3449.66	0.165434	0.0135004	Relch	227446	1.86965
ENSMUSG00000030201	2010.07	0.198134	0.0135287	Lrp6	16974	1.86874
ENSMUSG00000025019	447.351	0.329553	0.0136193	Lcor	212391	1.86585
ENSMUSG00000020130	713.425	0.294432	0.0136281	Tbc1d15	66687	1.86556
ENSMUSG00000074968	347.475	0.362684	0.013744	Ano3	228432	1.86189
ENSMUSG00000043535	3218.2	0.191682	0.0138699	Setx	269254	1.85793
ENSMUSG00000022672	1080.37	0.219731	0.0139273	Prkdc	19090	1.85613
ENSMUSG00000071291	96.3704	0.617393	0.014069	Zfp58	238693	1.85174
ENSMUSG00000032320	2946.8	0.172139	0.0140793	Rcn2	26611	1.85142
ENSMUSG00000024242	3036.47	0.20183	0.0140793	Map4k3	225028	1.85142
ENSMUSG00000021036	2113.19	0.180184	0.0140828	Sptlc2	20773	1.85131
ENSMUSG00000049659	2062.54	0.177207	0.014166	Aftph	216549	1.84875
ENSMUSG00000043415	210.287	0.432506	0.0141703	Otud1	71198	1.84862
ENSMUSG00000025001	209.89	0.444255	0.0141811	Hells	15201	1.84829
ENSMUSG00000062604	6225.24	0.176281	0.0142075	Srpk2	20817	1.84748
ENSMUSG00000019230	416.027	0.311708	0.0143105	Lhx9	16876	1.84435
ENSMUSG00000011958	886.958	0.230464	0.0143798	Bnip2	12175	1.84225
ENSMUSG00000056211	5733.76	0.15617	0.0145429	R3hdm1	226412	1.83735
ENSMUSG00000019927	1625.2	0.203068	0.0145474	Ube2d1	216080	1.83721
ENSMUSG00000035329	489.192	0.312923	0.0145474	Fbxo33	70611	1.83721
ENSMUSG00000090053	488.816	0.298383	0.0145536	Palm2	242481	1.83703
ENSMUSG00000042508	2077.17	0.175865	0.0145567	Dmtf1	23857	1.83694
ENSMUSG00000039968	660.148	0.59981	0.0145894	Rsbn1l	242860	1.83596
ENSMUSG00000030254	290.801	0.359705	0.0147335	Rad18	58186	1.8317
ENSMUSG00000030779	2624.68	0.198215	0.0147553	Rbbp6	19647	1.83105
ENSMUSG00000036667	18620.1	0.130224	0.0148833	Tcaf1	77574	1.8273
ENSMUSG00000021054	1061.4	0.544192	0.0148909	Sgpp1	81535	1.82708
ENSMUSG00000029426	5116	0.157391	0.0148979	Scarb2	12492	1.82687
ENSMUSG00000069539	1595.56	0.192568	0.0149056	Scyl2	213326	1.82665
ENSMUSG00000047554	605.334	0.281031	0.0149176	Tmem41b	233724	1.8263
ENSMUSG00000046836	1003.29	0.215538	0.0149754	Brox	71678	1.82462
ENSMUSG00000028312	572.457	0.314542	0.0149846	Smc2	14211	1.82436
ENSMUSG00000062203	3309.33	0.17718	0.0150709	Gspt1	14852	1.82186
ENSMUSG00000000861	3432.53	0.18252	0.0151094	Bcl11a	14025	1.82075
ENSMUSG00000086095	78.101	0.678339	0.0152037	Gm15328	328906	1.81805
ENSMUSG00000036766	15092	0.148563	0.0152443	Dner	227325	1.81689
ENSMUSG00000027349	1026.35	0.222723	0.0152746	Fam98b	68215	1.81603
ENSMUSG00000031604	10448.4	0.135153	0.0152757	Msmo1	66234	1.816
ENSMUSG00000015961	2587.03	0.190327	0.0153794	Adss	11566	1.81306
ENSMUSG00000020134	1588.43	0.235335	0.0155356	Peli1	67245	1.80867
ENSMUSG00000021238	1524.61	0.22418	0.0155563	Aldh6a1	104776	1.80809
ENSMUSG00000027698	1679.92	0.195359	0.0155575	Nceh1	320024	1.80806
ENSMUSG00000074166	110.699	0.611476	0.0156253	AW146154	101835	1.80617
ENSMUSG00000022781	1895.37	0.185638	0.0158285	Pak2	224105	1.80056
ENSMUSG00000025766	254.578	0.373529	0.0158527	D3Ertd751e	73852	1.7999
ENSMUSG00000032409	727.476	0.264454	0.015889	Atr	245000	1.7989
ENSMUSG00000033382	2079.97	0.195198	0.0159443	Trappc8	75964	1.79739
ENSMUSG00000038122	926.563	0.235697	0.0161371	Tbc1d32	544696	1.79218
ENSMUSG00000032199	3269.35	0.156384	0.0161435	Polr2m	28015	1.792
ENSMUSG00000022661	5165.18	0.155748	0.0161541	Cd200	17470	1.79172
ENSMUSG00000014767	867.363	0.236511	0.0163872	Tbp	21374	1.7855
ENSMUSG00000030604	290.379	0.354612	0.0165451	Zfp626	71163	1.78133
ENSMUSG00000027737	566.38	0.311289	0.0165709	Slc7a11	26570	1.78065
ENSMUSG00000030870	3556.03	0.162452	0.0166891	Ubfd1	28018	1.77757
ENSMUSG00000043467	1101.85	0.50682	0.0167428	Zbtb37	240869	1.77617
ENSMUSG00000005534	1851.28	0.184889	0.0167428	Insr	16337	1.77617
ENSMUSG00000049184	785.609	0.244422	0.0167428	Purg	75029	1.77617
ENSMUSG00000035173	1815.22	0.193074	0.0167572	Ccdc186	213993	1.7758
ENSMUSG00000079659	162.731	0.479788	0.0168876	Tmem243	652925	1.77243
ENSMUSG00000021728	245.469	0.381732	0.0169135	Emb	13723	1.77177
ENSMUSG00000052544	741.638	0.233701	0.0169663	St6galnac3	20447	1.77041
ENSMUSG00000007836	3678.38	0.179048	0.0169663	Hnrnpa0	77134	1.77041
ENSMUSG00000039652	1257.11	0.249982	0.0169663	Cpeb3	208922	1.77041
ENSMUSG00000033364	906.224	0.236582	0.017042	Usp37	319651	1.76848
ENSMUSG00000064127	3104.12	0.168896	0.0170458	Med14	26896	1.76838
ENSMUSG00000035681	948.444	0.230143	0.0171063	Kcnc2	268345	1.76684
ENSMUSG00000028218	1483.51	0.203544	0.017209	Fam92a	68099	1.76424
ENSMUSG00000059187	901.809	0.250337	0.017209	Tafa1	320265	1.76424
ENSMUSG00000024498	2236.07	0.173154	0.017209	Tcerg1	56070	1.76424
ENSMUSG00000031347	1411.13	0.189273	0.0172408	Cetn2	26370	1.76344
ENSMUSG00000003198	123.232	0.516621	0.0174099	Zfp959	224893	1.7592
ENSMUSG00000001542	275.446	0.425864	0.0174293	Ell2	192657	1.75872
ENSMUSG00000051323	5329.03	0.19609	0.0174297	Pcdh19	279653	1.75871
ENSMUSG00000027167	498.9	0.279993	0.0175117	Elp4	77766	1.75667
ENSMUSG00000031283	134.512	0.515248	0.0175117	Chrdl1	83453	1.75667
ENSMUSG00000022822	5856.84	0.137865	0.0175117	Abcc5	27416	1.75667
ENSMUSG00000106864	629.394	0.249403	0.0176183	Gtf3c2	71752	1.75404
ENSMUSG00000031174	473.7	0.28465	0.0176317	Rpgr	19893	1.75371
ENSMUSG00000060073	930.207	0.232941	0.017835	Psma3	19167	1.74873
ENSMUSG00000098188	502.808	0.283119	0.0179027	Sowahc	268301	1.74708
ENSMUSG00000020349	12763.3	0.130603	0.0179038	Ppp2ca	19052	1.74705
ENSMUSG00000019948	751.998	0.290324	0.0179072	Actr6	67019	1.74697
ENSMUSG00000047910	405.506	0.315804	0.0179835	Pcdhb16	93887	1.74513
ENSMUSG00000071753	350.423	0.367068	0.0180413	C230004F18Rik	331424	1.74373
ENSMUSG00000022108	14089.4	0.128945	0.01808	Itm2b	16432	1.7428
ENSMUSG00000028690	544.691	0.266225	0.0181337	Mmachc	67096	1.74151
ENSMUSG00000063884	1660.33	0.180156	0.0181809	Ptcd3	69956	1.74039
ENSMUSG00000031555	2274.27	0.182092	0.0183243	Adam9	11502	1.73697
ENSMUSG00000037905	4421.95	0.154504	0.0183532	Bri3bp	76809	1.73629
ENSMUSG00000069045	1368.43	0.581052	0.0183581	Ddx3y	26900	1.73617
ENSMUSG00000042305	3281.24	0.150066	0.018386	Tmem183a	57439	1.73551
ENSMUSG00000000184	15056.8	0.148705	0.018386	Ccnd2	12444	1.73551
ENSMUSG00000016409	616.429	0.298744	0.0184366	Nkap	67050	1.73432
ENSMUSG00000030031	182.502	0.435589	0.0184576	Kbtbd8	243574	1.73383
ENSMUSG00000019961	712.959	0.279684	0.0184576	Tmpo	21917	1.73383
ENSMUSG00000036934	351.156	0.336172	0.0184718	4921524J17Rik	66714	1.73349
ENSMUSG00000027087	1273.84	0.23513	0.018788	Itgav	16410	1.72612
ENSMUSG00000009828	1880.82	0.179625	0.0188327	Ick	56542	1.72509
ENSMUSG00000072969	565.398	0.256382	0.0189545	Armcx5	494468	1.72229
ENSMUSG00000041220	5340.95	0.149539	0.0190754	Elovl6	170439	1.71953
ENSMUSG00000019777	3332.37	0.166474	0.0190889	Hdac2	15182	1.71922
ENSMUSG00000030509	587.594	0.272229	0.0191914	Asb7	117589	1.71689
ENSMUSG00000000605	8214.93	0.142804	0.0192111	Clcn4	12727	1.71645
ENSMUSG00000079184	1992.91	0.19309	0.0192666	Mphosph8	75339	1.7152
ENSMUSG00000048106	545.95	0.263575	0.0193484	4632415L05Rik	70808	1.71335
ENSMUSG00000035164	496.828	0.31207	0.0195076	Zc3h12c	244871	1.7098
ENSMUSG00000026110	1307.11	0.19375	0.0196251	Mgat4a	269181	1.70719
ENSMUSG00000042390	3346.35	0.180494	0.0197357	Gatad2b	229542	1.70475
ENSMUSG00000044763	432.074	0.335404	0.0197633	Trmt10c	52575	1.70414
ENSMUSG00000042225	111.566	0.555771	0.0197633	Ammecr1	56068	1.70414
ENSMUSG00000026683	128.749	0.533947	0.0198724	Nuf2	66977	1.70175
ENSMUSG00000041966	918.812	0.221052	0.0199013	Dcaf17	75763	1.70112
ENSMUSG00000031134	3052.32	0.15308	0.0199288	Rbmx	19655	1.70052
ENSMUSG00000021047	731.258	0.320781	0.01997	Nova1	664883	1.69962
ENSMUSG00000036898	962.563	0.213262	0.0200806	Zfp157	72154	1.69722
ENSMUSG00000020361	12220.7	0.132407	0.020123	Hspa4	15525	1.69631
ENSMUSG00000026994	194.316	0.446281	0.0201769	Galnt3	14425	1.69515
ENSMUSG00000021738	732.085	0.246735	0.0203075	Atxn7	246103	1.69234
ENSMUSG00000030446	102.288	0.555067	0.0203075	Zfp273	212569	1.69234
ENSMUSG00000051341	103.482	0.554236	0.0203075	Zfp52	22710	1.69234
ENSMUSG00000027699	169.988	0.469218	0.0203273	Ect2	13605	1.69192
ENSMUSG00000014353	1457.54	0.207719	0.0203929	Tmem87b	72477	1.69052
ENSMUSG00000027281	340.513	0.319709	0.0203953	Slx4ip	74243	1.69047
ENSMUSG00000056536	718.424	0.268666	0.0204562	Pign	27392	1.68918
ENSMUSG00000032712	341.893	0.318085	0.0205276	Resf1	67246	1.68766
ENSMUSG00000042699	7525.88	0.157003	0.0205444	Dhx9	13211	1.68731
ENSMUSG00000037486	1059.51	0.207016	0.0206805	Asxl2	75302	1.68444
ENSMUSG00000021057	1785.3	0.23179	0.0207086	Akap5	238276	1.68385
ENSMUSG00000035401	1920.29	0.184189	0.0208691	Emsy	233545	1.6805
ENSMUSG00000026827	4485.89	0.15059	0.0208956	Gpd2	14571	1.67994
ENSMUSG00000053870	939.506	0.249476	0.0209602	Fpgt	75540	1.67861
ENSMUSG00000089911	1480.91	0.20062	0.0209773	Mfsd14a	15247	1.67825
ENSMUSG00000024045	1842.17	0.17145	0.0210899	Akap8	56399	1.67593
ENSMUSG00000055761	1553.43	0.213028	0.0211818	Nkain3	269513	1.67404
ENSMUSG00000060961	5657.16	0.157953	0.0211907	Slc4a4	54403	1.67385
ENSMUSG00000010721	1769.32	0.175761	0.02129	Lmbr1	56873	1.67182
ENSMUSG00000039841	357.819	0.362255	0.0214358	Zfp800	627049	1.66886
ENSMUSG00000046204	2899.15	0.164291	0.0216246	Pnma2	239157	1.66505
ENSMUSG00000024521	277.162	0.353799	0.0218594	Pmaip1	58801	1.66036
ENSMUSG00000038836	281.201	0.36293	0.022016	Agbl3	76223	1.65726
ENSMUSG00000040102	1006.42	0.213074	0.0220239	Klhl42	232539	1.65711
ENSMUSG00000020170	1487.01	0.185873	0.0220239	Frs2	327826	1.65711
ENSMUSG00000058704	907.662	0.228458	0.0220239	Memo1	76890	1.65711
ENSMUSG00000047126	28223.1	0.121672	0.0220664	Cltc	67300	1.65627
ENSMUSG00000048109	438.97	0.337543	0.0221359	Rbm15	229700	1.6549
ENSMUSG00000037533	921.851	0.211345	0.0221835	Rapgef6	192786	1.65397
ENSMUSG00000027086	521.153	0.280121	0.0222535	Fastkd1	320720	1.6526
ENSMUSG00000110277	289.778	0.374728	0.0222645	Gm45871	108168395	1.65239
ENSMUSG00000029283	499.206	0.274348	0.0222677	Cdc7	12545	1.65233
ENSMUSG00000030209	23699.1	0.198449	0.0222677	Grin2b	14812	1.65233
ENSMUSG00000039542	20206.7	0.158759	0.0224165	Ncam1	17967	1.64943
ENSMUSG00000004085	440.678	0.288626	0.0226337	Map3k20	65964	1.64524
ENSMUSG00000029776	840.419	0.2151	0.0226337	Hibadh	58875	1.64524
ENSMUSG00000031617	2023.63	0.179714	0.0226337	Tmem184c	234463	1.64524
ENSMUSG00000040724	3876.67	0.154655	0.0226369	Kcna2	16490	1.64518
ENSMUSG00000035954	8918.68	0.147052	0.0227392	Dock4	238130	1.64322
ENSMUSG00000056832	488.413	0.263833	0.0229011	Ttc26	264134	1.64014
ENSMUSG00000033808	1370.34	0.187504	0.0230829	Tmem87a	211499	1.63671
ENSMUSG00000050447	754.703	0.230331	0.0231106	Lypd6	320343	1.63619
ENSMUSG00000070880	7109.64	0.129182	0.0231268	Gad1	14415	1.63588
ENSMUSG00000027379	167.954	0.450611	0.0231268	Bub1	12235	1.63588
ENSMUSG00000034825	17530.1	0.134239	0.0231562	Nrip3	78593	1.63533
ENSMUSG00000021557	7750.5	0.140562	0.0231699	Agtpbp1	67269	1.63508
ENSMUSG00000054823	3051.83	0.16263	0.0232363	Nsd3	234135	1.63383
ENSMUSG00000029202	1965.57	0.180616	0.0233505	Pds5a	71521	1.6317
ENSMUSG00000001630	352.011	0.314772	0.0233505	Stk38l	232533	1.6317
ENSMUSG00000049516	722.605	0.243885	0.0234344	Spty2d1	101685	1.63015
ENSMUSG00000038143	5841.22	0.152165	0.023474	Stox2	71069	1.62941
ENSMUSG00000022339	404.475	0.320961	0.0234774	Ebag9	55960	1.62935
ENSMUSG00000041540	991.575	0.23773	0.0234858	Sox5	20678	1.62919
ENSMUSG00000068882	4093.41	0.163238	0.0235192	Ssb	20823	1.62858
ENSMUSG00000029821	538.436	0.271945	0.0235192	Gsdme	54722	1.62858
ENSMUSG00000024384	1312.53	0.212994	0.0235814	Iws1	73473	1.62743
ENSMUSG00000005886	3482.18	0.158026	0.0236501	Ncoa2	17978	1.62617
ENSMUSG00000057335	7859.34	0.157339	0.0236808	Cep170	545389	1.6256
ENSMUSG00000042182	3722.11	0.162655	0.0237451	Bend6	320705	1.62443
ENSMUSG00000073427	189.388	0.404423	0.0237451	Gm4924	237412	1.62443
ENSMUSG00000040433	649.621	0.244691	0.0237451	Zbtb38	245007	1.62443
ENSMUSG00000025898	493.479	0.277761	0.0237882	Cwf19l2	244672	1.62364
ENSMUSG00000024487	1160	0.202763	0.0237882	Yipf5	67180	1.62364
ENSMUSG00000031592	4318.37	0.16682	0.0238595	Pcm1	18536	1.62234
ENSMUSG00000032827	3985.95	0.155276	0.023867	Ppp1r9a	243725	1.6222
ENSMUSG00000030224	5716.47	0.143921	0.0238892	Strap	20901	1.6218
ENSMUSG00000042029	435.963	0.283086	0.0239615	Ncapg2	76044	1.62049
ENSMUSG00000043300	1632.08	0.184196	0.024066	B3galnt1	26879	1.6186
ENSMUSG00000023960	4780.16	0.143035	0.0241136	Enpp5	83965	1.61774
ENSMUSG00000061130	889.109	0.217654	0.0241778	Ppm1b	19043	1.61658
ENSMUSG00000029229	595.41	0.266131	0.0242287	Chic2	74277	1.61567
ENSMUSG00000032405	1410.46	0.18592	0.0242822	Pias1	56469	1.61471
ENSMUSG00000032228	2959.6	0.160553	0.0243172	Tcf12	21406	1.61409
ENSMUSG00000035614	1586.08	0.196107	0.0243172	Togaram1	328108	1.61409
ENSMUSG00000031352	570.496	0.325266	0.0244865	Hccs	15159	1.61107
ENSMUSG00000039285	1535.12	0.189848	0.0245084	Azi2	27215	1.61068
ENSMUSG00000027014	1467.81	0.209329	0.0245304	Cwc22	80744	1.6103
ENSMUSG00000034801	1160.63	0.228696	0.0251927	Sos2	20663	1.59872
ENSMUSG00000026655	1000.11	0.203994	0.025232	Fam107b	66540	1.59805
ENSMUSG00000037894	158.212	0.436784	0.0252847	H2afz	51788	1.59714
ENSMUSG00000022353	4627.93	0.151741	0.0253848	Mtss1	211401	1.59543
ENSMUSG00000023927	1029.05	0.211825	0.0259299	Satb1	20230	1.5862
ENSMUSG00000026102	911.837	0.22047	0.0259907	Inpp1	16329	1.58518
ENSMUSG00000021488	6783.95	0.153384	0.0259907	Nsd1	18193	1.58518
ENSMUSG00000024974	1967.46	0.174418	0.0263157	Smc3	13006	1.57979
ENSMUSG00000026586	411.681	0.308602	0.0264201	Prrx1	18933	1.57807
ENSMUSG00000025024	602.41	0.255147	0.0265434	Smndc1	76479	1.57604
ENSMUSG00000070695	467.057	0.289127	0.0265846	Cntnap5a	636808	1.57537
ENSMUSG00000048720	761.892	0.245587	0.0266935	Tbc1d12	209478	1.57359
ENSMUSG00000086370	367.605	0.30886	0.026767	Ftx	78878	1.5724
ENSMUSG00000025915	169.097	0.437772	0.0267921	Sgk3	170755	1.57199
ENSMUSG00000064289	554.599	0.264143	0.0269373	Tank	21353	1.56965
ENSMUSG00000029910	283.17	0.348801	0.0272283	Mad2l1	56150	1.56498
ENSMUSG00000034009	134.518	0.513063	0.0274272	Rxfp1	381489	1.56182
ENSMUSG00000029761	1038.8	0.23612	0.0274726	Cald1	109624	1.5611
ENSMUSG00000030850	3458.17	0.154518	0.0275767	Ate1	11907	1.55946
ENSMUSG00000022195	1207.89	0.204358	0.0276373	6030458C11Rik	77877	1.55851
ENSMUSG00000027088	739.96	0.220393	0.0277241	Phospho2	73373	1.55714
ENSMUSG00000033629	6877.48	0.14299	0.0277241	Hacd3	57874	1.55714
ENSMUSG00000037643	1882.97	0.172609	0.0278719	Prkci	18759	1.55483
ENSMUSG00000026473	9271.96	0.136744	0.0279483	Glul	14645	1.55364
ENSMUSG00000037001	340.588	0.311365	0.0280636	Zfp39	22698	1.55186
ENSMUSG00000063972	334.484	0.305096	0.0280748	Nr6a1	14536	1.55168
ENSMUSG00000079317	328.313	0.36259	0.0282286	Trappc2	66226	1.54931
ENSMUSG00000035376	926.305	0.202412	0.0285841	Hacd2	70757	1.54388
ENSMUSG00000055660	259.211	0.356053	0.0285882	Mettl4	76781	1.54381
ENSMUSG00000063049	618.057	0.243376	0.0286268	Ing2	69260	1.54323
ENSMUSG00000050663	867.7	0.228103	0.0287919	Trhde	237553	1.54073
ENSMUSG00000026490	8620.7	0.146802	0.0289555	Cdc42bpa	226751	1.53827
ENSMUSG00000042807	1364.46	0.178592	0.0289674	Hecw2	329152	1.53809
ENSMUSG00000026188	1185.8	0.193444	0.0290914	Tmem169	271711	1.53624
ENSMUSG00000039086	2093.95	0.160434	0.0290914	Ss18l1	269397	1.53624
ENSMUSG00000061455	1501.8	0.192696	0.0290915	Stx17	67727	1.53623
ENSMUSG00000024817	1520.76	0.173853	0.029122	Uhrf2	109113	1.53578
ENSMUSG00000032224	4112.91	0.165495	0.0291253	Fam81a	76886	1.53573
ENSMUSG00000024647	276.028	0.329087	0.0292417	Cbln2	12405	1.534
ENSMUSG00000022142	1138.17	0.190078	0.0294895	Nup155	170762	1.53033
ENSMUSG00000029735	172.601	0.414464	0.0295401	Tpk1	29807	1.52959
ENSMUSG00000034101	479.989	0.282692	0.0296053	Ctnnd1	12388	1.52863
ENSMUSG00000049969	337.862	0.314104	0.0296495	Plekhf2	71801	1.52798
ENSMUSG00000026576	35041	0.122913	0.0298137	Atp1b1	11931	1.52558
ENSMUSG00000046434	321.667	0.674353	0.0298137	Hnrnpa1	15382	1.52558
ENSMUSG00000022757	2866.58	0.165972	0.0298137	Tfg	21787	1.52558
ENSMUSG00000027680	2046.34	0.190777	0.0298521	Fxr1	14359	1.52503
ENSMUSG00000022629	5305.36	0.160819	0.0300976	Kif21a	16564	1.52147
ENSMUSG00000099083	1221.64	0.185151	0.0300976	Atf7	223922	1.52147
ENSMUSG00000032251	330.456	0.315659	0.03022	Irak1bp1	65099	1.51971
ENSMUSG00000016386	1204.69	0.190633	0.0303171	Mpped2	77015	1.51831
ENSMUSG00000039701	517.422	0.266619	0.0303237	Usp53	99526	1.51822
ENSMUSG00000049612	1307.34	0.193183	0.0303278	Omg	18377	1.51816
ENSMUSG00000042396	534.636	0.246664	0.0304164	Rbm7	67010	1.51689
ENSMUSG00000066551	261.23	0.343591	0.0305068	Hmgb1	15289	1.5156
ENSMUSG00000050812	4820.94	0.142729	0.0306804	Ecpas	230249	1.51314
ENSMUSG00000061665	269.19	0.345588	0.0308227	Cd2ap	12488	1.51113
ENSMUSG00000021470	606.251	0.241109	0.0308259	Ercc6l2	76251	1.51108
ENSMUSG00000022070	99.6929	0.581067	0.0309028	Bora	77744	1.51
ENSMUSG00000061666	2783.27	0.144918	0.0309028	Gdpd1	66569	1.51
ENSMUSG00000097545	2620.67	0.146557	0.0309029	Mir124a-1hg	268755	1.51
ENSMUSG00000034701	1215.02	0.577894	0.030905	Neurod1	18012	1.50997
ENSMUSG00000009376	455.878	0.273755	0.0310664	Met	17295	1.50771
ENSMUSG00000037104	1488.9	0.177592	0.031184	Socs5	56468	1.50607
ENSMUSG00000020572	2663.61	0.161421	0.0312364	Nampt	59027	1.50534
ENSMUSG00000028015	702.248	0.22255	0.0313686	Ctso	229445	1.5035
ENSMUSG00000025980	2504.04	0.151893	0.0314699	Hspd1	15510	1.5021
ENSMUSG00000031365	1243.72	0.178739	0.0315878	Zfp275	27081	1.50048
ENSMUSG00000020949	1881.52	0.178867	0.0316847	Fkbp3	30795	1.49915
ENSMUSG00000020386	1723.78	0.182028	0.0317039	Sar1b	66397	1.49889
ENSMUSG00000041238	223.641	0.354714	0.0318532	Rbbp8	225182	1.49685
ENSMUSG00000059708	780.89	0.215301	0.0319605	Akap17b	338351	1.49539
[truncated: 1,521 more rows]
